# Supplementary material for: Associations between body circumference and testosterone levels and risk of metabolic dysfunction-associated fatty liver disease: a mendelian randomization study
Source: Springer Nature journal article supplement (doi:10.1186/s12889-023-15467-4), 2023-03-30

# MR results visualization chart<sub>s</sub>

## Scatterplot of waist circumference and MAFLD risk

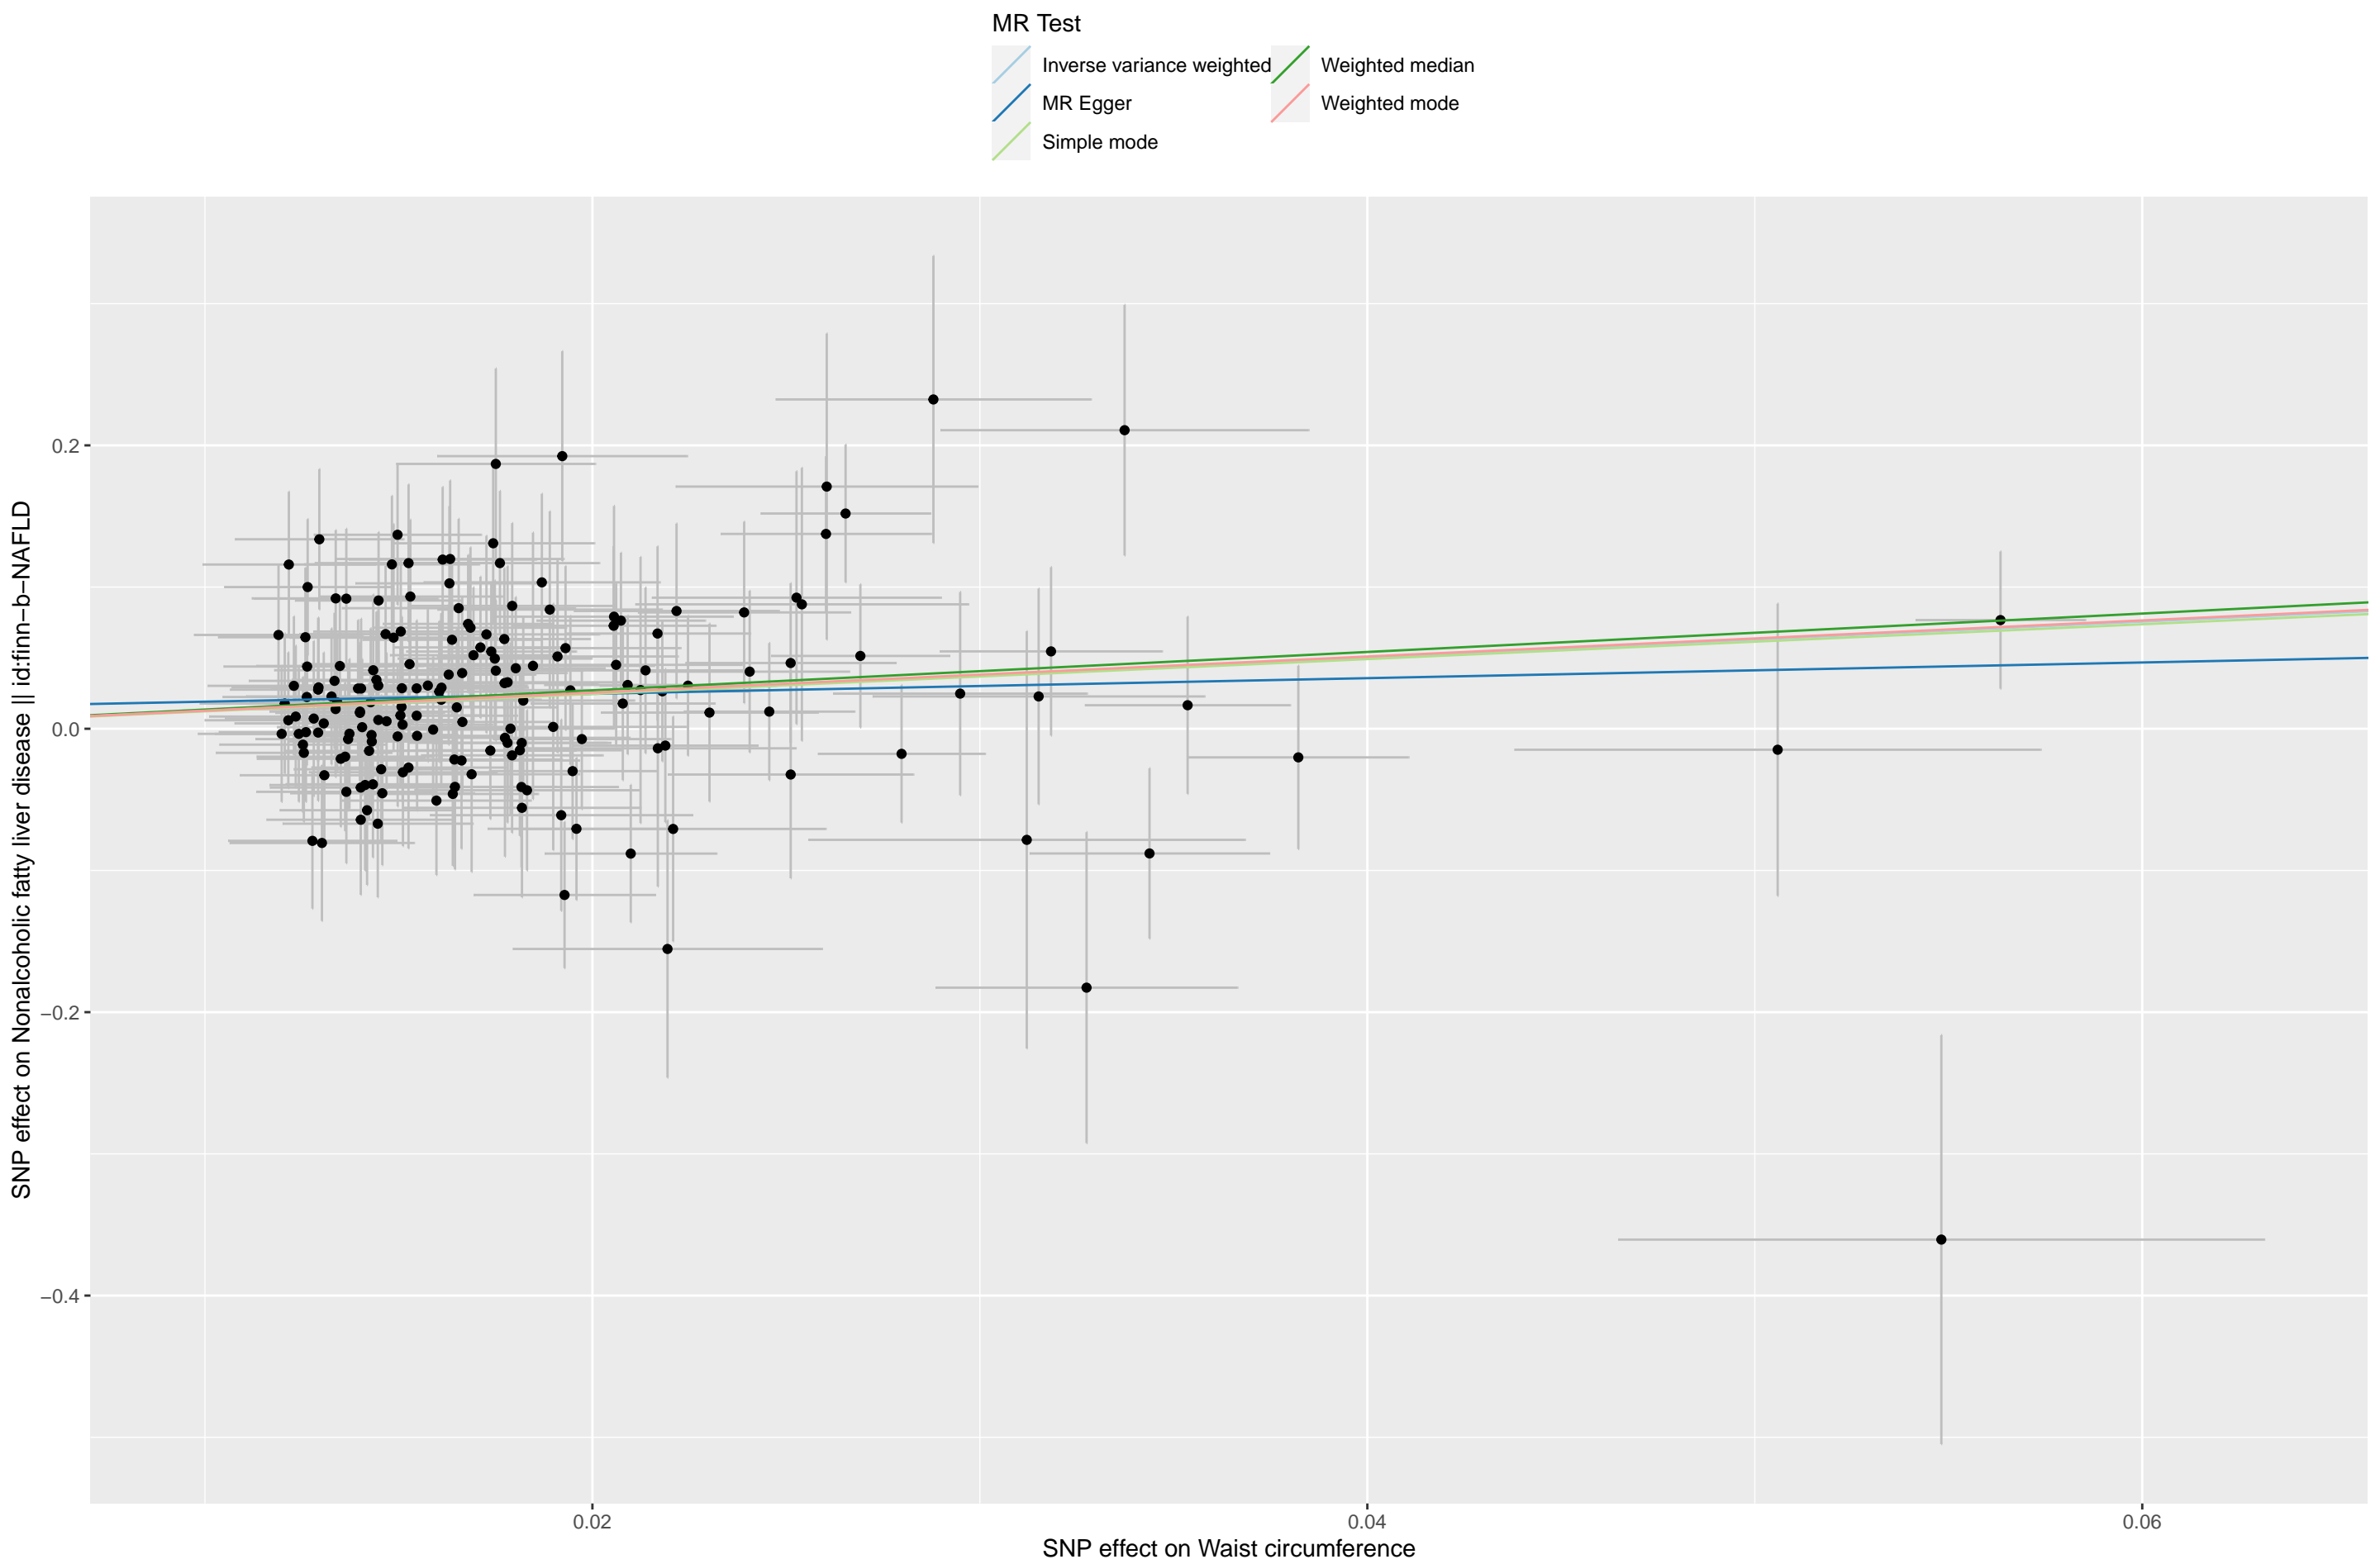

# Funnel plot of waist circumference and MAFLD risk

MR Method  
Inverse variance weighted  
MR Egger

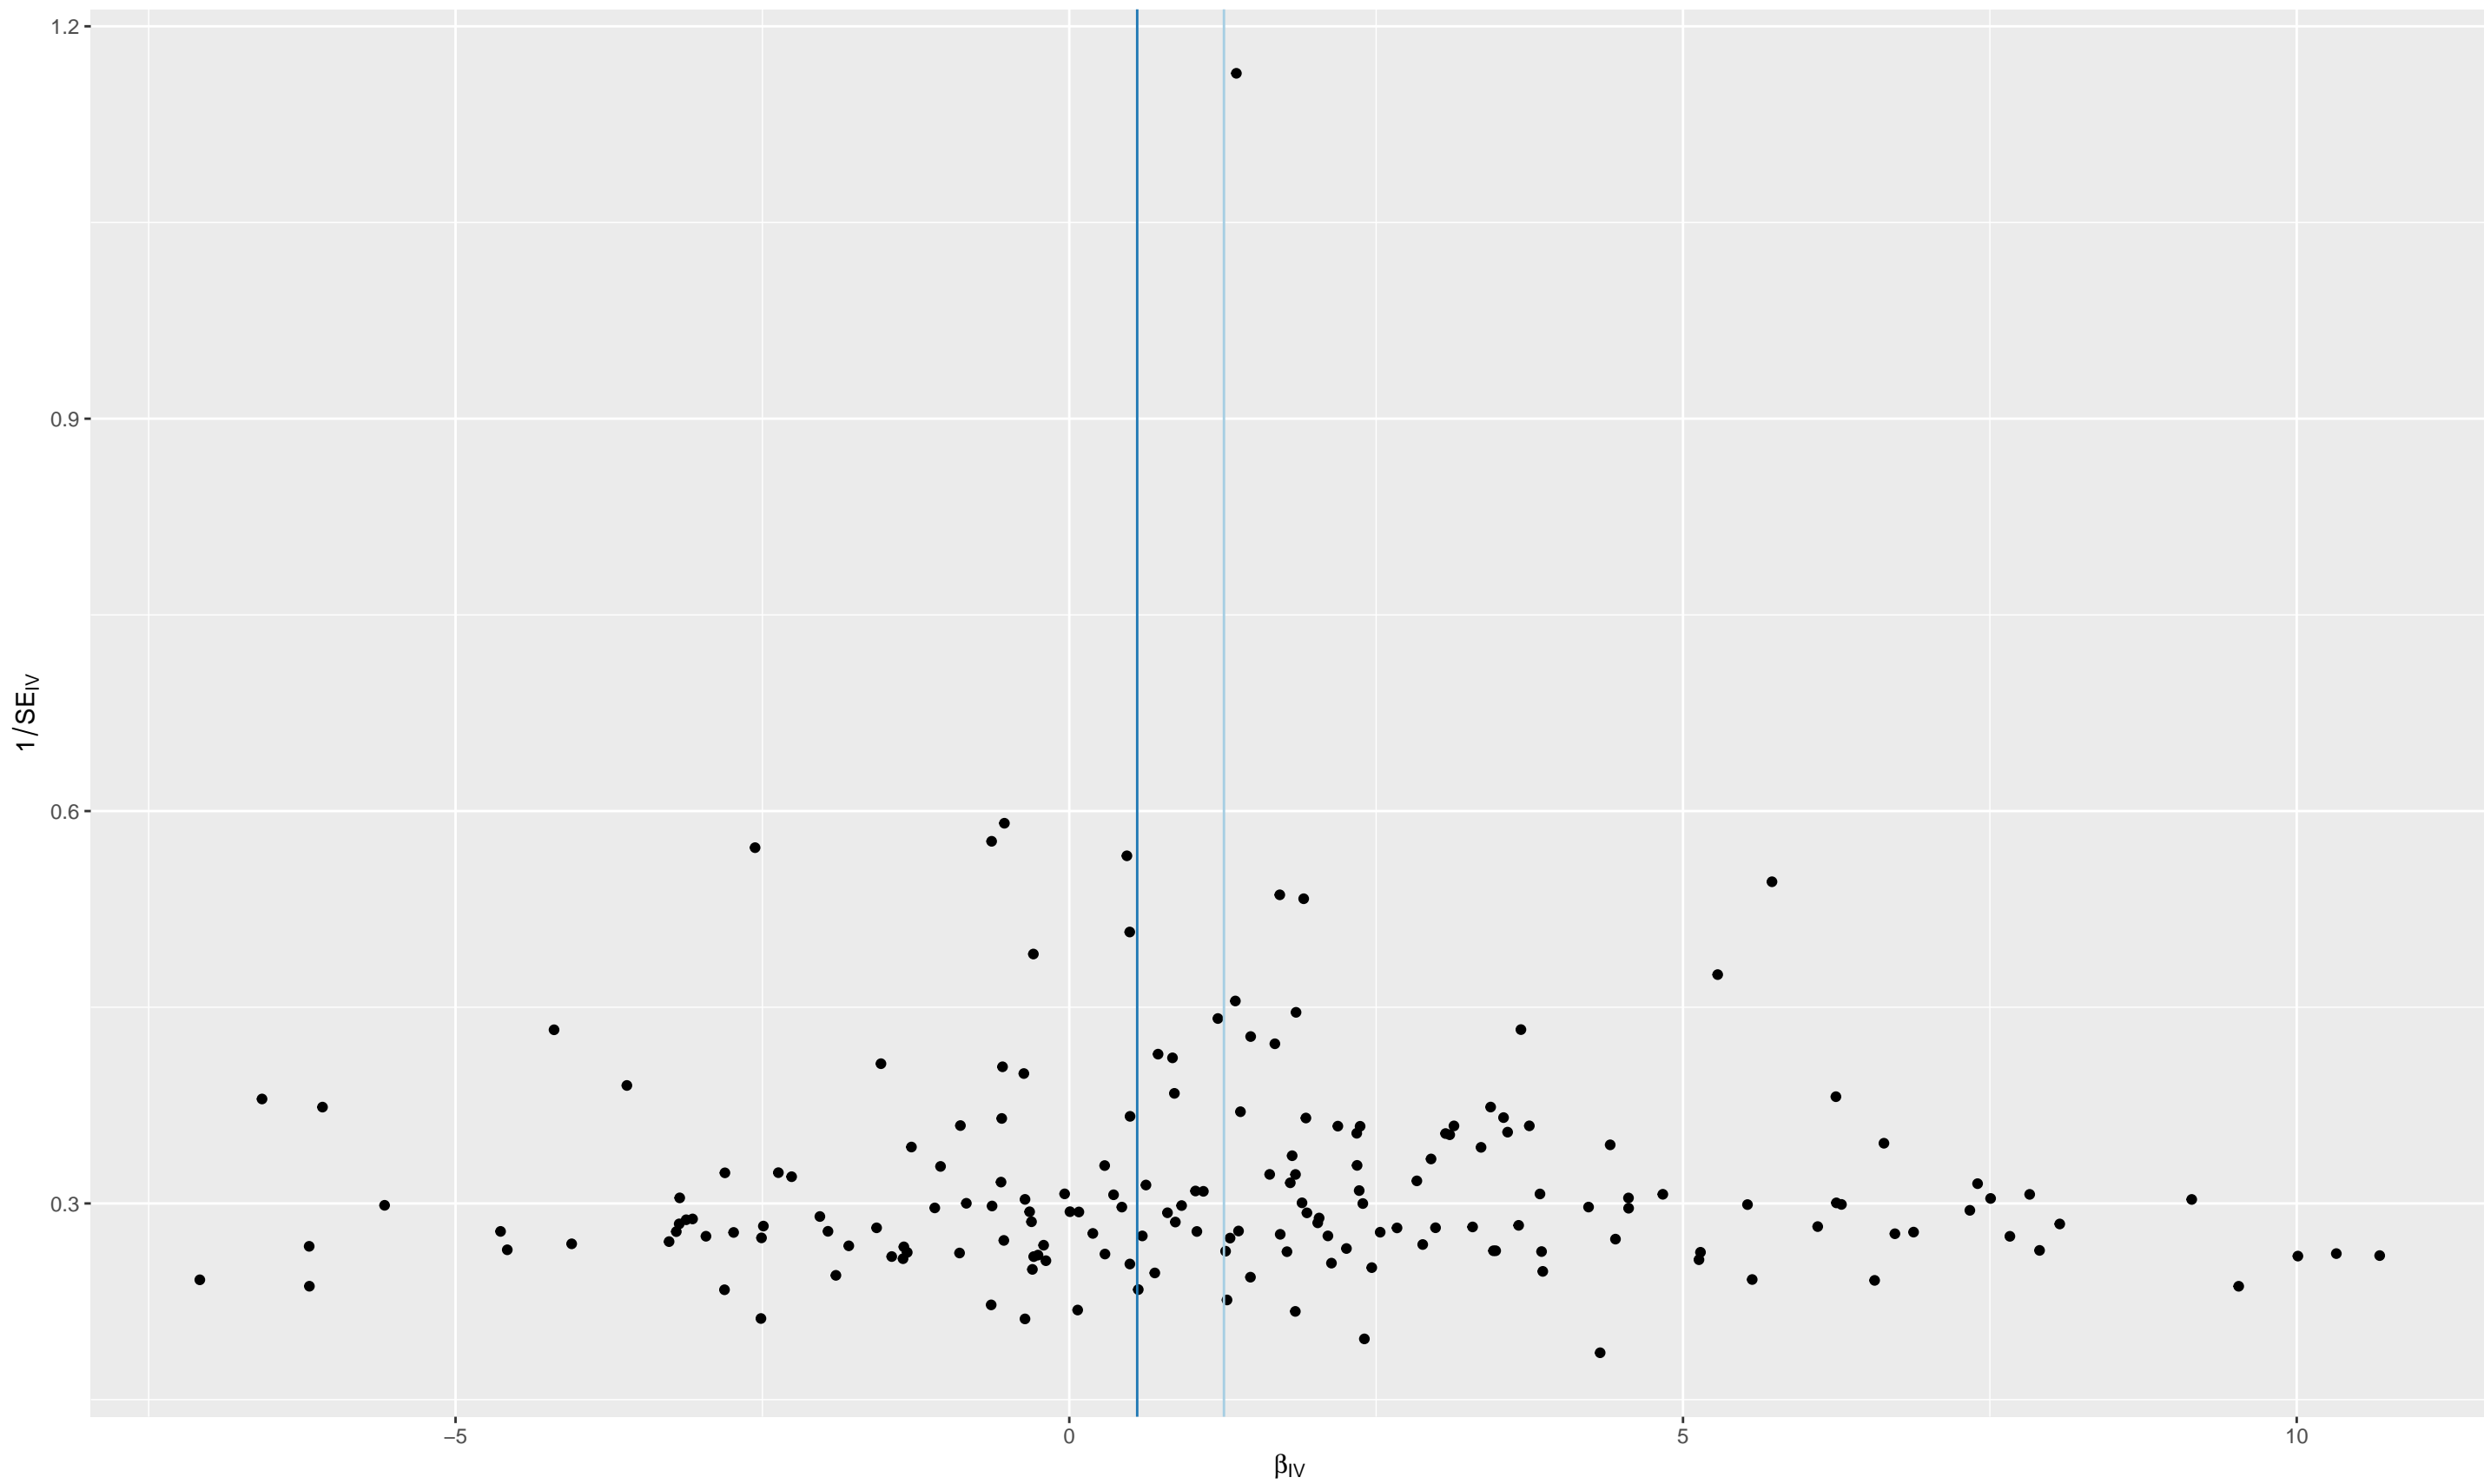

# Forest plot of waist circumference and MAFLD risk

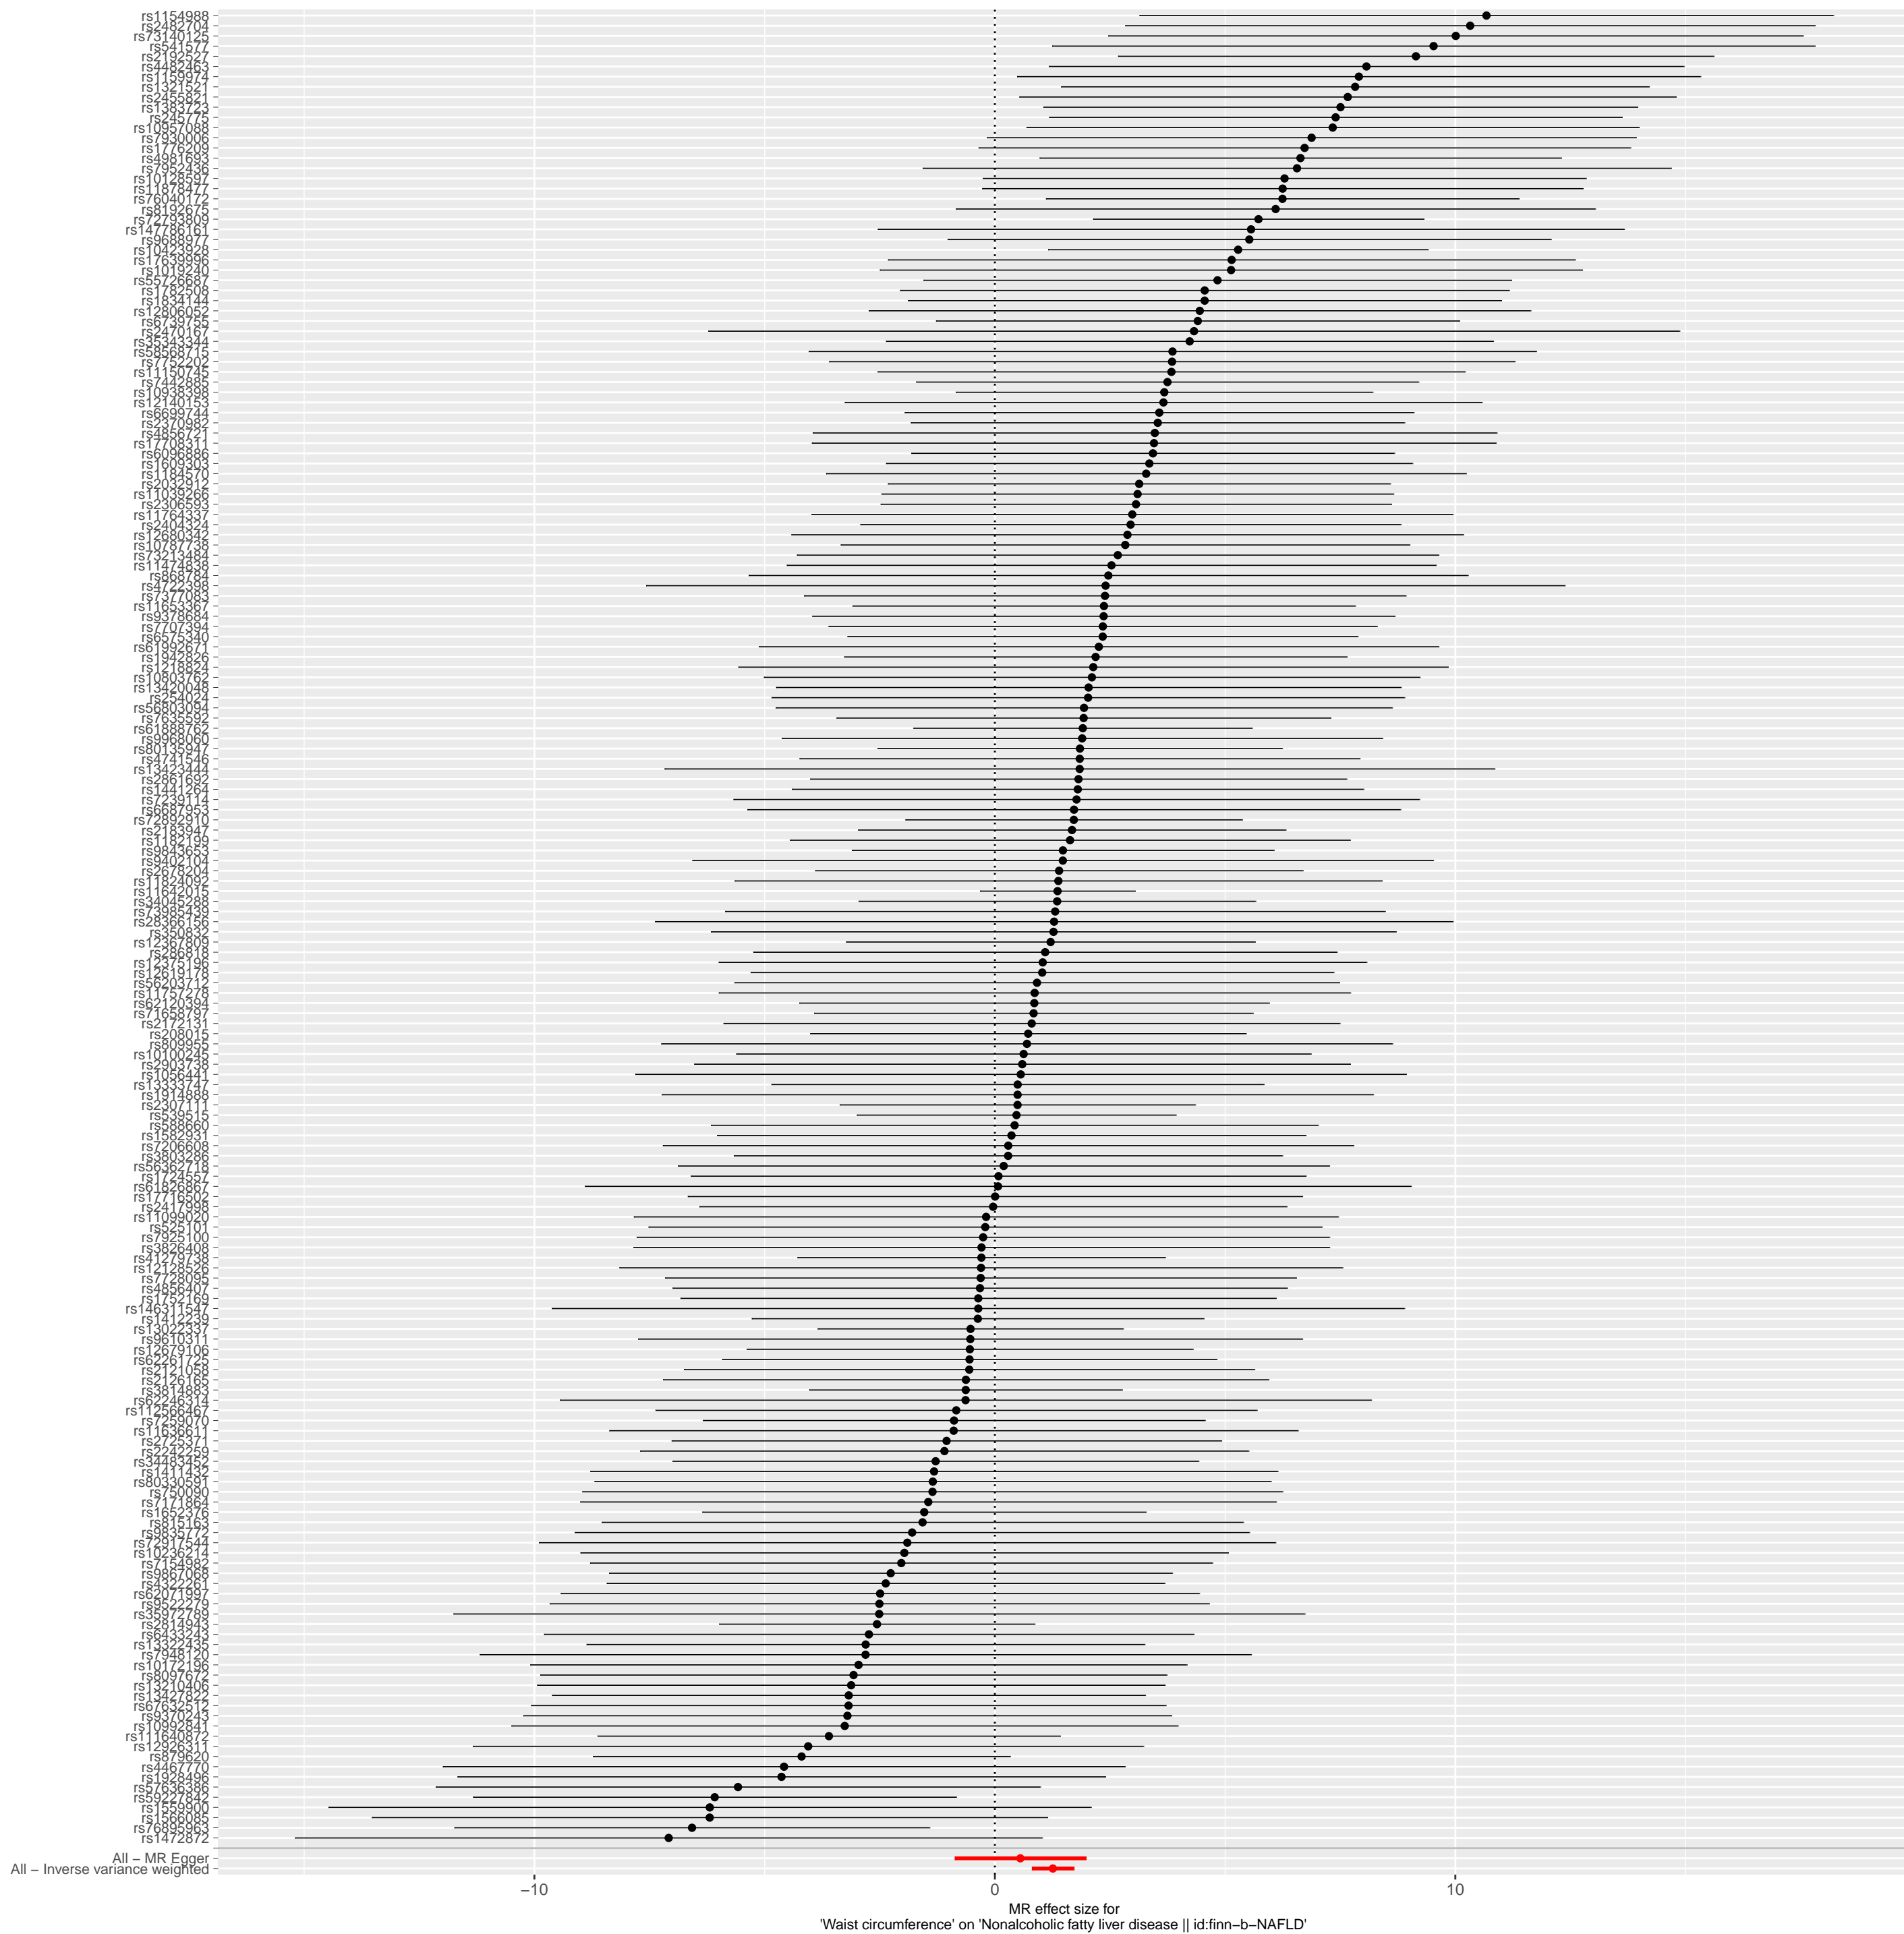



# Scatterplot of waist-to-hip ratio and MAFLD risk

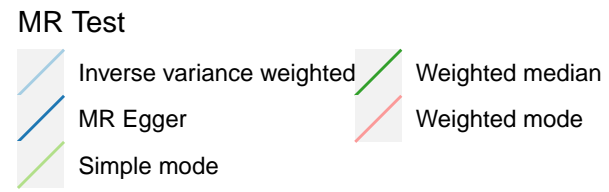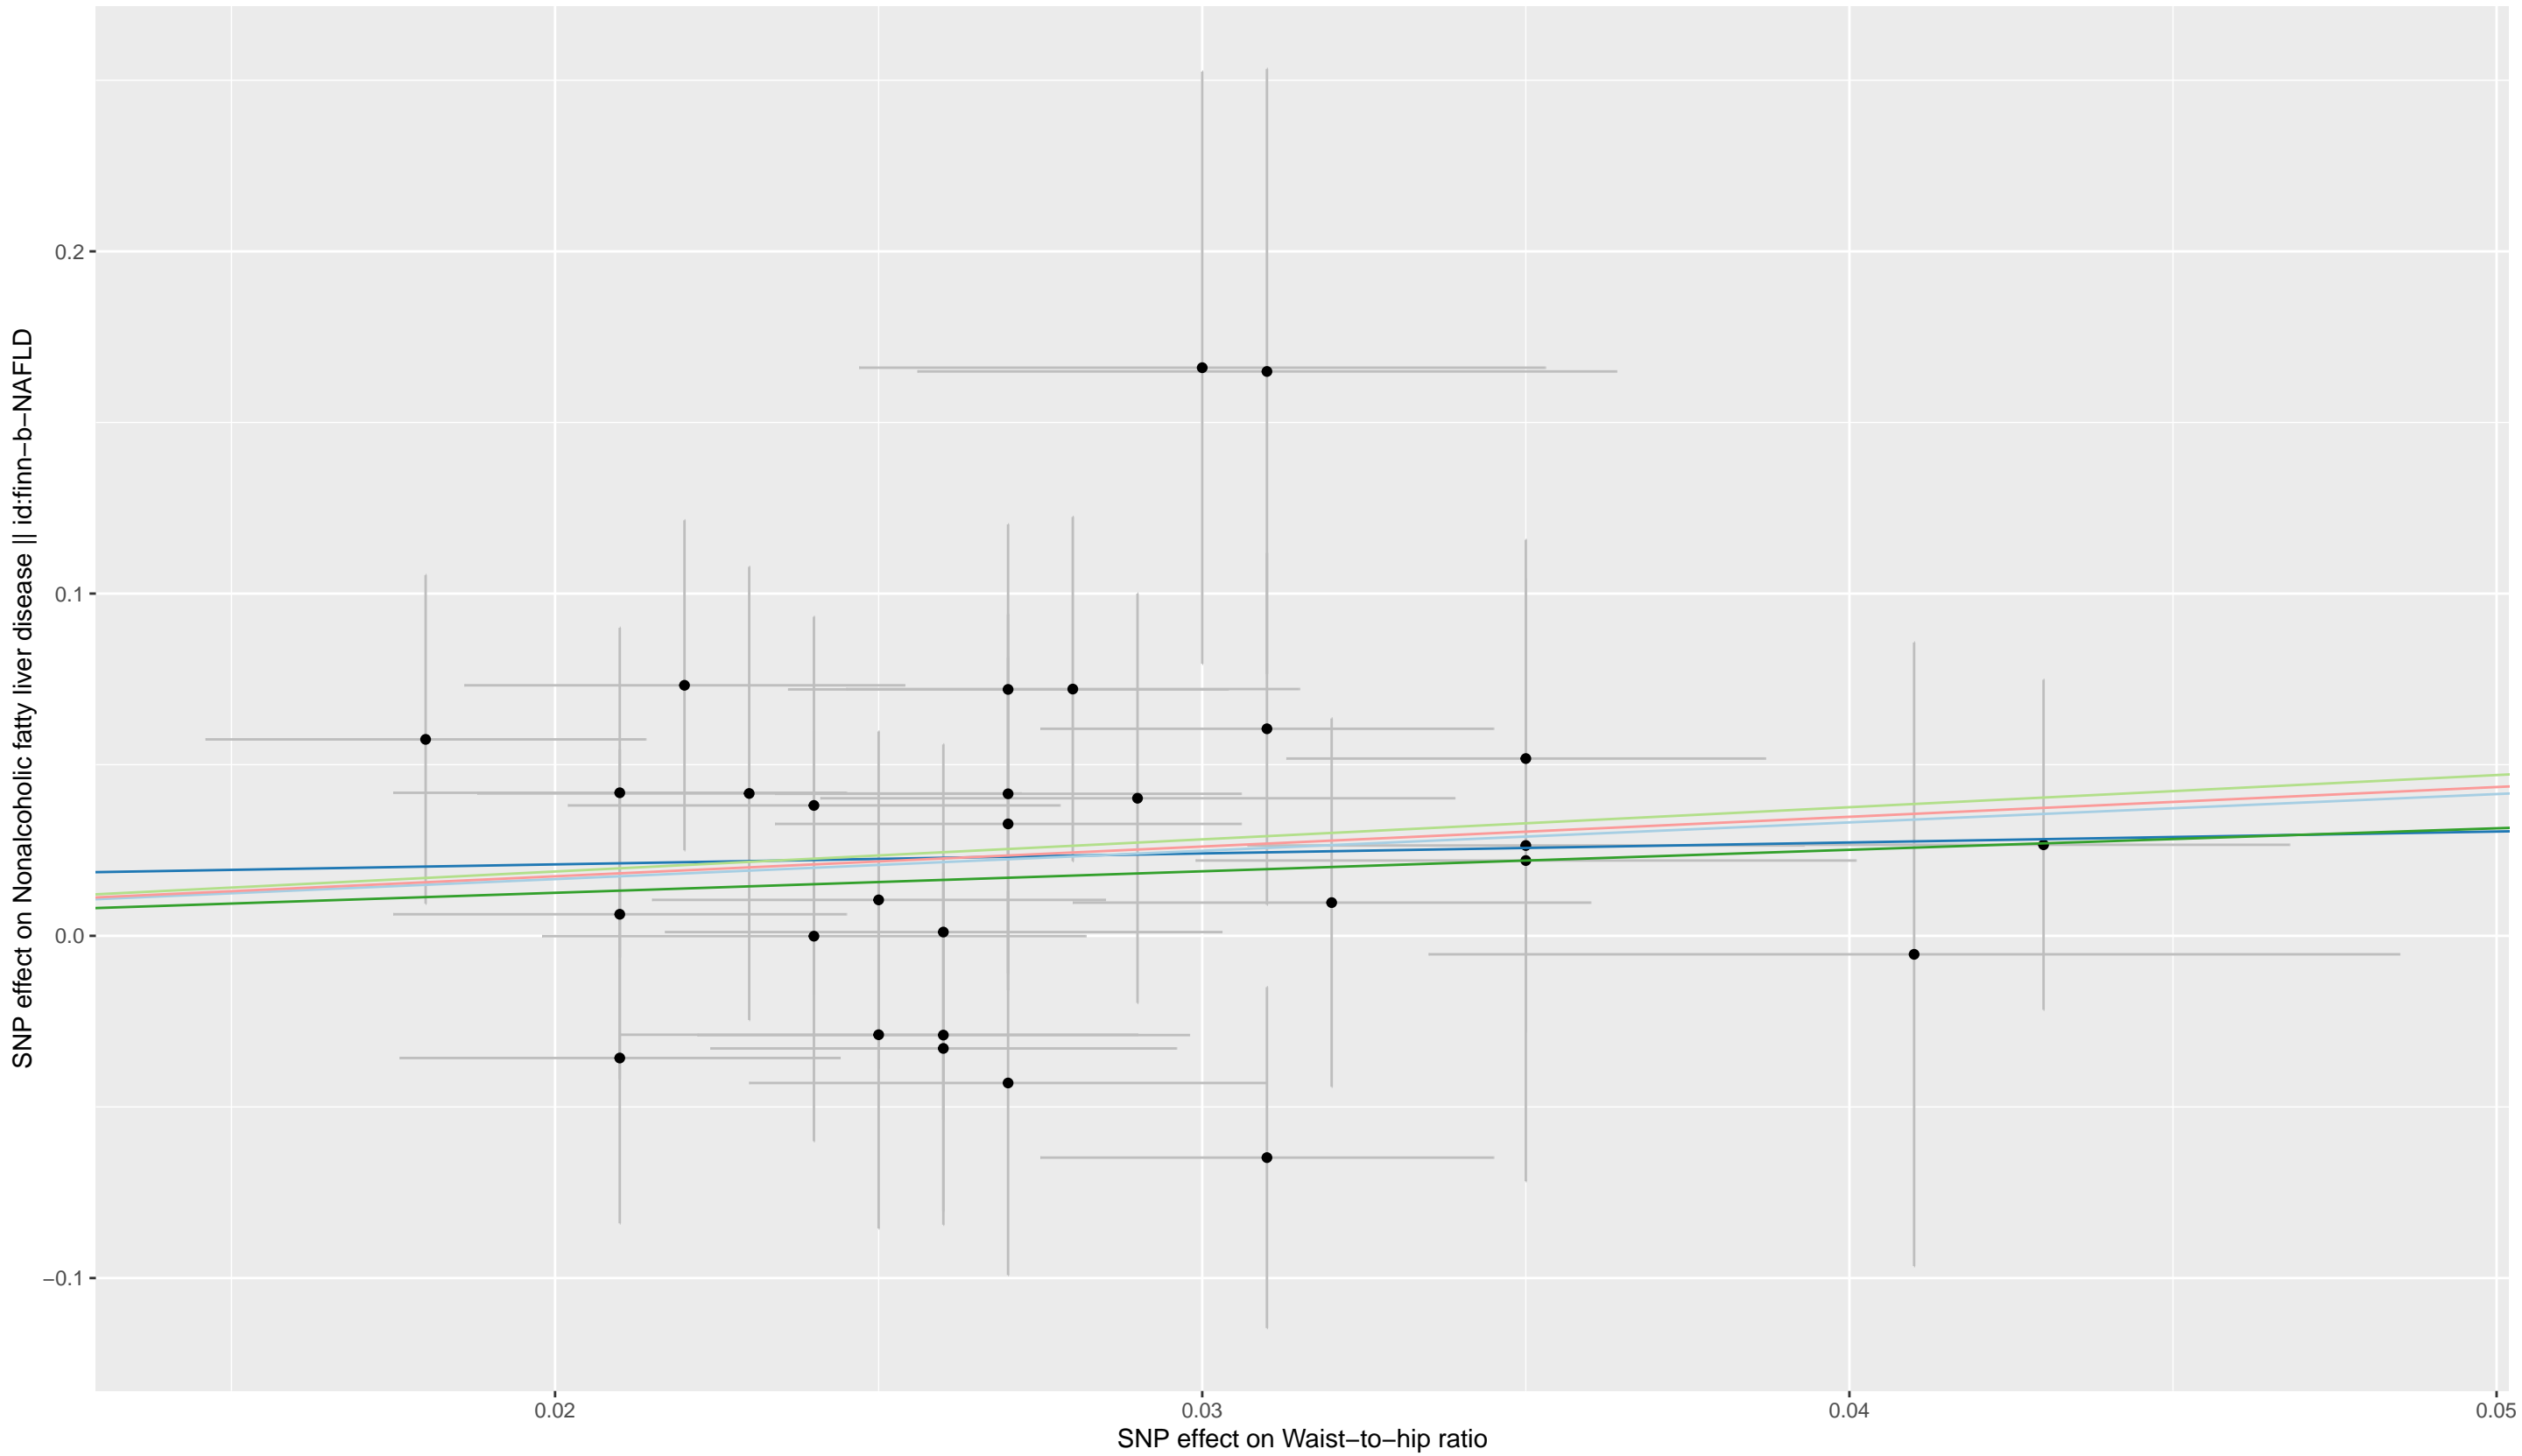

# Funnel plot of waist-to-hip ratio and MAFLD risk

MR Method  
Inverse variance weighted  
MR Egger

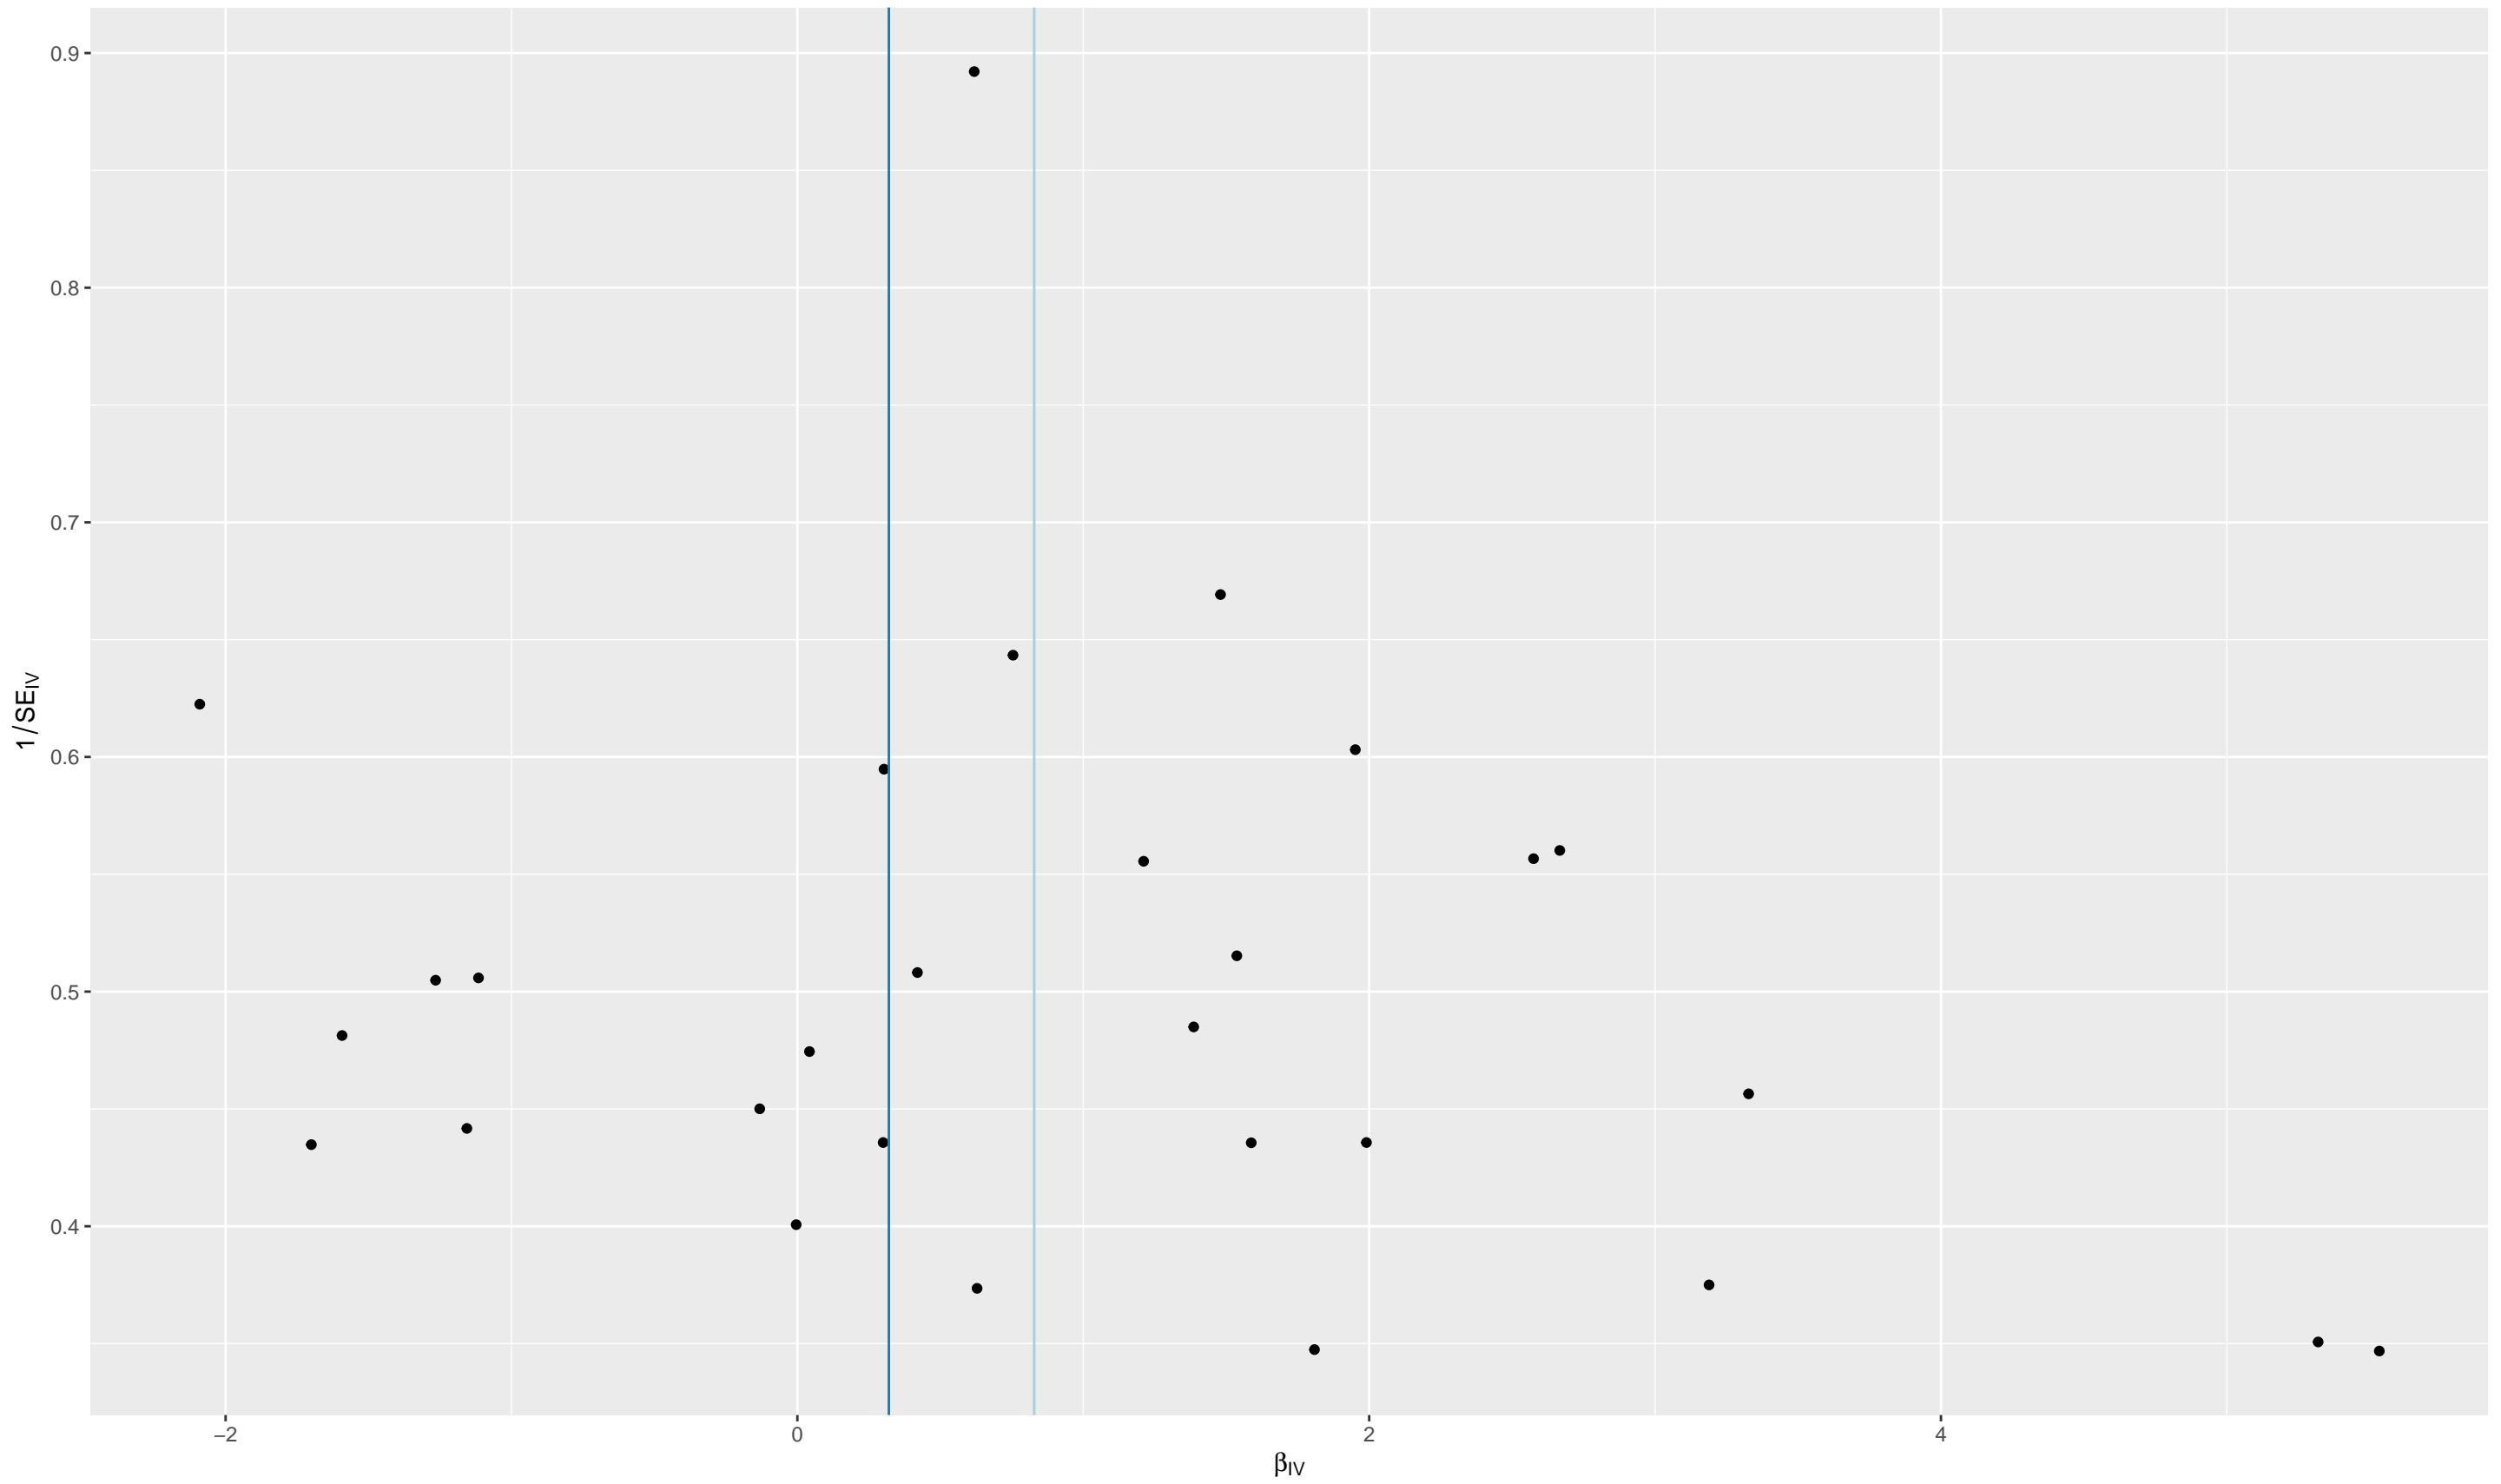

# Forest plot of waist-to-hip ratio and MAFLD risk

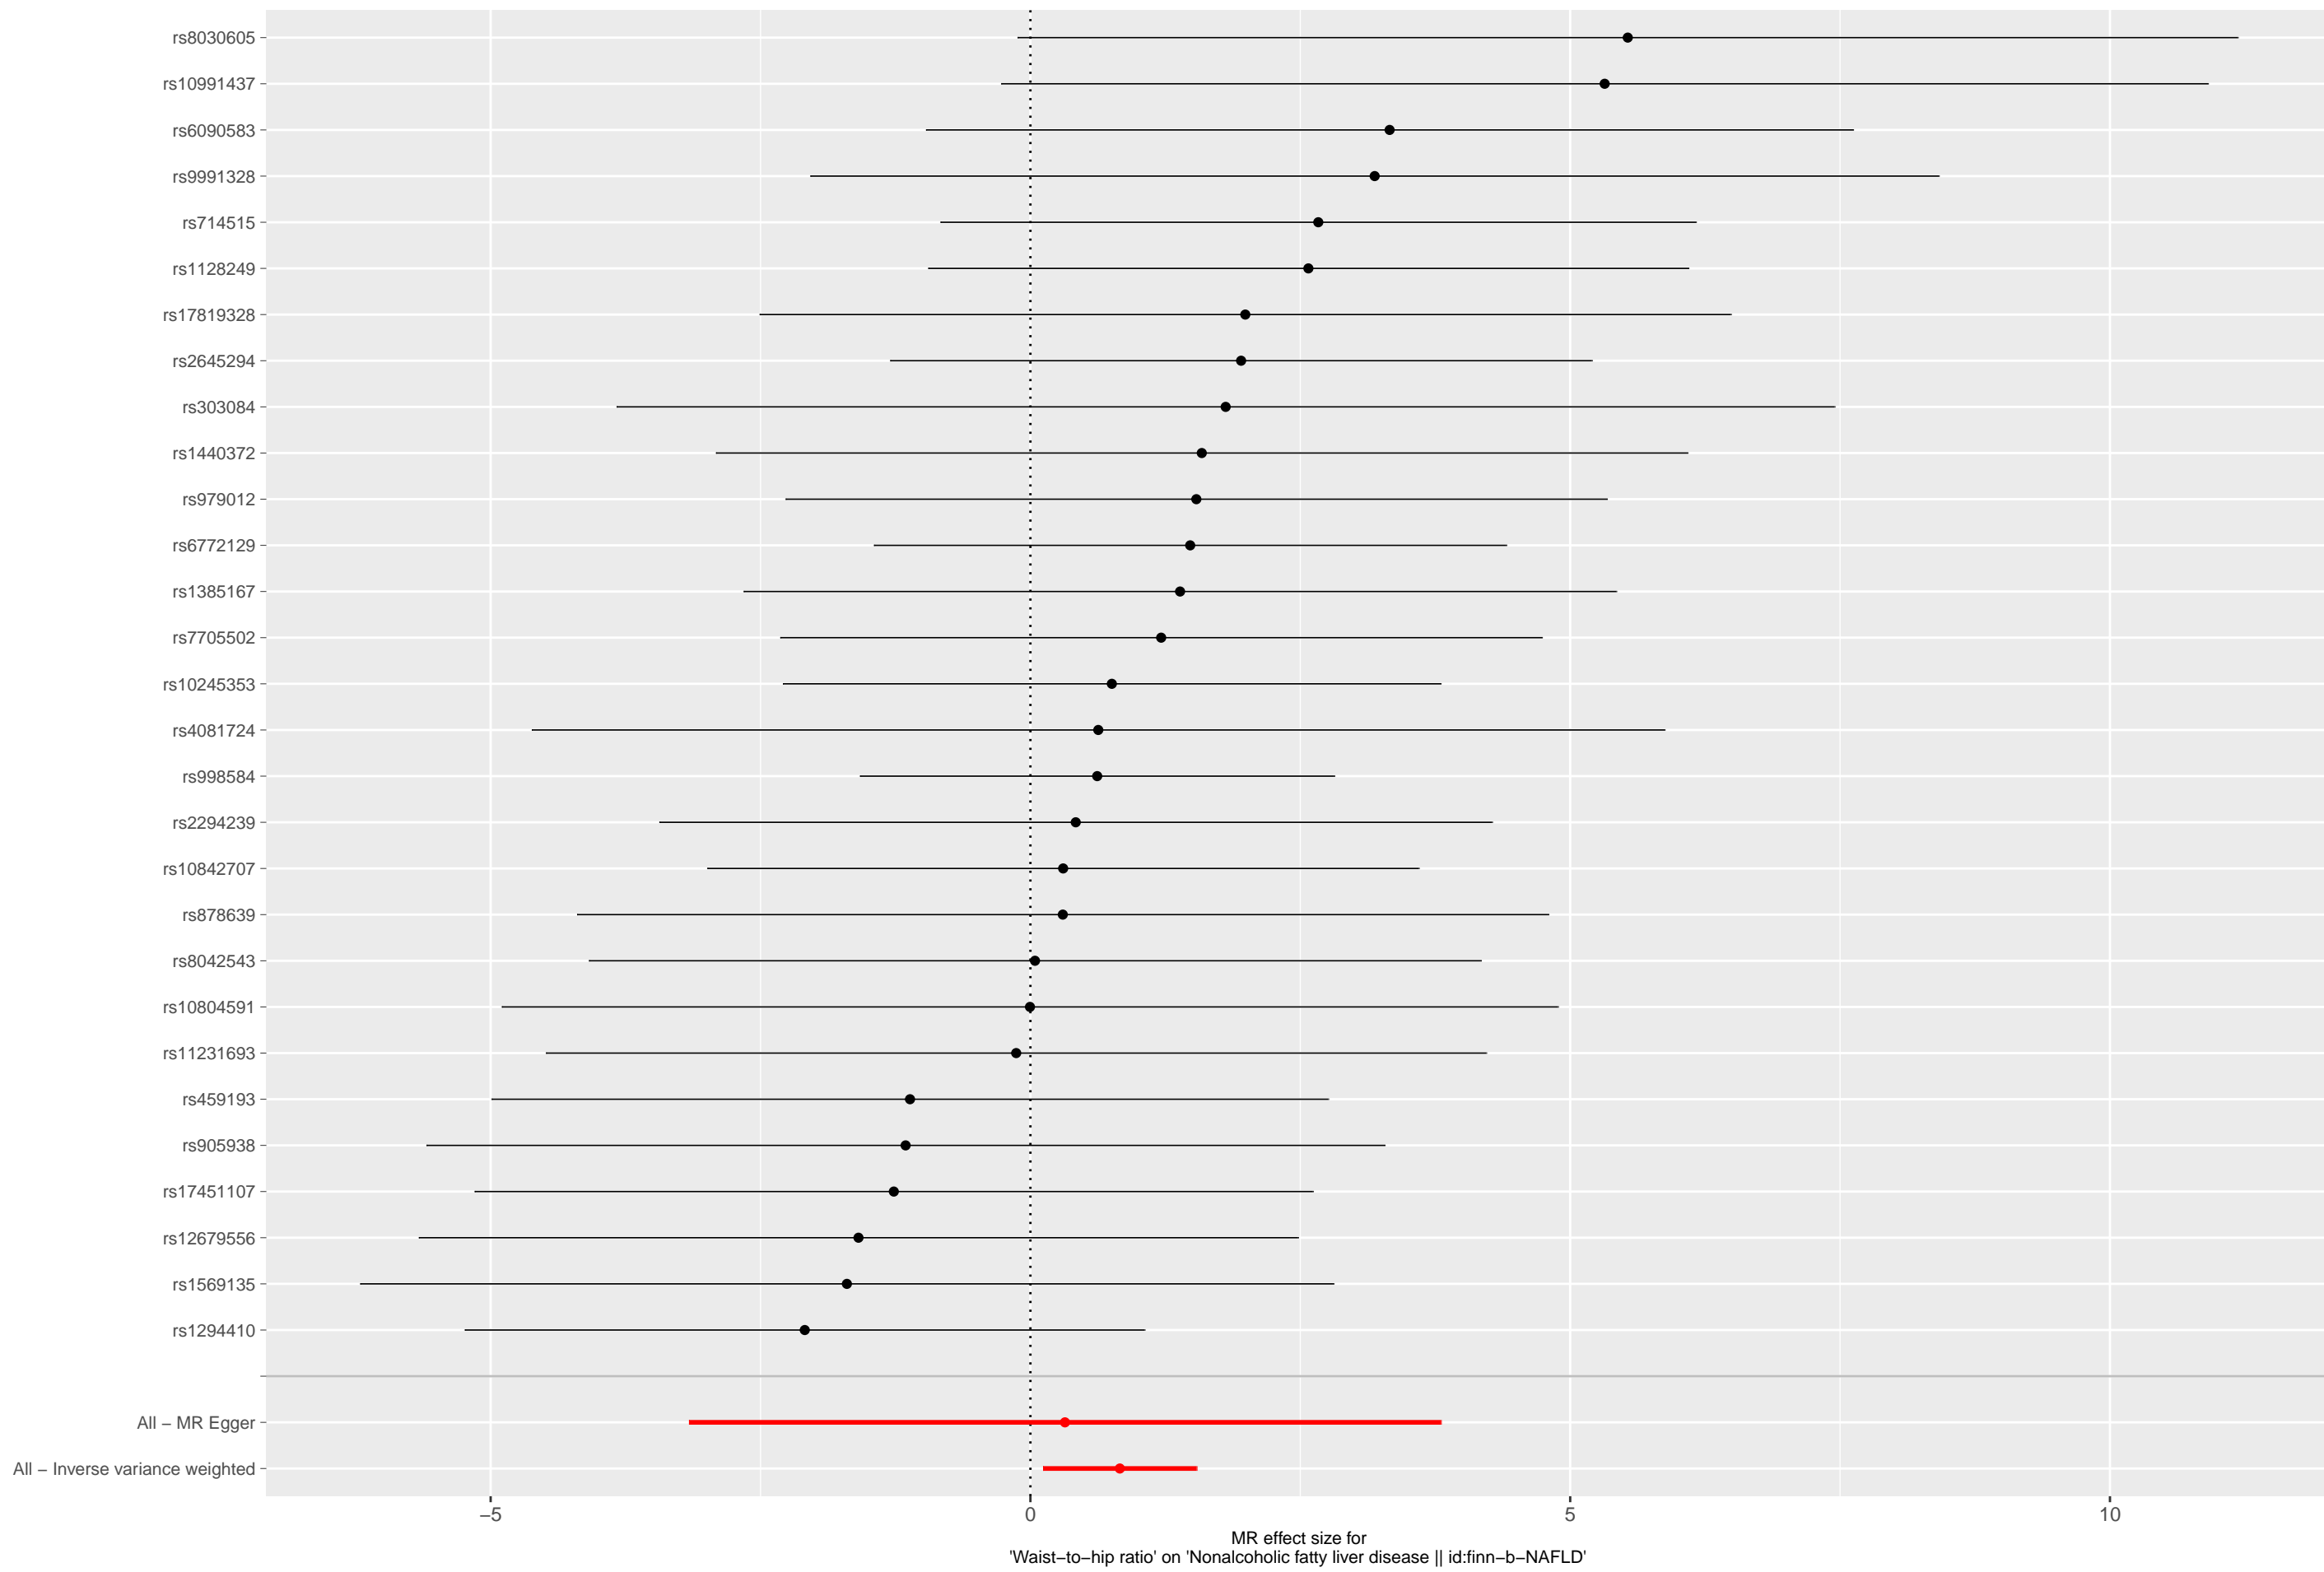

# Sensitivity analysis of the "leave-one-out" method for waist-to-hip ratio and MAFLD risk

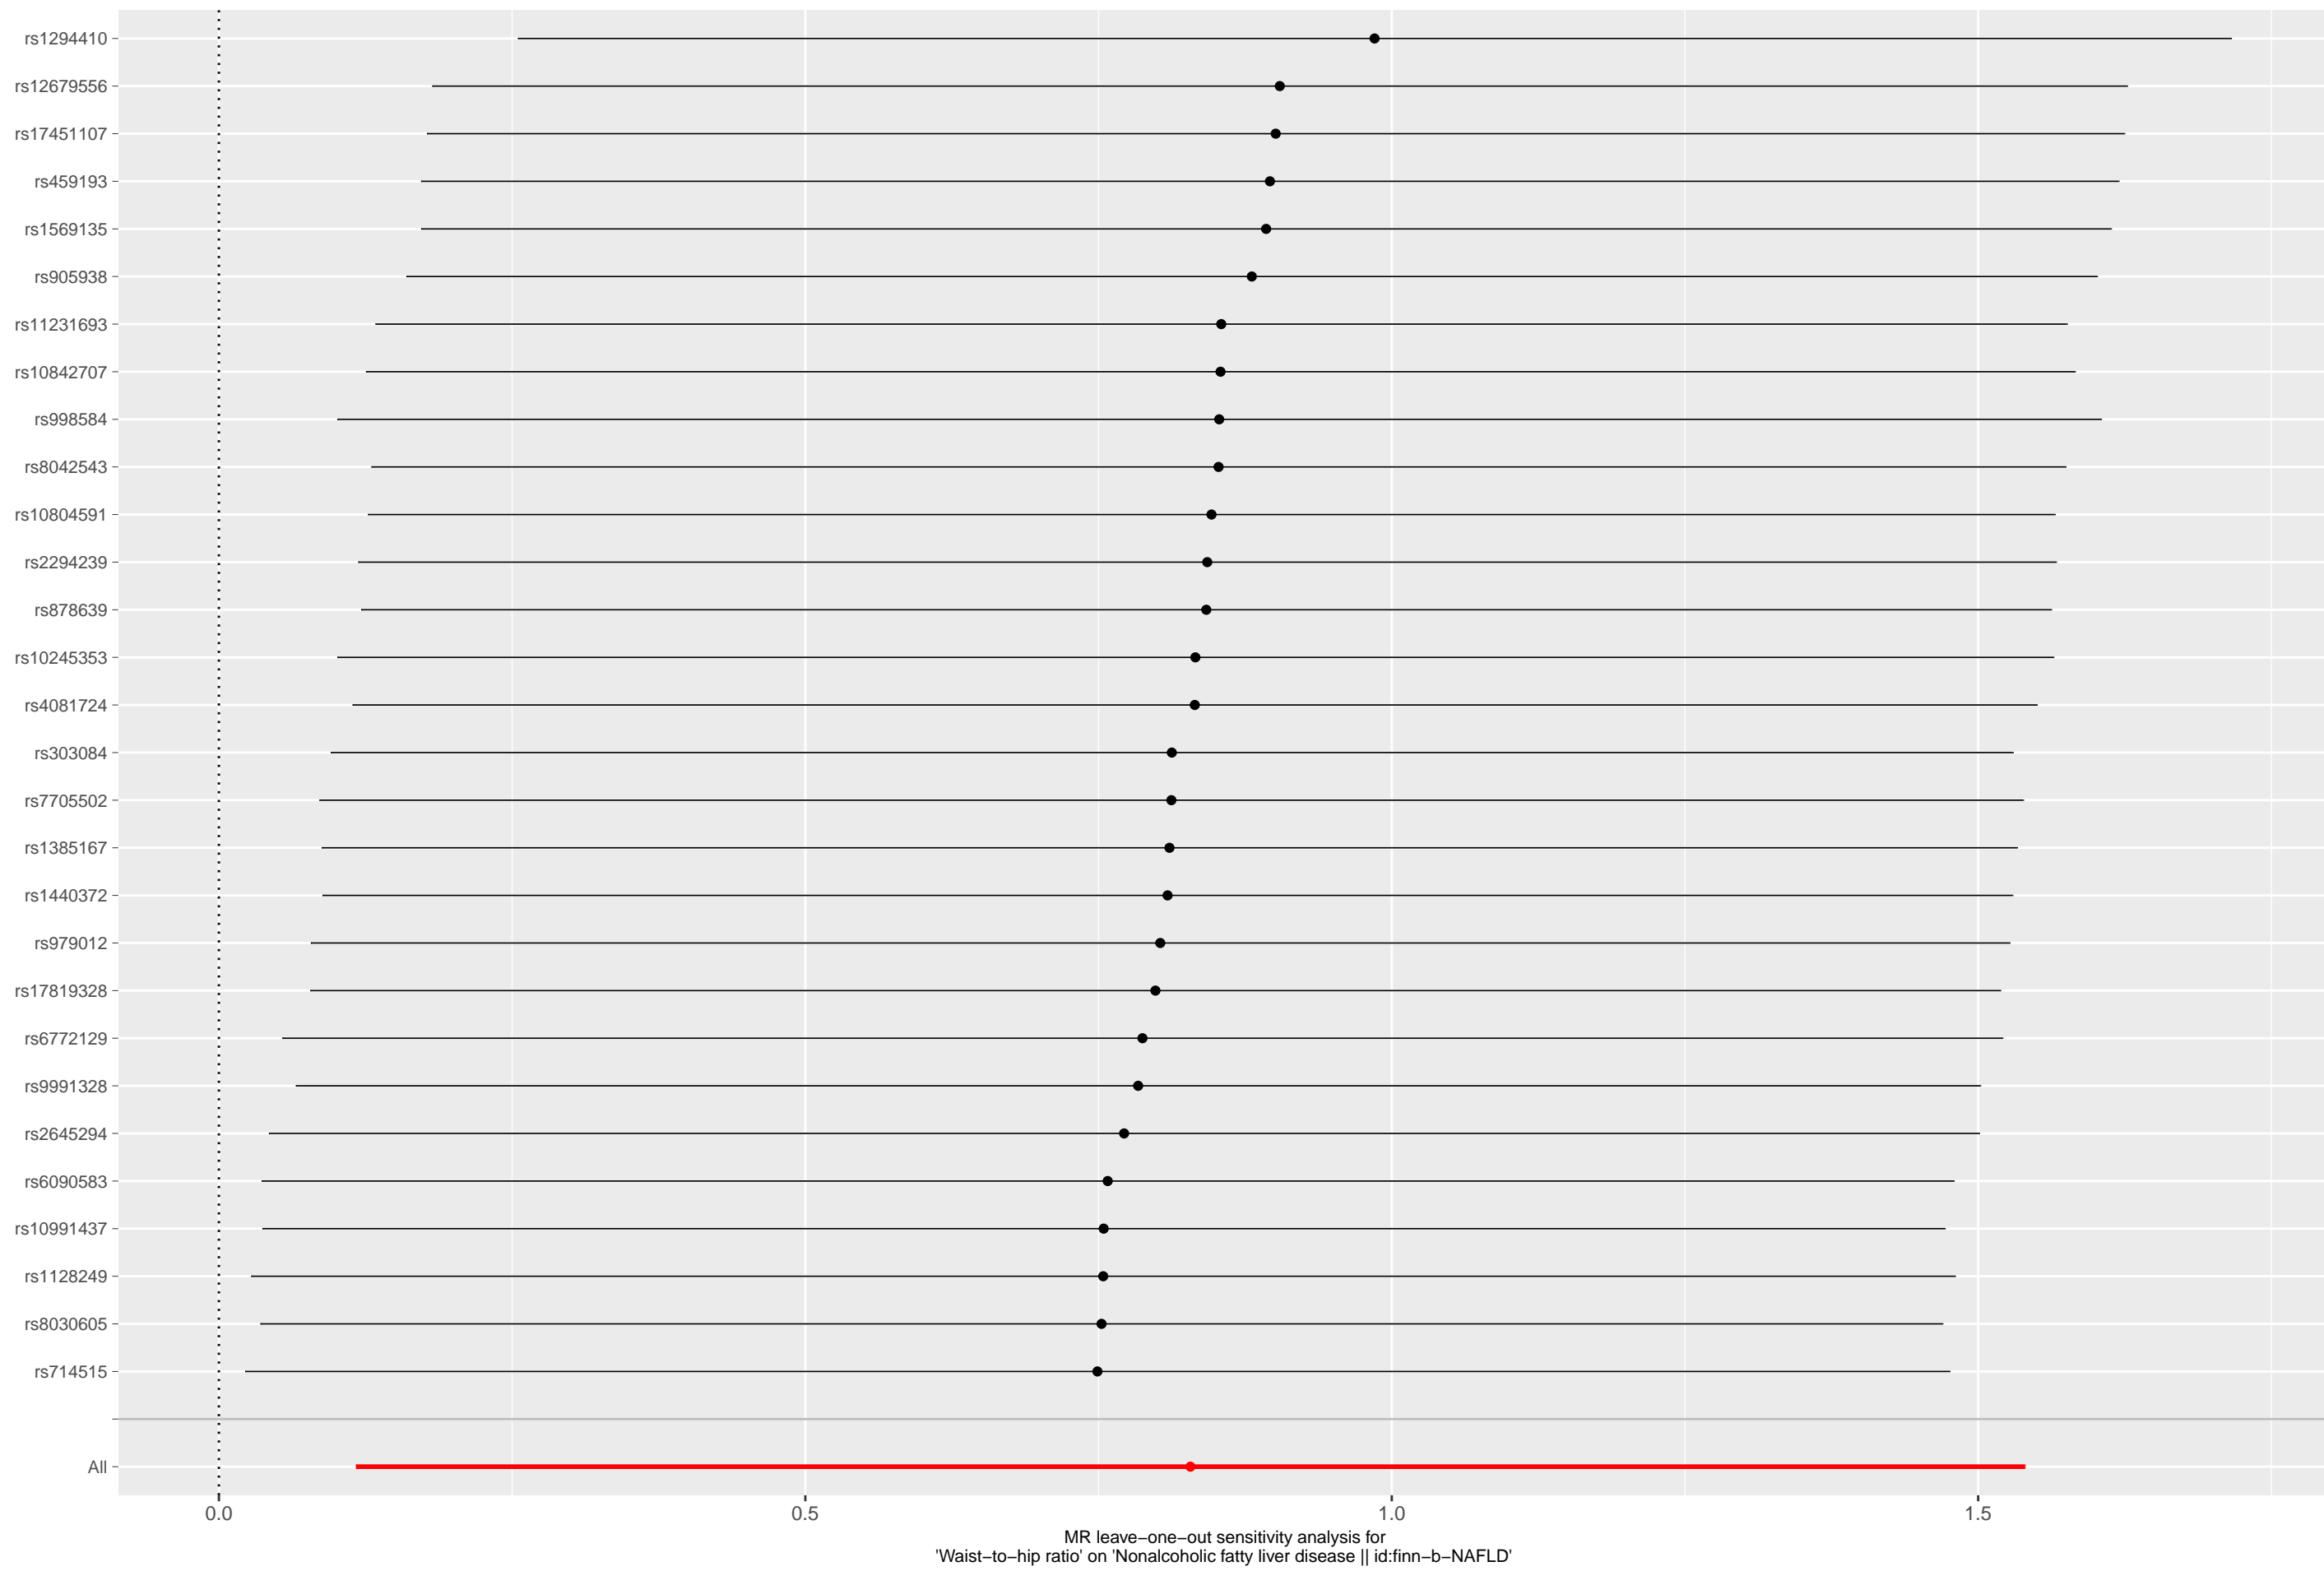



# Scatterplot of testosterone level and MAFLD risk

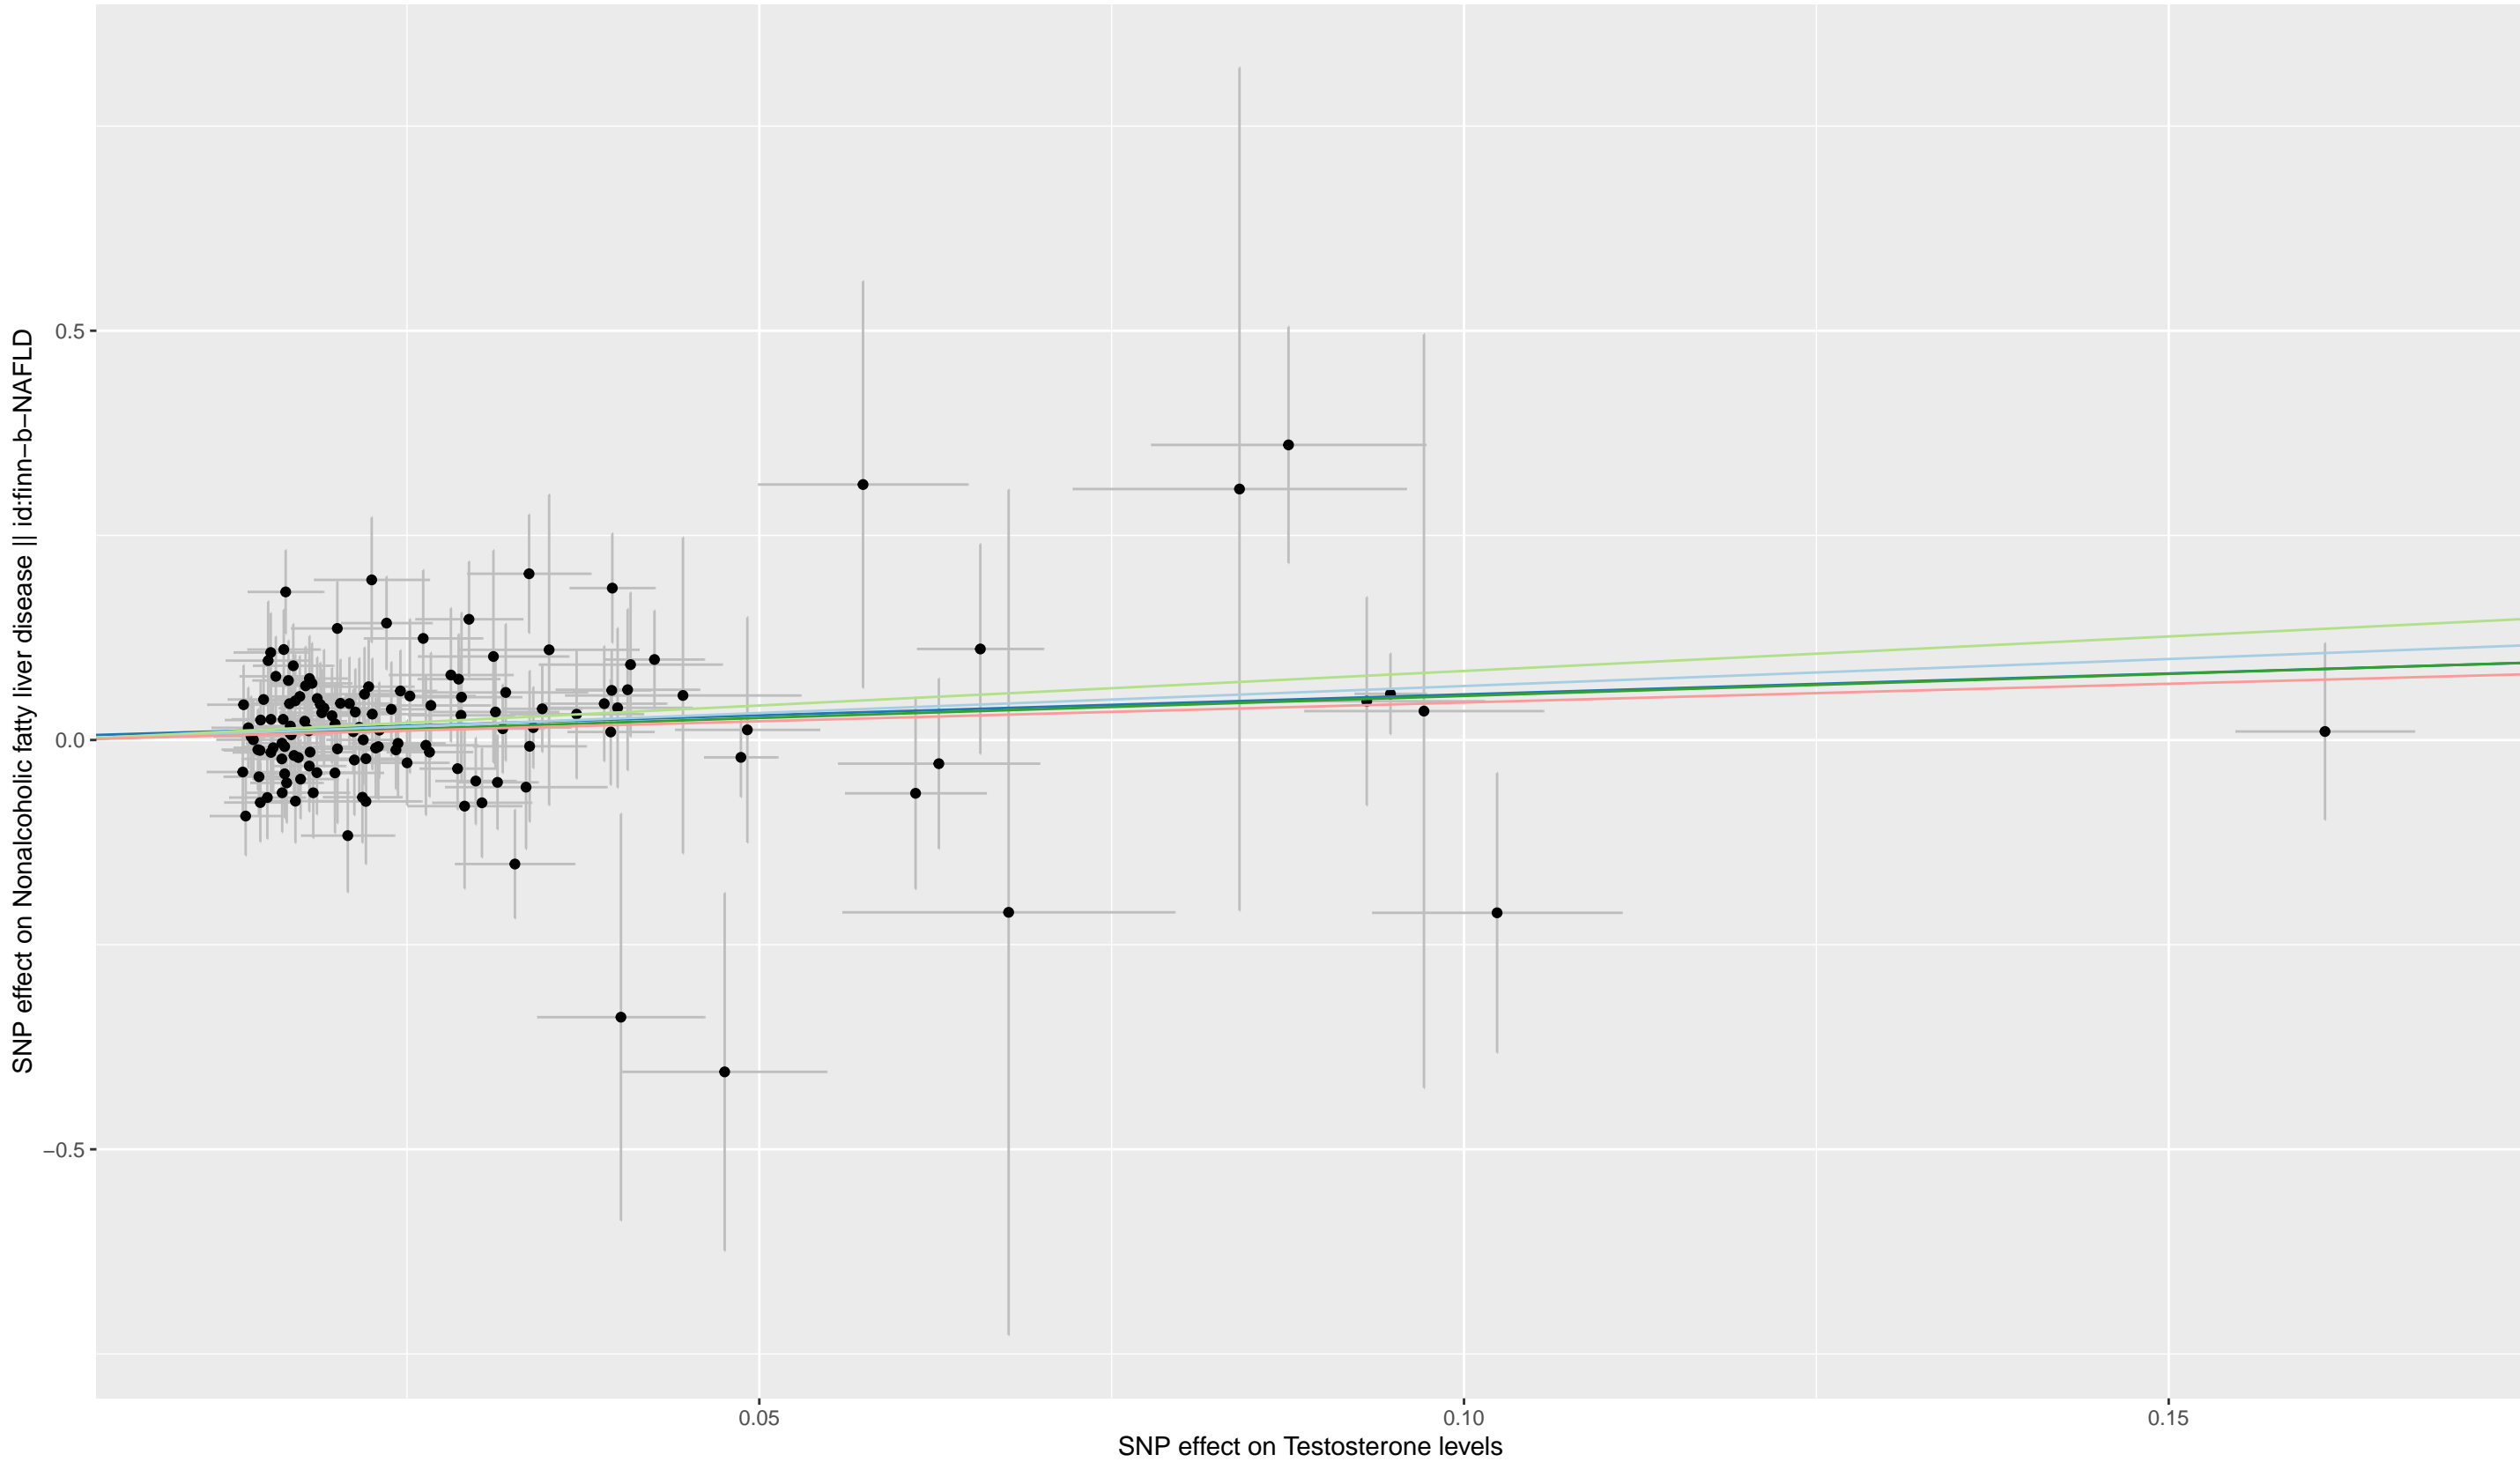

# Funnel plot of testosterone level and MAFLD risk

MR Method  
Inverse variance weighted  
MR Egger

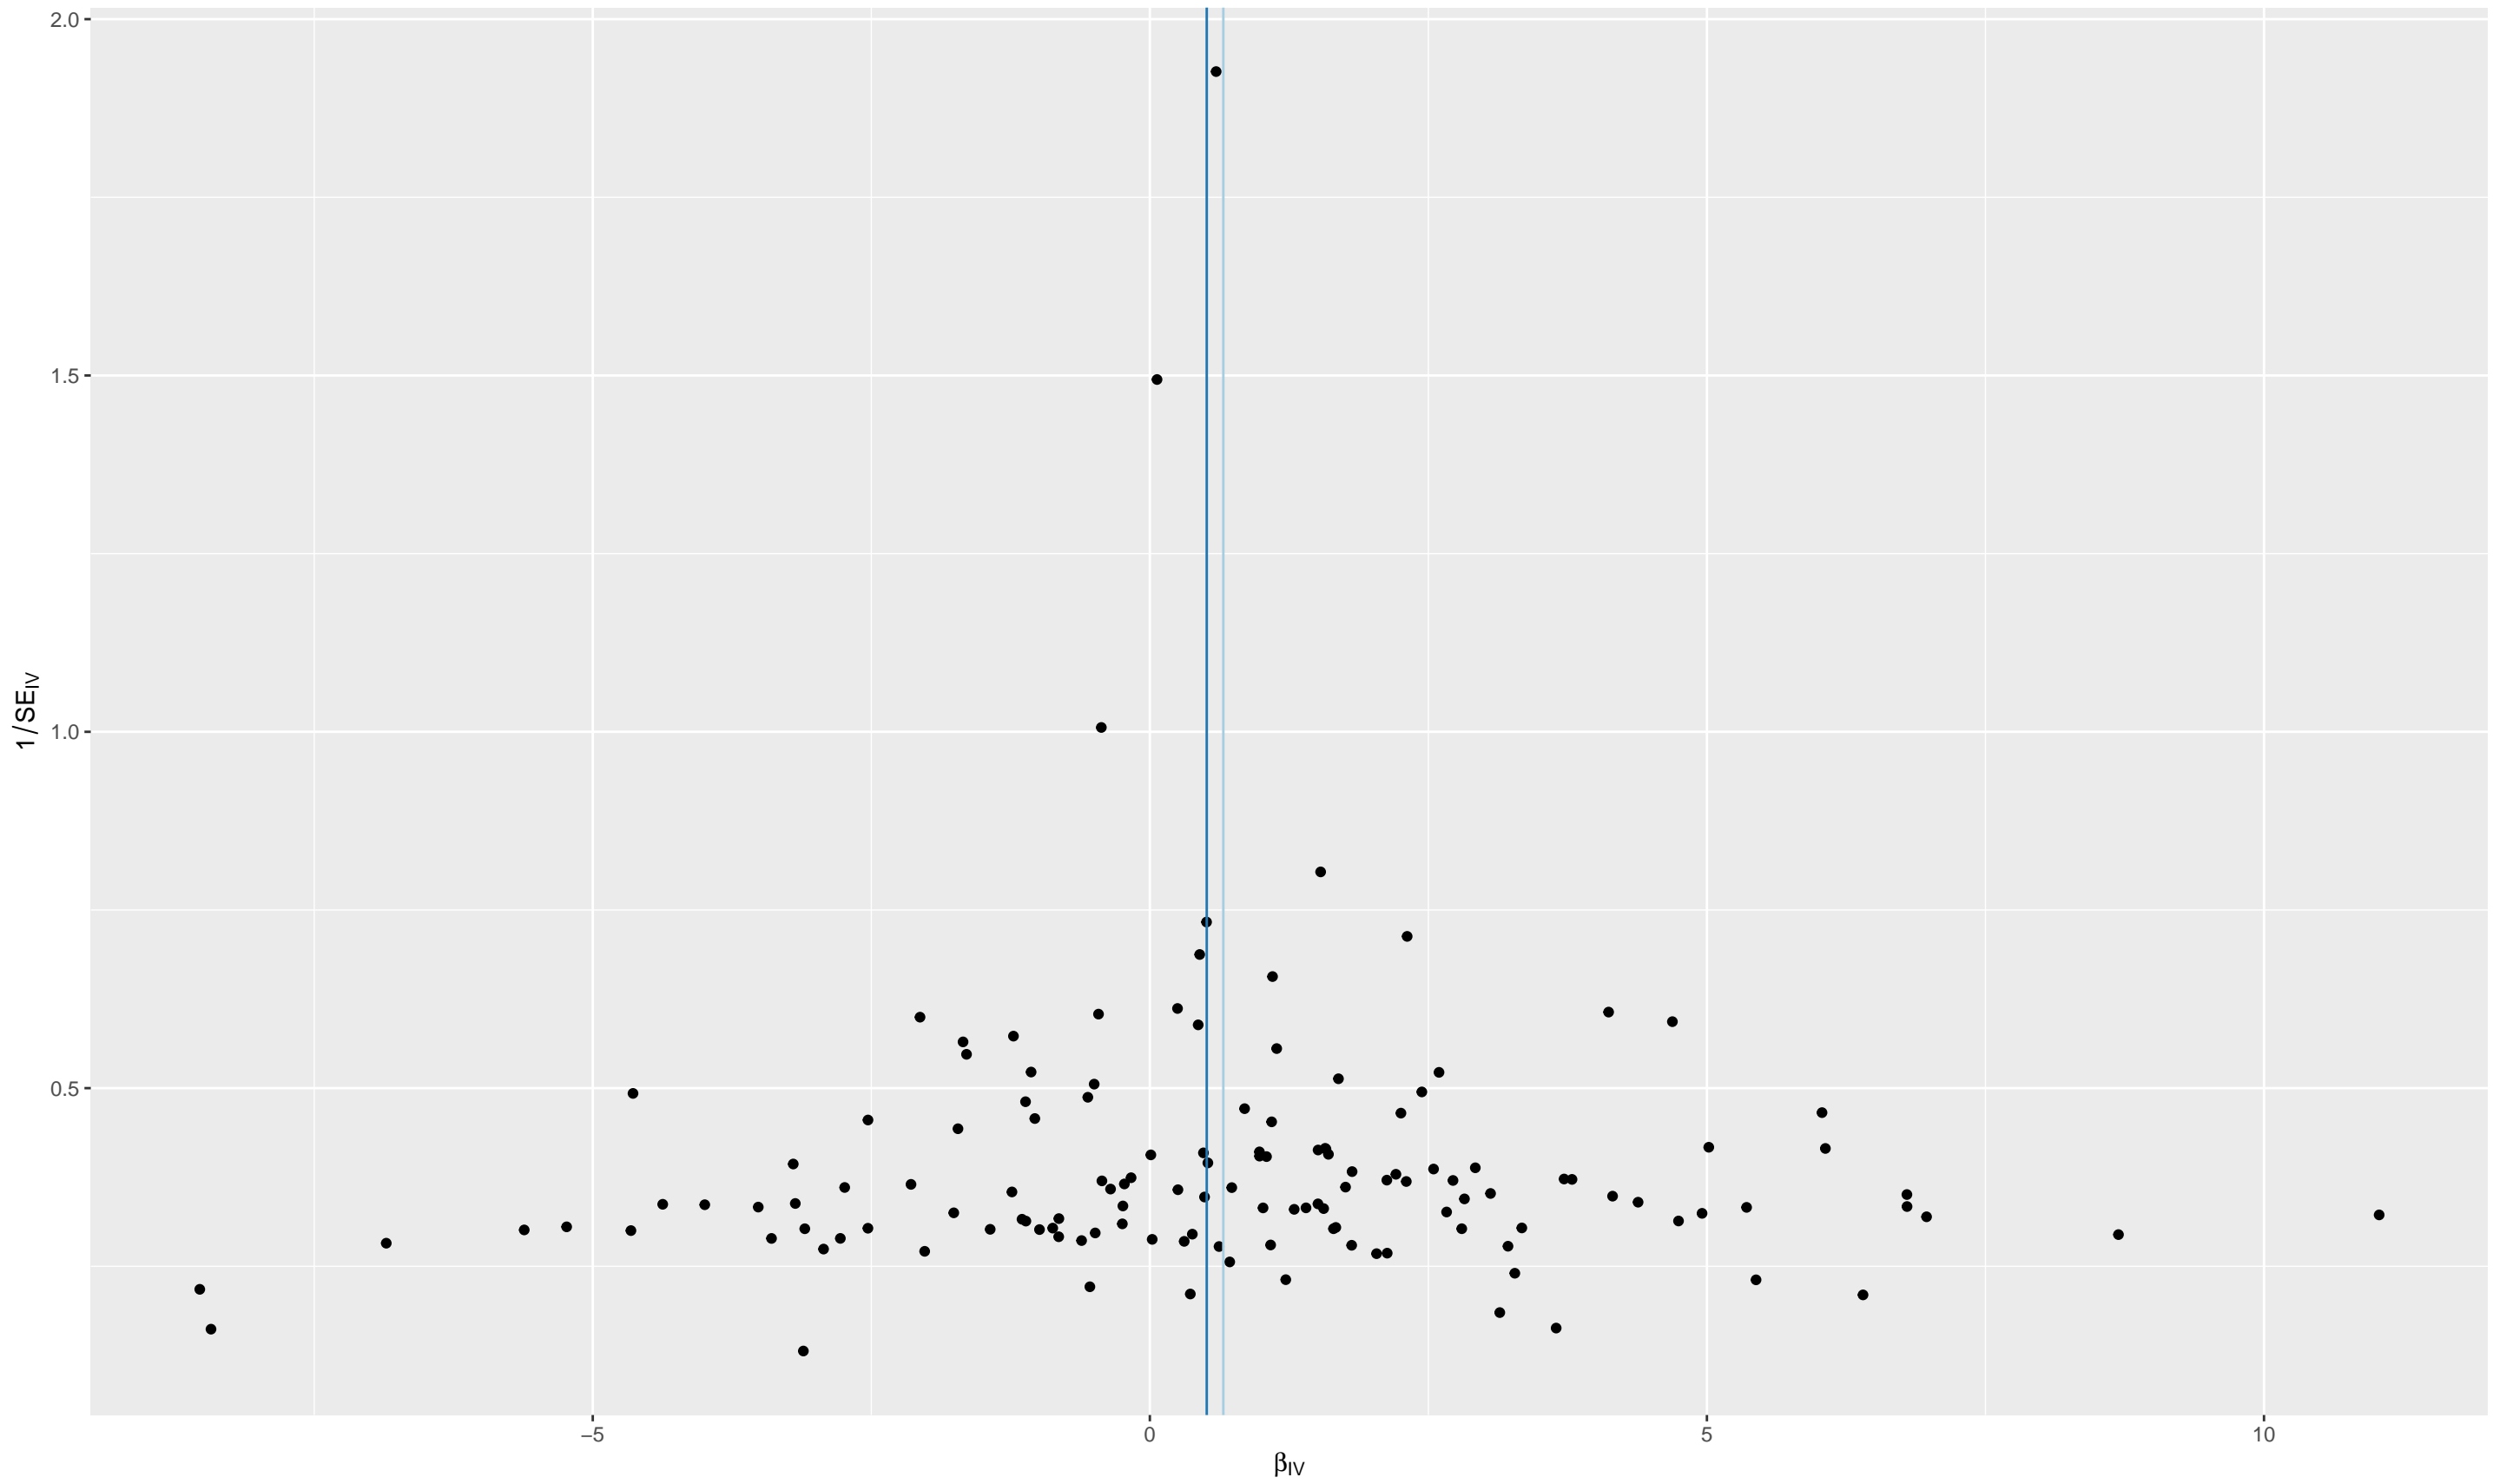

# Forest plot of testosterone level and MAFLD risk

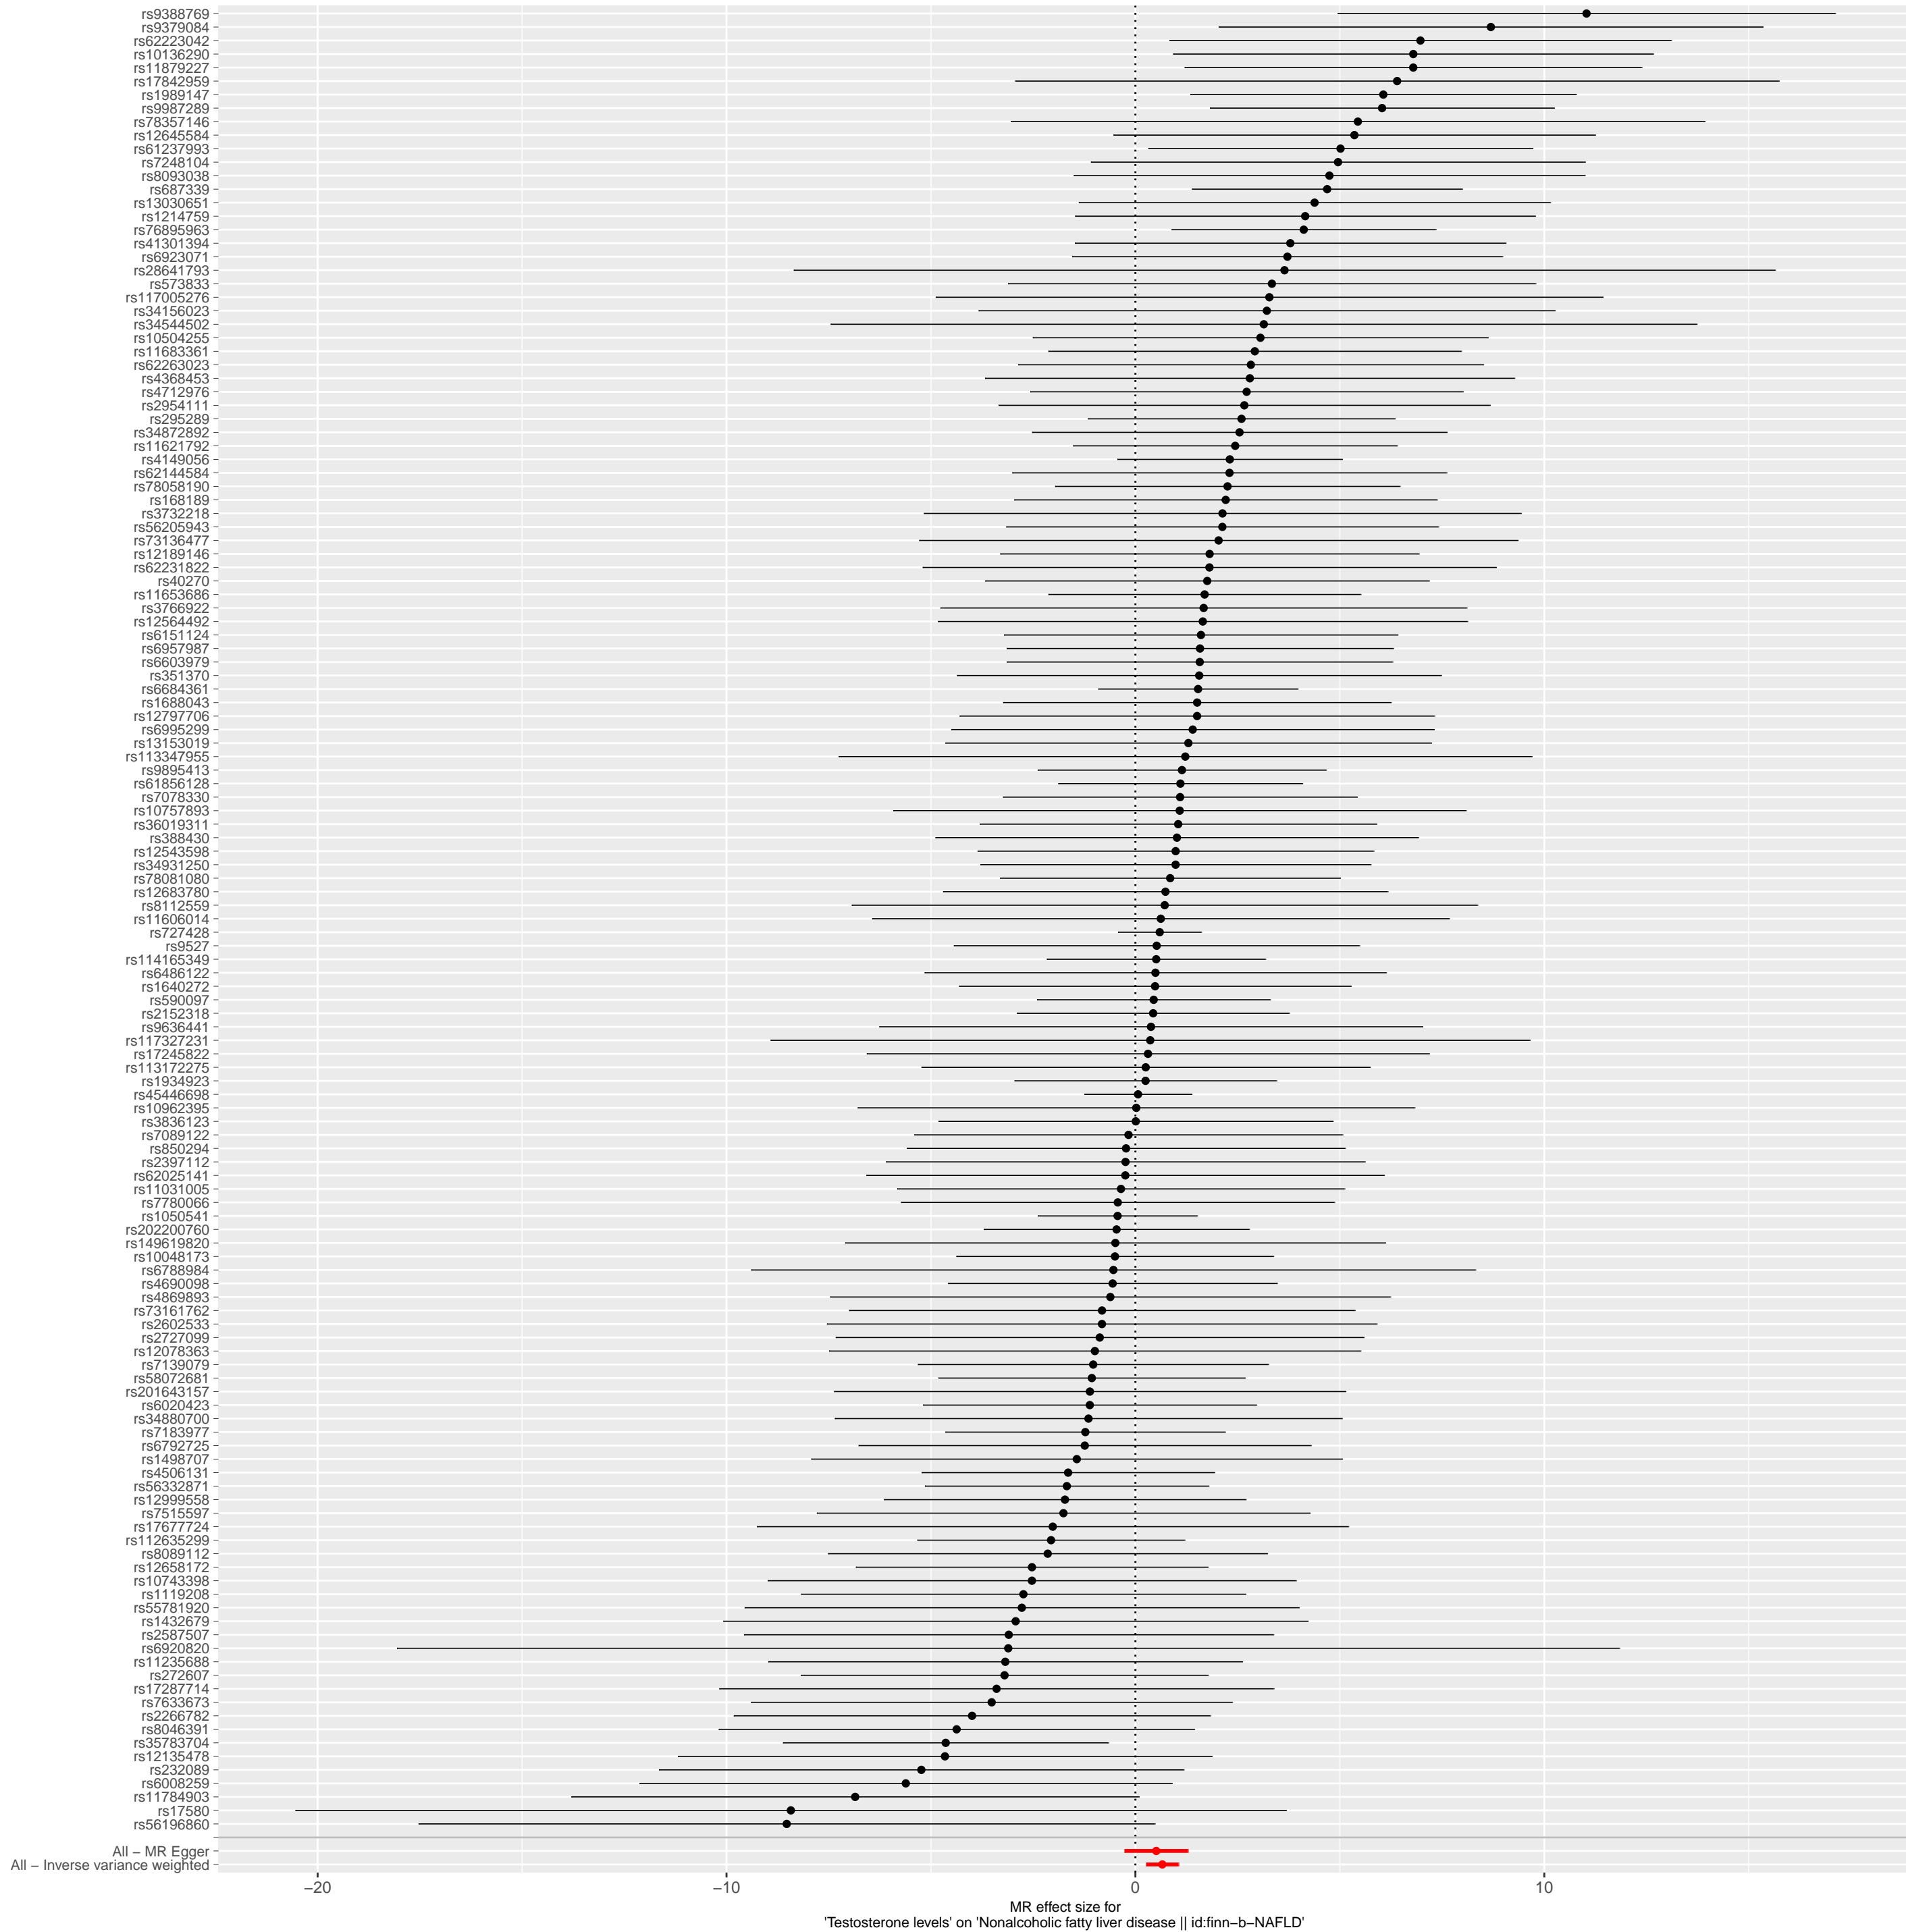

# Sensitivity analysis of the "leave-one-out" method for testosterone level and MAFLD risk

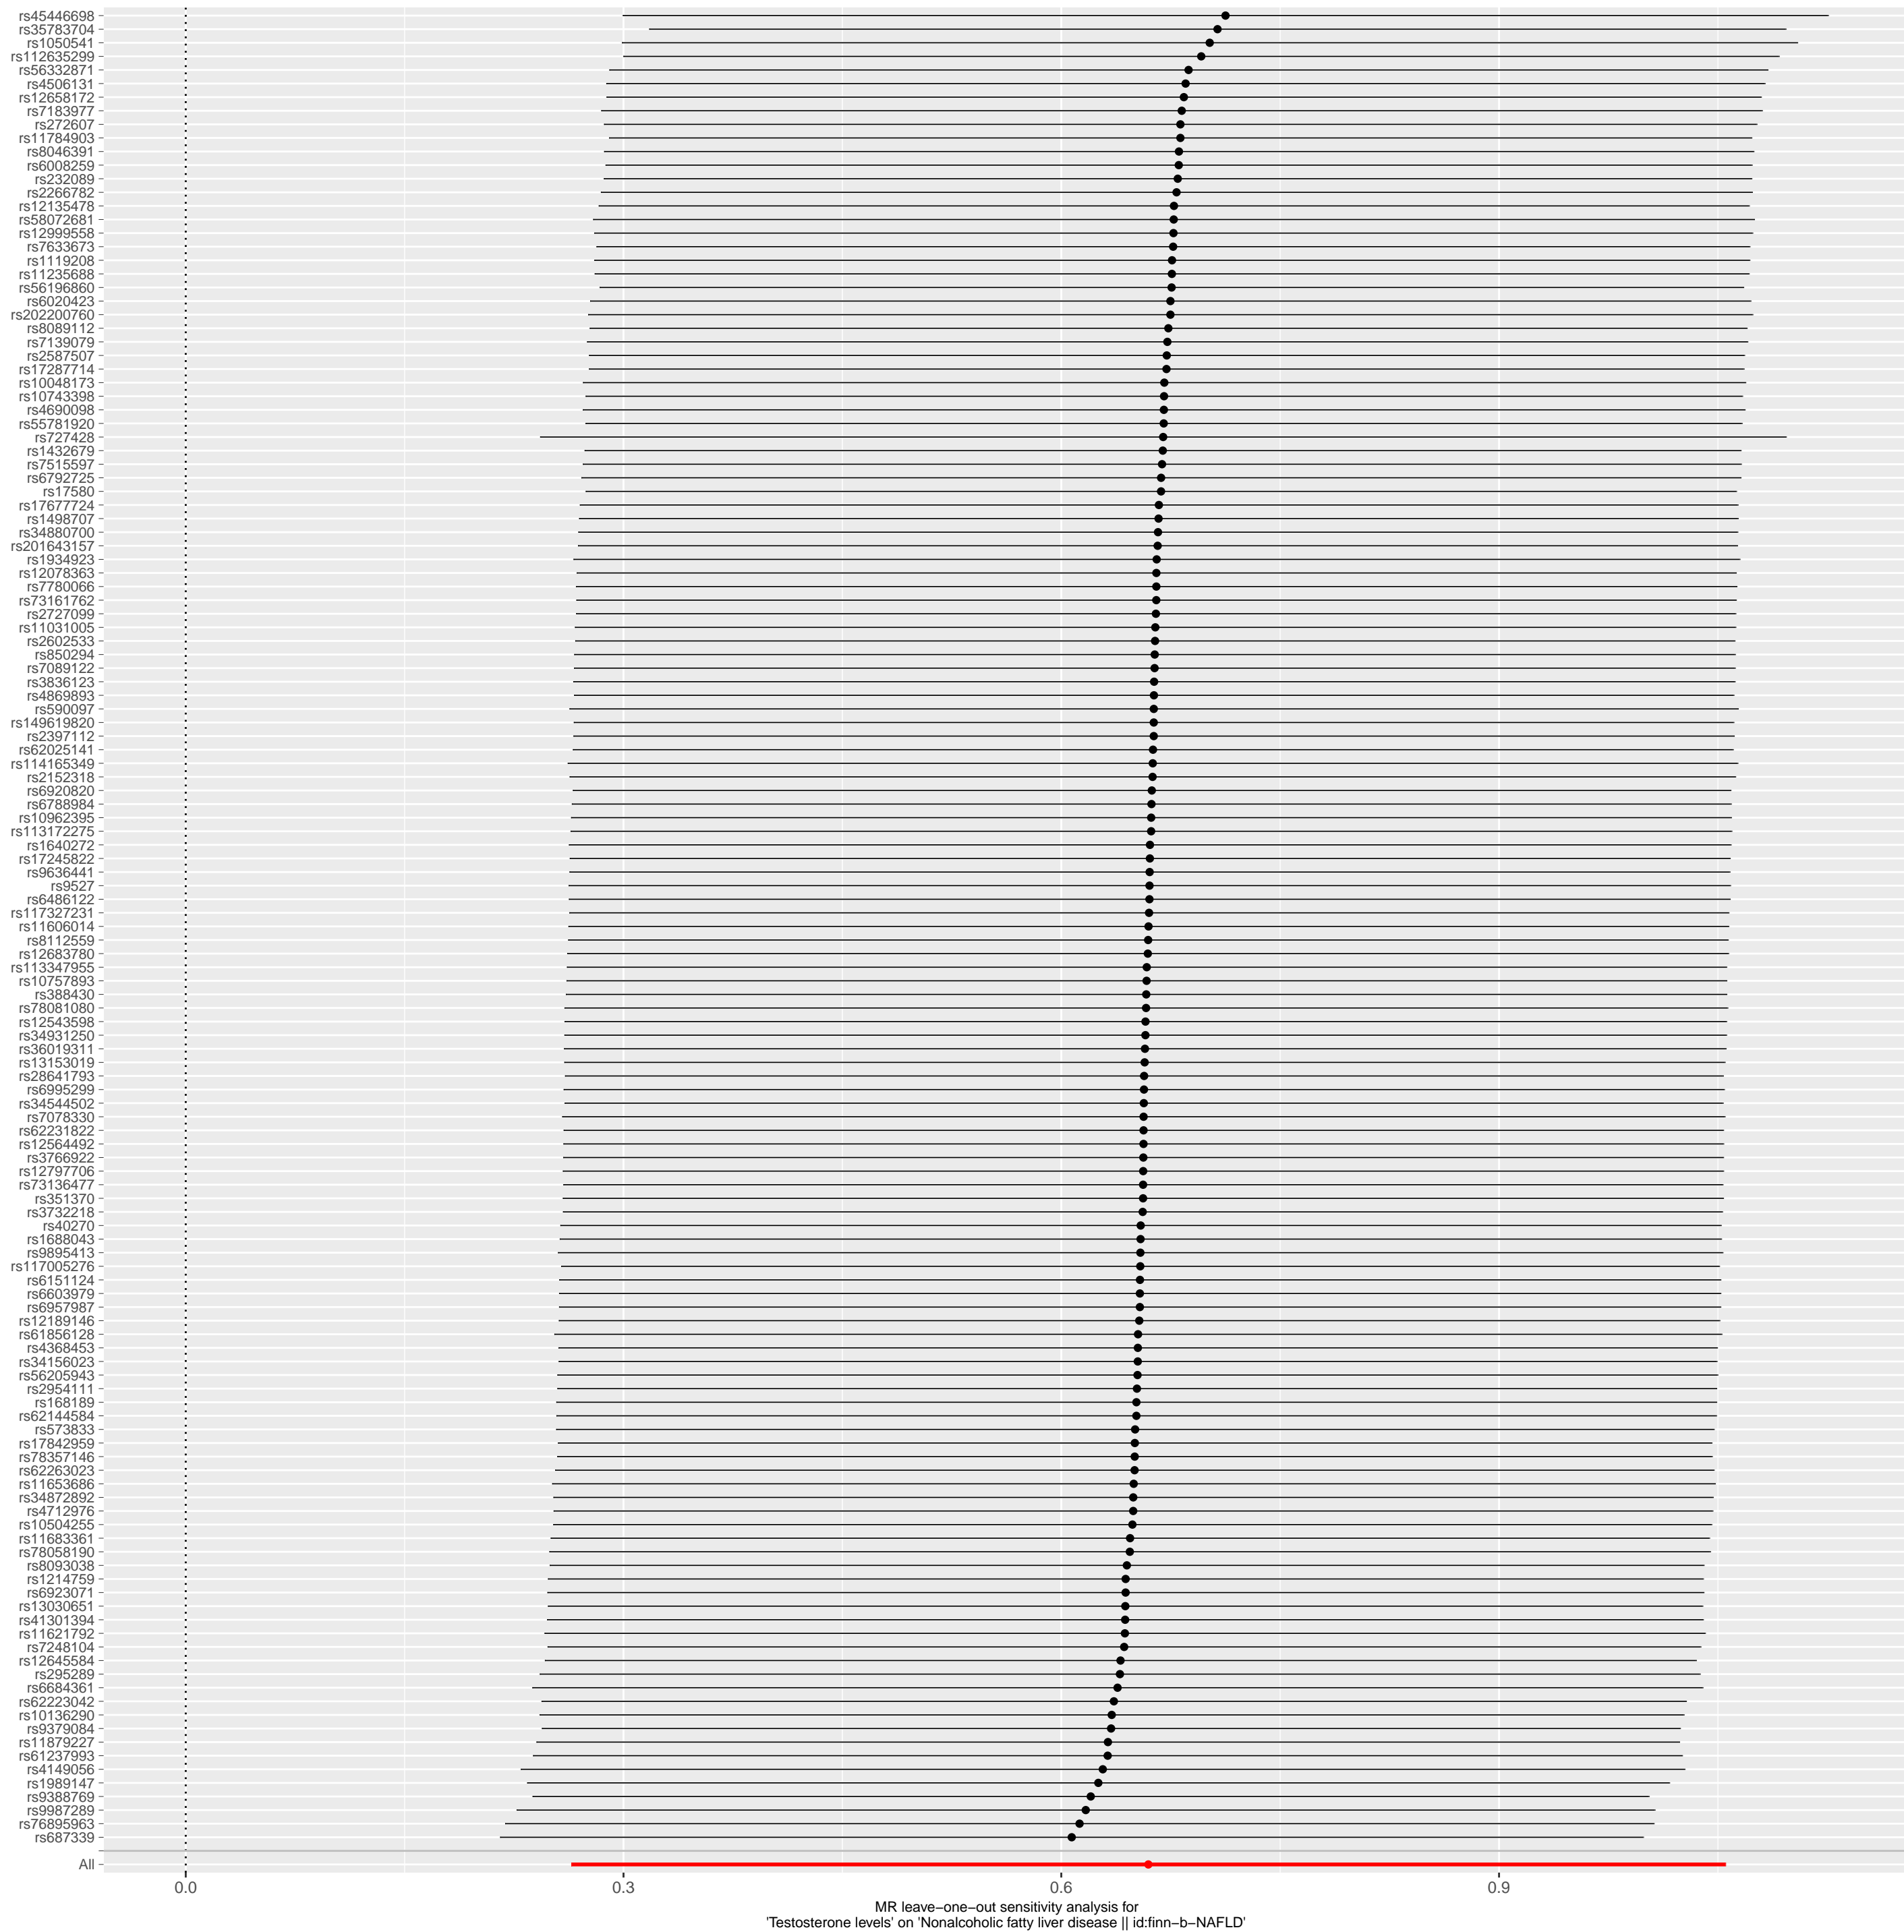

Supplement: MOESM1 [file 25188090]
