# Supplementary material for: Associations between body circumference and testosterone levels and risk of metabolic dysfunction-associated fatty liver disease: a mendelian randomization study
Source: BMC Public Health. 2023 Mar 30;23:602. doi: 10.1186/s12889-023-15467-4 (PMC10061974; doi:10.1186/s12889-023-15467-4)
Supplement: Supplementary file 2 — Basic information of instrumental variables [file 12889_2023_15467_MOESM2_ESM.xls]

## Sheet: Sheet1
Basic information of instrumental variables
Waist Circumference
	SNP	effect_allele.exposure	other_allele.exposure	effect_allele.outcome	other_allele.outcome	beta.exposure	beta.outcome	eaf.exposure	eaf.outcome	remove	palindromic	ambiguous	id.outcome	chr	pos	se.outcome	samplesize.outcome	pval.outcome	outcome	originalname.outcome	outcome.deprecated	mr_keep.outcome	data_source.outcome	proxy.outcome	target_snp.outcome	proxy_snp.outcome	target_a1.outcome	target_a2.outcome	proxy_a1.outcome	proxy_a2.outcome	se.exposure	pval.exposure	exposure	mr_keep.exposure	pval_origin.exposure	id.exposure	data_source.exposure	action	mr_keep
1	rs10100245	A	G	A	G	0.0150449	0.0094	0.56644	0.5281	FALSE	FALSE	FALSE	finn-b-NAFLD	8	77226919	0.0479	#N/A	0.8443	Nonalcoholic fatty liver disease || id:finn-b-NAFLD	Nonalcoholic fatty liver disease	Nonalcoholic fatty liver disease || ||	TRUE	igd	#N/A	#N/A	#N/A	#N/A	#N/A	#N/A	#N/A	0.00216949	4.08e-12	Waist circumference	TRUE	reported	ju9VE2	textfile	2	TRUE
2	rs10128597	A	G	A	G	-0.0163094	-0.1026	0.274019	0.2645	FALSE	FALSE	FALSE	finn-b-NAFLD	11	8694830	0.0545	#N/A	0.0600302	Nonalcoholic fatty liver disease || id:finn-b-NAFLD	Nonalcoholic fatty liver disease	Nonalcoholic fatty liver disease || ||	TRUE	igd	#N/A	#N/A	#N/A	#N/A	#N/A	#N/A	#N/A	0.00242631	1.8e-11	Waist circumference	TRUE	reported	ju9VE2	textfile	2	TRUE
3	rs10172196	A	G	A	G	0.0140208	-0.0415	0.304839	0.3351	FALSE	FALSE	FALSE	finn-b-NAFLD	2	36780549	0.051	#N/A	0.4155	Nonalcoholic fatty liver disease || id:finn-b-NAFLD	Nonalcoholic fatty liver disease	Nonalcoholic fatty liver disease || ||	TRUE	igd	#N/A	#N/A	#N/A	#N/A	#N/A	#N/A	#N/A	0.00234352	2.2e-09	Waist circumference	TRUE	reported	ju9VE2	textfile	2	TRUE
4	rs1019240	T	A	T	A	0.0125924	0.0646	0.64364	0.6032	FALSE	TRUE	FALSE	finn-b-NAFLD	9	122972617	0.049	#N/A	0.1875	Nonalcoholic fatty liver disease || id:finn-b-NAFLD	Nonalcoholic fatty liver disease	Nonalcoholic fatty liver disease || ||	TRUE	igd	TRUE	rs1019240	rs4836809	A	T	C	A	0.00225438	2.33e-08	Waist circumference	TRUE	reported	ju9VE2	textfile	2	TRUE
5	rs10236214	T	C	T	C	0.0145481	-0.0286	0.641403	0.6957	FALSE	FALSE	FALSE	finn-b-NAFLD	7	150668070	0.0522	#N/A	0.584201	Nonalcoholic fatty liver disease || id:finn-b-NAFLD	Nonalcoholic fatty liver disease	Nonalcoholic fatty liver disease || ||	TRUE	igd	#N/A	#N/A	#N/A	#N/A	#N/A	#N/A	#N/A	0.00225631	1.14e-10	Waist circumference	TRUE	reported	ju9VE2	textfile	2	TRUE
6	rs10423928	A	T	A	T	-0.0260287	-0.1375	0.19349	0.2563	FALSE	TRUE	FALSE	finn-b-NAFLD	19	46182304	0.0548	#N/A	0.0121001	Nonalcoholic fatty liver disease || id:finn-b-NAFLD	Nonalcoholic fatty liver disease	Nonalcoholic fatty liver disease || ||	TRUE	igd	#N/A	#N/A	#N/A	#N/A	#N/A	#N/A	#N/A	0.00271482	9.07e-22	Waist circumference	TRUE	reported	ju9VE2	textfile	2	TRUE
7	rs1056441	C	T	C	T	0.0128077	0.0072	0.673163	0.7437	FALSE	FALSE	FALSE	finn-b-NAFLD	20	62370349	0.0547	#N/A	0.8952	Nonalcoholic fatty liver disease || id:finn-b-NAFLD	Nonalcoholic fatty liver disease	Nonalcoholic fatty liver disease || ||	TRUE	igd	#N/A	#N/A	#N/A	#N/A	#N/A	#N/A	#N/A	0.00229345	2.35e-08	Waist circumference	TRUE	reported	ju9VE2	textfile	2	TRUE
8	rs10787738	T	C	T	C	0.0174812	0.0495	0.253303	0.2554	FALSE	FALSE	FALSE	finn-b-NAFLD	10	118777371	0.0551	#N/A	0.3687	Nonalcoholic fatty liver disease || id:finn-b-NAFLD	Nonalcoholic fatty liver disease	Nonalcoholic fatty liver disease || ||	TRUE	igd	#N/A	#N/A	#N/A	#N/A	#N/A	#N/A	#N/A	0.00250799	3.17e-12	Waist circumference	TRUE	reported	ju9VE2	textfile	2	TRUE
9	rs10803762	A	G	A	G	0.0144744	0.0305	0.678865	0.7076	FALSE	FALSE	FALSE	finn-b-NAFLD	2	161105876	0.0526	#N/A	0.562501	Nonalcoholic fatty liver disease || id:finn-b-NAFLD	Nonalcoholic fatty liver disease	Nonalcoholic fatty liver disease || ||	TRUE	igd	#N/A	#N/A	#N/A	#N/A	#N/A	#N/A	#N/A	0.00231166	3.82e-10	Waist circumference	TRUE	reported	ju9VE2	textfile	2	TRUE
10	rs10938398	A	G	A	G	0.0207366	0.0763	0.433341	0.4731	FALSE	FALSE	FALSE	finn-b-NAFLD	4	45186139	0.0479	#N/A	0.111	Nonalcoholic fatty liver disease || id:finn-b-NAFLD	Nonalcoholic fatty liver disease	Nonalcoholic fatty liver disease || ||	TRUE	igd	#N/A	#N/A	#N/A	#N/A	#N/A	#N/A	#N/A	0.00217734	1.68e-21	Waist circumference	TRUE	reported	ju9VE2	textfile	2	TRUE
11	rs10957088	C	T	C	T	0.0163282	0.1198	0.160061	0.2483	FALSE	FALSE	FALSE	finn-b-NAFLD	8	60220457	0.0554	#N/A	0.0305401	Nonalcoholic fatty liver disease || id:finn-b-NAFLD	Nonalcoholic fatty liver disease	Nonalcoholic fatty liver disease || ||	TRUE	igd	#N/A	#N/A	#N/A	#N/A	#N/A	#N/A	#N/A	0.00293621	2.68e-08	Waist circumference	TRUE	reported	ju9VE2	textfile	2	TRUE
12	rs10992841	T	C	T	C	-0.0136489	0.0445	0.68488	0.6541	FALSE	FALSE	FALSE	finn-b-NAFLD	9	96430115	0.0504	#N/A	0.3768	Nonalcoholic fatty liver disease || id:finn-b-NAFLD	Nonalcoholic fatty liver disease	Nonalcoholic fatty liver disease || ||	TRUE	igd	#N/A	#N/A	#N/A	#N/A	#N/A	#N/A	#N/A	0.00232451	4.32e-09	Waist circumference	TRUE	reported	ju9VE2	textfile	2	TRUE
13	rs11039266	G	T	G	T	-0.021681	-0.0672	0.277975	0.1891	FALSE	FALSE	FALSE	finn-b-NAFLD	11	47532395	0.0615	#N/A	0.2742	Nonalcoholic fatty liver disease || id:finn-b-NAFLD	Nonalcoholic fatty liver disease	Nonalcoholic fatty liver disease || ||	TRUE	igd	#N/A	#N/A	#N/A	#N/A	#N/A	#N/A	#N/A	0.00239802	1.56e-19	Waist circumference	TRUE	reported	ju9VE2	textfile	2	TRUE
14	rs11099020	T	C	T	C	-0.0126065	0.0024	0.642739	0.6043	FALSE	FALSE	FALSE	finn-b-NAFLD	4	130724902	0.0492	#N/A	0.961	Nonalcoholic fatty liver disease || id:finn-b-NAFLD	Nonalcoholic fatty liver disease	Nonalcoholic fatty liver disease || ||	TRUE	igd	#N/A	#N/A	#N/A	#N/A	#N/A	#N/A	#N/A	0.00224865	2.07e-08	Waist circumference	TRUE	reported	ju9VE2	textfile	2	TRUE
15	rs11150745	G	A	G	A	-0.0163767	-0.0628	0.319489	0.2798	FALSE	FALSE	FALSE	finn-b-NAFLD	17	78757626	0.0533	#N/A	0.2389	Nonalcoholic fatty liver disease || id:finn-b-NAFLD	Nonalcoholic fatty liver disease	Nonalcoholic fatty liver disease || ||	TRUE	igd	#N/A	#N/A	#N/A	#N/A	#N/A	#N/A	#N/A	0.00230943	1.33e-12	Waist circumference	TRUE	reported	ju9VE2	textfile	2	TRUE
16	rs111640872	C	G	C	G	0.0195885	-0.0706	0.331076	0.3534	FALSE	TRUE	FALSE	finn-b-NAFLD	19	30290357	0.0502	#N/A	0.1595	Nonalcoholic fatty liver disease || id:finn-b-NAFLD	Nonalcoholic fatty liver disease	Nonalcoholic fatty liver disease || ||	TRUE	igd	#N/A	#N/A	#N/A	#N/A	#N/A	#N/A	#N/A	0.00229116	1.24e-17	Waist circumference	TRUE	reported	ju9VE2	textfile	2	TRUE
17	rs11208779	C	G	C	G	0.0129711	0.0253	0.531674	0.5663	FALSE	TRUE	TRUE	finn-b-NAFLD	1	66417145	0.0483	#N/A	0.6003	Nonalcoholic fatty liver disease || id:finn-b-NAFLD	Nonalcoholic fatty liver disease	Nonalcoholic fatty liver disease || ||	TRUE	igd	#N/A	#N/A	#N/A	#N/A	#N/A	#N/A	#N/A	0.00216129	1.96e-09	Waist circumference	TRUE	reported	ju9VE2	textfile	2	FALSE
18	rs112566467	T	C	T	C	0.0181268	-0.0152	0.213344	0.196	FALSE	FALSE	FALSE	finn-b-NAFLD	1	39562627	0.0604	#N/A	0.8019	Nonalcoholic fatty liver disease || id:finn-b-NAFLD	Nonalcoholic fatty liver disease	Nonalcoholic fatty liver disease || ||	TRUE	igd	#N/A	#N/A	#N/A	#N/A	#N/A	#N/A	#N/A	0.00264517	7.25e-12	Waist circumference	TRUE	reported	ju9VE2	textfile	2	TRUE
19	rs11474838	G	T	G	T	0.0133441	0.0338	0.432734	0.4516	FALSE	FALSE	FALSE	finn-b-NAFLD	20	25458297	0.048	#N/A	0.481599	Nonalcoholic fatty liver disease || id:finn-b-NAFLD	Nonalcoholic fatty liver disease	Nonalcoholic fatty liver disease || ||	TRUE	igd	TRUE	rs11474838	rs417110	G	T	C	T	0.00221385	1.67e-09	Waist circumference	TRUE	reported	ju9VE2	textfile	2	TRUE
20	rs1154988	A	T	A	T	0.0175068	0.1869	0.773838	0.8517	FALSE	TRUE	FALSE	finn-b-NAFLD	3	135925191	0.0673	#N/A	0.00547205	Nonalcoholic fatty liver disease || id:finn-b-NAFLD	Nonalcoholic fatty liver disease	Nonalcoholic fatty liver disease || ||	TRUE	igd	#N/A	#N/A	#N/A	#N/A	#N/A	#N/A	#N/A	0.00257031	9.7e-12	Waist circumference	TRUE	reported	ju9VE2	textfile	2	TRUE
21	rs1159974	C	T	C	T	0.0126505	0.1	0.527559	0.507	FALSE	FALSE	FALSE	finn-b-NAFLD	6	126090277	0.0479	#N/A	0.0368299	Nonalcoholic fatty liver disease || id:finn-b-NAFLD	Nonalcoholic fatty liver disease	Nonalcoholic fatty liver disease || ||	TRUE	igd	#N/A	#N/A	#N/A	#N/A	#N/A	#N/A	#N/A	0.0021527	4.19e-09	Waist circumference	TRUE	reported	ju9VE2	textfile	2	TRUE
22	rs11636611	T	C	T	C	0.0125288	-0.0112	0.503126	0.4905	FALSE	FALSE	FALSE	finn-b-NAFLD	15	36391965	0.0478	#N/A	0.8152	Nonalcoholic fatty liver disease || id:finn-b-NAFLD	Nonalcoholic fatty liver disease	Nonalcoholic fatty liver disease || ||	TRUE	igd	#N/A	#N/A	#N/A	#N/A	#N/A	#N/A	#N/A	0.00215496	6.11e-09	Waist circumference	TRUE	reported	ju9VE2	textfile	2	TRUE
23	rs11642015	T	C	T	C	0.0563414	0.0767	0.40236	0.4189	FALSE	FALSE	FALSE	finn-b-NAFLD	16	53802494	0.0484	#N/A	0.1128	Nonalcoholic fatty liver disease || id:finn-b-NAFLD	Nonalcoholic fatty liver disease	Nonalcoholic fatty liver disease || ||	TRUE	igd	#N/A	#N/A	#N/A	#N/A	#N/A	#N/A	#N/A	0.00219182	1.41e-145	Waist circumference	TRUE	reported	ju9VE2	textfile	2	TRUE
24	rs11653367	G	A	G	A	-0.0180212	-0.0427	0.325763	0.3599	FALSE	FALSE	FALSE	finn-b-NAFLD	17	44191483	0.0502	#N/A	0.3949	Nonalcoholic fatty liver disease || id:finn-b-NAFLD	Nonalcoholic fatty liver disease	Nonalcoholic fatty liver disease || ||	TRUE	igd	#N/A	#N/A	#N/A	#N/A	#N/A	#N/A	#N/A	0.00230317	5.11e-15	Waist circumference	TRUE	reported	ju9VE2	textfile	2	TRUE
25	rs11666480	G	C	G	C	0.0154676	-0.0034	0.536833	0.5659	FALSE	TRUE	TRUE	finn-b-NAFLD	19	1856554	0.0484	#N/A	0.9442	Nonalcoholic fatty liver disease || id:finn-b-NAFLD	Nonalcoholic fatty liver disease	Nonalcoholic fatty liver disease || ||	TRUE	igd	#N/A	#N/A	#N/A	#N/A	#N/A	#N/A	#N/A	0.00216606	9.29e-13	Waist circumference	TRUE	reported	ju9VE2	textfile	2	FALSE
26	rs11757278	C	T	C	T	-0.0140028	-0.0121	0.305848	0.3904	FALSE	FALSE	FALSE	finn-b-NAFLD	6	13180454	0.049	#N/A	0.8043	Nonalcoholic fatty liver disease || id:finn-b-NAFLD	Nonalcoholic fatty liver disease	Nonalcoholic fatty liver disease || ||	TRUE	igd	#N/A	#N/A	#N/A	#N/A	#N/A	#N/A	#N/A	0.00233576	2.04e-09	Waist circumference	TRUE	reported	ju9VE2	textfile	2	TRUE
27	rs11764337	T	C	T	C	-0.0152814	-0.0456	0.183248	0.2634	FALSE	FALSE	FALSE	finn-b-NAFLD	7	1892309	0.0543	#N/A	0.4013	Nonalcoholic fatty liver disease || id:finn-b-NAFLD	Nonalcoholic fatty liver disease	Nonalcoholic fatty liver disease || ||	TRUE	igd	#N/A	#N/A	#N/A	#N/A	#N/A	#N/A	#N/A	0.00278852	4.25e-08	Waist circumference	TRUE	reported	ju9VE2	textfile	2	TRUE
28	rs1182199	A	C	A	C	-0.0160465	-0.0262	0.305066	0.3615	FALSE	FALSE	FALSE	finn-b-NAFLD	7	2862542	0.0498	#N/A	0.5983	Nonalcoholic fatty liver disease || id:finn-b-NAFLD	Nonalcoholic fatty liver disease	Nonalcoholic fatty liver disease || ||	TRUE	igd	#N/A	#N/A	#N/A	#N/A	#N/A	#N/A	#N/A	0.002337	6.6e-12	Waist circumference	TRUE	reported	ju9VE2	textfile	2	TRUE
29	rs11824092	C	T	C	T	0.0134159	0.0185	0.637451	0.5397	FALSE	FALSE	FALSE	finn-b-NAFLD	11	13346294	0.0481	#N/A	0.7006	Nonalcoholic fatty liver disease || id:finn-b-NAFLD	Nonalcoholic fatty liver disease	Nonalcoholic fatty liver disease || ||	TRUE	igd	#N/A	#N/A	#N/A	#N/A	#N/A	#N/A	#N/A	0.0022508	2.52e-09	Waist circumference	TRUE	reported	ju9VE2	textfile	2	TRUE
30	rs1184570	T	C	T	C	-0.0134818	-0.0443	0.525433	0.5141	FALSE	FALSE	FALSE	finn-b-NAFLD	6	83388343	0.0478	#N/A	0.3537	Nonalcoholic fatty liver disease || id:finn-b-NAFLD	Nonalcoholic fatty liver disease	Nonalcoholic fatty liver disease || ||	TRUE	igd	#N/A	#N/A	#N/A	#N/A	#N/A	#N/A	#N/A	0.00215343	3.84e-10	Waist circumference	TRUE	reported	ju9VE2	textfile	2	TRUE
31	rs11878477	G	A	G	A	-0.0144808	-0.0905	0.503551	0.551	FALSE	FALSE	FALSE	finn-b-NAFLD	19	18837993	0.0482	#N/A	0.0601105	Nonalcoholic fatty liver disease || id:finn-b-NAFLD	Nonalcoholic fatty liver disease	Nonalcoholic fatty liver disease || ||	TRUE	igd	#N/A	#N/A	#N/A	#N/A	#N/A	#N/A	#N/A	0.00215797	1.94e-11	Waist circumference	TRUE	reported	ju9VE2	textfile	2	TRUE
32	rs12128526	A	G	A	G	0.0119797	-0.0036	0.459975	0.5077	FALSE	FALSE	FALSE	finn-b-NAFLD	1	7723957	0.048	#N/A	0.9397	Nonalcoholic fatty liver disease || id:finn-b-NAFLD	Nonalcoholic fatty liver disease	Nonalcoholic fatty liver disease || ||	TRUE	igd	#N/A	#N/A	#N/A	#N/A	#N/A	#N/A	#N/A	0.00216039	2.94e-08	Waist circumference	TRUE	reported	ju9VE2	textfile	2	TRUE
33	rs12140153	T	G	T	G	-0.0252672	-0.0925	0.0967607	0.07886	FALSE	FALSE	FALSE	finn-b-NAFLD	1	62579891	0.0892	#N/A	0.2995	Nonalcoholic fatty liver disease || id:finn-b-NAFLD	Nonalcoholic fatty liver disease	Nonalcoholic fatty liver disease || ||	TRUE	igd	#N/A	#N/A	#N/A	#N/A	#N/A	#N/A	#N/A	0.00373213	1.29e-11	Waist circumference	TRUE	reported	ju9VE2	textfile	2	TRUE
34	rs1218824	A	G	A	G	0.0129214	0.0276	0.66205	0.6669	FALSE	FALSE	FALSE	finn-b-NAFLD	13	28010734	0.0508	#N/A	0.5872	Nonalcoholic fatty liver disease || id:finn-b-NAFLD	Nonalcoholic fatty liver disease	Nonalcoholic fatty liver disease || ||	TRUE	igd	#N/A	#N/A	#N/A	#N/A	#N/A	#N/A	#N/A	0.00227409	1.33e-08	Waist circumference	TRUE	reported	ju9VE2	textfile	2	TRUE
35	rs12335914	C	G	C	G	0.0139242	0.11	0.475611	0.494	FALSE	TRUE	TRUE	finn-b-NAFLD	9	92209151	0.0479	#N/A	0.0214699	Nonalcoholic fatty liver disease || id:finn-b-NAFLD	Nonalcoholic fatty liver disease	Nonalcoholic fatty liver disease || ||	TRUE	igd	#N/A	#N/A	#N/A	#N/A	#N/A	#N/A	#N/A	0.0021576	1.09e-10	Waist circumference	TRUE	reported	ju9VE2	textfile	2	FALSE
36	rs12367809	T	C	T	C	0.0218046	0.0264	0.368275	0.3835	FALSE	FALSE	FALSE	finn-b-NAFLD	12	50256063	0.0494	#N/A	0.5931	Nonalcoholic fatty liver disease || id:finn-b-NAFLD	Nonalcoholic fatty liver disease	Nonalcoholic fatty liver disease || ||	TRUE	igd	#N/A	#N/A	#N/A	#N/A	#N/A	#N/A	#N/A	0.00223898	2.08e-22	Waist circumference	TRUE	reported	ju9VE2	textfile	2	TRUE
37	rs12375196	A	C	A	C	0.0133717	0.0139	0.424318	0.4658	FALSE	FALSE	FALSE	finn-b-NAFLD	7	103416541	0.048	#N/A	0.772899	Nonalcoholic fatty liver disease || id:finn-b-NAFLD	Nonalcoholic fatty liver disease	Nonalcoholic fatty liver disease || ||	TRUE	igd	#N/A	#N/A	#N/A	#N/A	#N/A	#N/A	#N/A	0.00218693	9.7e-10	Waist circumference	TRUE	reported	ju9VE2	textfile	2	TRUE
38	rs12619178	T	C	T	C	-0.0150737	-0.0155	0.402922	0.4072	FALSE	FALSE	FALSE	finn-b-NAFLD	2	100838157	0.0487	#N/A	0.7502	Nonalcoholic fatty liver disease || id:finn-b-NAFLD	Nonalcoholic fatty liver disease	Nonalcoholic fatty liver disease || ||	TRUE	igd	#N/A	#N/A	#N/A	#N/A	#N/A	#N/A	#N/A	0.00219213	6.15e-12	Waist circumference	TRUE	reported	ju9VE2	textfile	2	TRUE
39	rs12679106	T	G	T	G	-0.0218821	0.0119	0.711341	0.7346	FALSE	FALSE	FALSE	finn-b-NAFLD	8	73443198	0.0541	#N/A	0.8255	Nonalcoholic fatty liver disease || id:finn-b-NAFLD	Nonalcoholic fatty liver disease	Nonalcoholic fatty liver disease || ||	TRUE	igd	#N/A	#N/A	#N/A	#N/A	#N/A	#N/A	#N/A	0.00238599	4.71e-20	Waist circumference	TRUE	reported	ju9VE2	textfile	2	TRUE
40	rs12680342	G	T	G	T	-0.0143433	-0.0413	0.229104	0.2767	FALSE	FALSE	FALSE	finn-b-NAFLD	8	95359638	0.0534	#N/A	0.4394	Nonalcoholic fatty liver disease || id:finn-b-NAFLD	Nonalcoholic fatty liver disease	Nonalcoholic fatty liver disease || ||	TRUE	igd	#N/A	#N/A	#N/A	#N/A	#N/A	#N/A	#N/A	0.00255577	2e-08	Waist circumference	TRUE	reported	ju9VE2	textfile	2	TRUE
41	rs12806052	T	C	T	C	-0.0188997	-0.0841	0.165485	0.1378	FALSE	FALSE	FALSE	finn-b-NAFLD	11	134518868	0.0693	#N/A	0.225	Nonalcoholic fatty liver disease || id:finn-b-NAFLD	Nonalcoholic fatty liver disease	Nonalcoholic fatty liver disease || ||	TRUE	igd	#N/A	#N/A	#N/A	#N/A	#N/A	#N/A	#N/A	0.00289848	7.01e-11	Waist circumference	TRUE	reported	ju9VE2	textfile	2	TRUE
42	rs12926311	C	G	A	G	-0.0141836	0.1567	0.355425	0.00125	TRUE	TRUE	FALSE	finn-b-NAFLD	16	406427	0.8194	#N/A	0.8483	Nonalcoholic fatty liver disease || id:finn-b-NAFLD	Nonalcoholic fatty liver disease	Nonalcoholic fatty liver disease || ||	TRUE	igd	#N/A	#N/A	#N/A	#N/A	#N/A	#N/A	#N/A	0.00225378	3.11e-10	Waist circumference	TRUE	reported	ju9VE2	textfile	2	FALSE
43	rs12926311	C	G	C	G	-0.0141836	0.0575	0.355425	0.2954	FALSE	TRUE	FALSE	finn-b-NAFLD	16	406427	0.0527	#N/A	0.2754	Nonalcoholic fatty liver disease || id:finn-b-NAFLD	Nonalcoholic fatty liver disease	Nonalcoholic fatty liver disease || ||	TRUE	igd	#N/A	#N/A	#N/A	#N/A	#N/A	#N/A	#N/A	0.00225378	3.11e-10	Waist circumference	TRUE	reported	ju9VE2	textfile	2	TRUE
44	rs13022337	G	A	G	A	0.0382185	-0.0202	0.828643	0.8365	FALSE	FALSE	FALSE	finn-b-NAFLD	2	632609	0.0647	#N/A	0.7545	Nonalcoholic fatty liver disease || id:finn-b-NAFLD	Nonalcoholic fatty liver disease	Nonalcoholic fatty liver disease || ||	TRUE	igd	#N/A	#N/A	#N/A	#N/A	#N/A	#N/A	#N/A	0.00284978	5.34e-41	Waist circumference	TRUE	reported	ju9VE2	textfile	2	TRUE
45	rs13047416	G	C	G	C	-0.0132224	0.0474	0.375427	0.4892	FALSE	TRUE	TRUE	finn-b-NAFLD	21	40309436	0.048	#N/A	0.3226	Nonalcoholic fatty liver disease || id:finn-b-NAFLD	Nonalcoholic fatty liver disease	Nonalcoholic fatty liver disease || ||	TRUE	igd	#N/A	#N/A	#N/A	#N/A	#N/A	#N/A	#N/A	0.00222813	2.95e-09	Waist circumference	TRUE	reported	ju9VE2	textfile	2	FALSE
46	rs13210406	G	C	G	C	-0.0145777	0.0455	0.29106	0.3361	FALSE	TRUE	FALSE	finn-b-NAFLD	6	97752902	0.0507	#N/A	0.3694	Nonalcoholic fatty liver disease || id:finn-b-NAFLD	Nonalcoholic fatty liver disease	Nonalcoholic fatty liver disease || ||	TRUE	igd	#N/A	#N/A	#N/A	#N/A	#N/A	#N/A	#N/A	0.00237523	8.4e-10	Waist circumference	TRUE	reported	ju9VE2	textfile	2	TRUE
47	rs1321521	A	C	A	C	0.0148253	0.116	0.345785	0.4323	FALSE	FALSE	FALSE	finn-b-NAFLD	6	51771578	0.0483	#N/A	0.0163501	Nonalcoholic fatty liver disease || id:finn-b-NAFLD	Nonalcoholic fatty liver disease	Nonalcoholic fatty liver disease || ||	TRUE	igd	#N/A	#N/A	#N/A	#N/A	#N/A	#N/A	#N/A	0.00225896	5.28e-11	Waist circumference	TRUE	reported	ju9VE2	textfile	2	TRUE
48	rs13264909	T	A	T	A	-0.0126861	0.0314	0.428275	0.4975	FALSE	TRUE	TRUE	finn-b-NAFLD	8	64702385	0.0479	#N/A	0.512201	Nonalcoholic fatty liver disease || id:finn-b-NAFLD	Nonalcoholic fatty liver disease	Nonalcoholic fatty liver disease || ||	TRUE	igd	#N/A	#N/A	#N/A	#N/A	#N/A	#N/A	#N/A	0.00217545	5.5e-09	Waist circumference	TRUE	reported	ju9VE2	textfile	2	FALSE
49	rs13322435	G	A	G	A	-0.0163963	0.046	0.401504	0.3321	FALSE	FALSE	FALSE	finn-b-NAFLD	3	156795468	0.0507	#N/A	0.3649	Nonalcoholic fatty liver disease || id:finn-b-NAFLD	Nonalcoholic fatty liver disease	Nonalcoholic fatty liver disease || ||	TRUE	igd	#N/A	#N/A	#N/A	#N/A	#N/A	#N/A	#N/A	0.00220729	1.1e-13	Waist circumference	TRUE	reported	ju9VE2	textfile	2	TRUE
50	rs13333747	C	T	C	T	-0.0230214	-0.0114	0.181958	0.1804	FALSE	FALSE	FALSE	finn-b-NAFLD	16	2175373	0.0628	#N/A	0.8557	Nonalcoholic fatty liver disease || id:finn-b-NAFLD	Nonalcoholic fatty liver disease	Nonalcoholic fatty liver disease || ||	TRUE	igd	#N/A	#N/A	#N/A	#N/A	#N/A	#N/A	#N/A	0.00280123	2.07e-16	Waist circumference	TRUE	reported	ju9VE2	textfile	2	TRUE
51	rs13420048	A	C	A	C	-0.0139516	-0.0284	0.361297	0.429	FALSE	FALSE	FALSE	finn-b-NAFLD	2	50751414	0.0483	#N/A	0.5574	Nonalcoholic fatty liver disease || id:finn-b-NAFLD	Nonalcoholic fatty liver disease	Nonalcoholic fatty liver disease || ||	TRUE	igd	#N/A	#N/A	#N/A	#N/A	#N/A	#N/A	#N/A	0.00224737	5.37e-10	Waist circumference	TRUE	reported	ju9VE2	textfile	2	TRUE
52	rs13423444	A	G	A	G	0.0178103	0.0328	0.139213	0.09406	FALSE	FALSE	FALSE	finn-b-NAFLD	2	155125644	0.0819	#N/A	0.689	Nonalcoholic fatty liver disease || id:finn-b-NAFLD	Nonalcoholic fatty liver disease	Nonalcoholic fatty liver disease || ||	TRUE	igd	#N/A	#N/A	#N/A	#N/A	#N/A	#N/A	#N/A	0.00311058	1.03e-08	Waist circumference	TRUE	reported	ju9VE2	textfile	2	TRUE
53	rs13427822	G	A	G	A	-0.0159741	0.0507	0.272052	0.3043	FALSE	FALSE	FALSE	finn-b-NAFLD	2	213414265	0.0525	#N/A	0.3342	Nonalcoholic fatty liver disease || id:finn-b-NAFLD	Nonalcoholic fatty liver disease	Nonalcoholic fatty liver disease || ||	TRUE	igd	#N/A	#N/A	#N/A	#N/A	#N/A	#N/A	#N/A	0.002443	6.21e-11	Waist circumference	TRUE	reported	ju9VE2	textfile	2	TRUE
54	rs1383723	T	A	T	A	-0.017439	-0.1309	0.782487	0.778	FALSE	TRUE	FALSE	finn-b-NAFLD	4	67803507	0.0574	#N/A	0.0226001	Nonalcoholic fatty liver disease || id:finn-b-NAFLD	Nonalcoholic fatty liver disease	Nonalcoholic fatty liver disease || ||	TRUE	igd	#N/A	#N/A	#N/A	#N/A	#N/A	#N/A	#N/A	0.00261578	2.62e-11	Waist circumference	TRUE	reported	ju9VE2	textfile	2	TRUE
55	rs1411432	C	A	C	A	0.0164376	-0.0217	0.183895	0.1775	FALSE	FALSE	FALSE	finn-b-NAFLD	9	16728532	0.0626	#N/A	0.729201	Nonalcoholic fatty liver disease || id:finn-b-NAFLD	Nonalcoholic fatty liver disease	Nonalcoholic fatty liver disease || ||	TRUE	igd	#N/A	#N/A	#N/A	#N/A	#N/A	#N/A	#N/A	0.00278338	3.52e-09	Waist circumference	TRUE	reported	ju9VE2	textfile	2	TRUE
56	rs1412239	G	C	G	C	0.019727	-0.0073	0.324541	0.3761	FALSE	TRUE	FALSE	finn-b-NAFLD	9	28425515	0.0494	#N/A	0.8828	Nonalcoholic fatty liver disease || id:finn-b-NAFLD	Nonalcoholic fatty liver disease	Nonalcoholic fatty liver disease || ||	TRUE	igd	#N/A	#N/A	#N/A	#N/A	#N/A	#N/A	#N/A	0.00229433	8.13e-18	Waist circumference	TRUE	reported	ju9VE2	textfile	2	TRUE
57	rs1441264	A	G	A	G	0.0161052	0.029	0.591866	0.6706	FALSE	FALSE	FALSE	finn-b-NAFLD	13	79580919	0.051	#N/A	0.5696	Nonalcoholic fatty liver disease || id:finn-b-NAFLD	Nonalcoholic fatty liver disease	Nonalcoholic fatty liver disease || ||	TRUE	igd	#N/A	#N/A	#N/A	#N/A	#N/A	#N/A	#N/A	0.00223532	5.82e-13	Waist circumference	TRUE	reported	ju9VE2	textfile	2	TRUE
58	rs1454687	G	C	G	C	-0.0176908	-0.1244	0.515055	0.5554	FALSE	TRUE	TRUE	finn-b-NAFLD	3	94038085	0.0482	#N/A	0.00984102	Nonalcoholic fatty liver disease || id:finn-b-NAFLD	Nonalcoholic fatty liver disease	Nonalcoholic fatty liver disease || ||	TRUE	igd	#N/A	#N/A	#N/A	#N/A	#N/A	#N/A	#N/A	0.00215185	2.02e-16	Waist circumference	TRUE	reported	ju9VE2	textfile	2	FALSE
59	rs146311547	G	A	G	A	0.0177425	-0.0064	0.130669	0.0893	FALSE	FALSE	FALSE	finn-b-NAFLD	5	244493	0.0838	#N/A	0.9388	Nonalcoholic fatty liver disease || id:finn-b-NAFLD	Nonalcoholic fatty liver disease	Nonalcoholic fatty liver disease || ||	TRUE	igd	#N/A	#N/A	#N/A	#N/A	#N/A	#N/A	#N/A	0.0032254	3.78e-08	Waist circumference	TRUE	reported	ju9VE2	textfile	2	TRUE
60	rs1472872	G	A	G	A	-0.0219381	0.1554	0.0788095	0.07524	FALSE	FALSE	FALSE	finn-b-NAFLD	4	175243815	0.0908	#N/A	0.0871104	Nonalcoholic fatty liver disease || id:finn-b-NAFLD	Nonalcoholic fatty liver disease	Nonalcoholic fatty liver disease || ||	TRUE	igd	#N/A	#N/A	#N/A	#N/A	#N/A	#N/A	#N/A	0.003991	3.87e-08	Waist circumference	TRUE	reported	ju9VE2	textfile	2	TRUE
61	rs147786161	G	A	G	A	0.0118984	0.0662	0.436205	0.3912	FALSE	FALSE	FALSE	finn-b-NAFLD	12	122583781	0.0492	#N/A	0.1791	Nonalcoholic fatty liver disease || id:finn-b-NAFLD	Nonalcoholic fatty liver disease	Nonalcoholic fatty liver disease || ||	TRUE	igd	#N/A	#N/A	#N/A	#N/A	#N/A	#N/A	#N/A	0.00218105	4.89e-08	Waist circumference	TRUE	reported	ju9VE2	textfile	2	TRUE
62	rs1559900	T	C	T	C	0.0130192	-0.0806	0.285054	0.2542	FALSE	FALSE	FALSE	finn-b-NAFLD	8	14207321	0.055	#N/A	0.1429	Nonalcoholic fatty liver disease || id:finn-b-NAFLD	Nonalcoholic fatty liver disease	Nonalcoholic fatty liver disease || ||	TRUE	igd	#N/A	#N/A	#N/A	#N/A	#N/A	#N/A	#N/A	0.00238216	4.62e-08	Waist circumference	TRUE	reported	ju9VE2	textfile	2	TRUE
63	rs1566085	T	G	T	G	-0.0127734	0.0791	0.545436	0.5282	FALSE	FALSE	FALSE	finn-b-NAFLD	8	142624527	0.0478	#N/A	0.0980596	Nonalcoholic fatty liver disease || id:finn-b-NAFLD	Nonalcoholic fatty liver disease	Nonalcoholic fatty liver disease || ||	TRUE	igd	#N/A	#N/A	#N/A	#N/A	#N/A	#N/A	#N/A	0.00217593	4.35e-09	Waist circumference	TRUE	reported	ju9VE2	textfile	2	TRUE
64	rs1582931	A	G	A	G	-0.0146874	-0.0053	0.472057	0.5124	FALSE	FALSE	FALSE	finn-b-NAFLD	5	122657199	0.0479	#N/A	0.9123	Nonalcoholic fatty liver disease || id:finn-b-NAFLD	Nonalcoholic fatty liver disease	Nonalcoholic fatty liver disease || ||	TRUE	igd	#N/A	#N/A	#N/A	#N/A	#N/A	#N/A	#N/A	0.00217176	1.35e-11	Waist circumference	TRUE	reported	ju9VE2	textfile	2	TRUE
65	rs1609303	A	T	A	T	0.0171103	0.0574	0.631218	0.6427	FALSE	TRUE	FALSE	finn-b-NAFLD	2	181567556	0.0499	#N/A	0.2498	Nonalcoholic fatty liver disease || id:finn-b-NAFLD	Nonalcoholic fatty liver disease	Nonalcoholic fatty liver disease || ||	TRUE	igd	#N/A	#N/A	#N/A	#N/A	#N/A	#N/A	#N/A	0.002238	2.09e-14	Waist circumference	TRUE	reported	ju9VE2	textfile	2	TRUE
66	rs1652376	T	G	T	G	-0.0194886	0.0299	0.464221	0.4814	FALSE	FALSE	FALSE	finn-b-NAFLD	18	21109466	0.0479	#N/A	0.5329	Nonalcoholic fatty liver disease || id:finn-b-NAFLD	Nonalcoholic fatty liver disease	Nonalcoholic fatty liver disease || ||	TRUE	igd	#N/A	#N/A	#N/A	#N/A	#N/A	#N/A	#N/A	0.00215595	1.58e-19	Waist circumference	TRUE	reported	ju9VE2	textfile	2	TRUE
67	rs1724557	A	C	A	C	-0.0140573	-0.0011	0.58831	0.5231	FALSE	FALSE	FALSE	finn-b-NAFLD	4	137094048	0.0479	#N/A	0.9817	Nonalcoholic fatty liver disease || id:finn-b-NAFLD	Nonalcoholic fatty liver disease	Nonalcoholic fatty liver disease || ||	TRUE	igd	#N/A	#N/A	#N/A	#N/A	#N/A	#N/A	#N/A	0.00219535	1.52e-10	Waist circumference	TRUE	reported	ju9VE2	textfile	2	TRUE
68	rs1752169	A	C	A	C	0.0149735	-0.0054	0.249001	0.3768	FALSE	FALSE	FALSE	finn-b-NAFLD	9	126586563	0.0494	#N/A	0.9124	Nonalcoholic fatty liver disease || id:finn-b-NAFLD	Nonalcoholic fatty liver disease	Nonalcoholic fatty liver disease || ||	TRUE	igd	#N/A	#N/A	#N/A	#N/A	#N/A	#N/A	#N/A	0.0024928	1.9e-09	Waist circumference	TRUE	reported	ju9VE2	textfile	2	TRUE
69	rs17639996	A	G	A	G	-0.0165482	-0.0851	0.151381	0.1771	FALSE	FALSE	FALSE	finn-b-NAFLD	3	61269668	0.063	#N/A	0.1771	Nonalcoholic fatty liver disease || id:finn-b-NAFLD	Nonalcoholic fatty liver disease	Nonalcoholic fatty liver disease || ||	TRUE	igd	#N/A	#N/A	#N/A	#N/A	#N/A	#N/A	#N/A	0.00301196	3.93e-08	Waist circumference	TRUE	reported	ju9VE2	textfile	2	TRUE
70	rs17708311	C	G	C	G	-0.0254059	-0.0878	0.0670227	0.06703	FALSE	TRUE	FALSE	finn-b-NAFLD	6	94678897	0.0963	#N/A	0.3623	Nonalcoholic fatty liver disease || id:finn-b-NAFLD	Nonalcoholic fatty liver disease	Nonalcoholic fatty liver disease || ||	TRUE	igd	#N/A	#N/A	#N/A	#N/A	#N/A	#N/A	#N/A	0.00429829	3.41e-09	Waist circumference	TRUE	reported	ju9VE2	textfile	2	TRUE
71	rs17716502	T	C	T	C	-0.0178862	-0.0001	0.207243	0.1939	FALSE	FALSE	FALSE	finn-b-NAFLD	8	116659731	0.0609	#N/A	0.9989	Nonalcoholic fatty liver disease || id:finn-b-NAFLD	Nonalcoholic fatty liver disease	Nonalcoholic fatty liver disease || ||	TRUE	igd	#N/A	#N/A	#N/A	#N/A	#N/A	#N/A	#N/A	0.00267351	2.23e-11	Waist circumference	TRUE	reported	ju9VE2	textfile	2	TRUE
72	rs1776209	G	A	G	A	-0.0136478	-0.0918	0.292775	0.3851	FALSE	FALSE	FALSE	finn-b-NAFLD	10	93810872	0.0493	#N/A	0.0624799	Nonalcoholic fatty liver disease || id:finn-b-NAFLD	Nonalcoholic fatty liver disease	Nonalcoholic fatty liver disease || ||	TRUE	igd	#N/A	#N/A	#N/A	#N/A	#N/A	#N/A	#N/A	0.00237591	9.24e-09	Waist circumference	TRUE	reported	ju9VE2	textfile	2	TRUE
73	rs1782508	G	C	G	C	-0.0150543	-0.0686	0.656325	0.6685	FALSE	TRUE	FALSE	finn-b-NAFLD	11	30243795	0.0508	#N/A	0.1769	Nonalcoholic fatty liver disease || id:finn-b-NAFLD	Nonalcoholic fatty liver disease	Nonalcoholic fatty liver disease || ||	TRUE	igd	#N/A	#N/A	#N/A	#N/A	#N/A	#N/A	#N/A	0.00226128	2.79e-11	Waist circumference	TRUE	reported	ju9VE2	textfile	2	TRUE
74	rs1834144	A	C	A	C	-0.0146621	-0.0668	0.374186	0.4462	FALSE	FALSE	FALSE	finn-b-NAFLD	18	40744790	0.0482	#N/A	0.1657	Nonalcoholic fatty liver disease || id:finn-b-NAFLD	Nonalcoholic fatty liver disease	Nonalcoholic fatty liver disease || ||	TRUE	igd	#N/A	#N/A	#N/A	#N/A	#N/A	#N/A	#N/A	0.00222893	4.77e-11	Waist circumference	TRUE	reported	ju9VE2	textfile	2	TRUE
75	rs1914888	G	A	G	A	-0.0121519	-0.006	0.489752	0.5097	FALSE	FALSE	FALSE	finn-b-NAFLD	17	21267541	0.0479	#N/A	0.901	Nonalcoholic fatty liver disease || id:finn-b-NAFLD	Nonalcoholic fatty liver disease	Nonalcoholic fatty liver disease || ||	TRUE	igd	#N/A	#N/A	#N/A	#N/A	#N/A	#N/A	#N/A	0.00215881	1.81e-08	Waist circumference	TRUE	reported	ju9VE2	textfile	2	TRUE
76	rs1928496	T	C	T	C	0.0144603	-0.067	0.742388	0.6829	FALSE	FALSE	FALSE	finn-b-NAFLD	13	31012904	0.0519	#N/A	0.1966	Nonalcoholic fatty liver disease || id:finn-b-NAFLD	Nonalcoholic fatty liver disease	Nonalcoholic fatty liver disease || ||	TRUE	igd	#N/A	#N/A	#N/A	#N/A	#N/A	#N/A	#N/A	0.00245655	3.95e-09	Waist circumference	TRUE	reported	ju9VE2	textfile	2	TRUE
77	rs1942826	A	G	A	G	0.0206123	0.0451	0.124293	0.2277	FALSE	FALSE	FALSE	finn-b-NAFLD	18	63345799	0.0574	#N/A	0.4323	Nonalcoholic fatty liver disease || id:finn-b-NAFLD	Nonalcoholic fatty liver disease	Nonalcoholic fatty liver disease || ||	TRUE	igd	#N/A	#N/A	#N/A	#N/A	#N/A	#N/A	#N/A	0.00326444	2.72e-10	Waist circumference	TRUE	reported	ju9VE2	textfile	2	TRUE
78	rs2032912	T	G	T	G	-0.0173898	-0.0545	0.409137	0.428	FALSE	FALSE	FALSE	finn-b-NAFLD	16	69581354	0.0484	#N/A	0.2603	Nonalcoholic fatty liver disease || id:finn-b-NAFLD	Nonalcoholic fatty liver disease	Nonalcoholic fatty liver disease || ||	TRUE	igd	TRUE	rs2032912	rs35967356	T	G	T	C	0.00219463	2.31e-15	Waist circumference	TRUE	reported	ju9VE2	textfile	2	TRUE
79	rs208015	C	T	C	T	-0.0315168	-0.0228	0.932268	0.8923	FALSE	FALSE	FALSE	finn-b-NAFLD	17	46252346	0.0761	#N/A	0.764499	Nonalcoholic fatty liver disease || id:finn-b-NAFLD	Nonalcoholic fatty liver disease	Nonalcoholic fatty liver disease || ||	TRUE	igd	#N/A	#N/A	#N/A	#N/A	#N/A	#N/A	#N/A	0.004285	1.91e-13	Waist circumference	TRUE	reported	ju9VE2	textfile	2	TRUE
80	rs2121058	C	T	C	T	-0.0178087	0.0099	0.228644	0.2361	FALSE	FALSE	FALSE	finn-b-NAFLD	13	58627256	0.0563	#N/A	0.8597	Nonalcoholic fatty liver disease || id:finn-b-NAFLD	Nonalcoholic fatty liver disease	Nonalcoholic fatty liver disease || ||	TRUE	igd	#N/A	#N/A	#N/A	#N/A	#N/A	#N/A	#N/A	0.00256163	3.61e-12	Waist circumference	TRUE	reported	ju9VE2	textfile	2	TRUE
81	rs2126165	G	A	G	A	-0.0143063	0.009	0.511188	0.5407	FALSE	FALSE	FALSE	finn-b-NAFLD	5	153167595	0.048	#N/A	0.8506	Nonalcoholic fatty liver disease || id:finn-b-NAFLD	Nonalcoholic fatty liver disease	Nonalcoholic fatty liver disease || ||	TRUE	igd	#N/A	#N/A	#N/A	#N/A	#N/A	#N/A	#N/A	0.00215364	3.08e-11	Waist circumference	TRUE	reported	ju9VE2	textfile	2	TRUE
82	rs2172131	C	T	C	T	-0.0139997	-0.0112	0.580636	0.5139	FALSE	FALSE	FALSE	finn-b-NAFLD	10	133978962	0.0478	#N/A	0.815	Nonalcoholic fatty liver disease || id:finn-b-NAFLD	Nonalcoholic fatty liver disease	Nonalcoholic fatty liver disease || ||	TRUE	igd	#N/A	#N/A	#N/A	#N/A	#N/A	#N/A	#N/A	0.00218023	1.35e-10	Waist circumference	TRUE	reported	ju9VE2	textfile	2	TRUE
83	rs2183947	A	G	A	G	-0.0240585	-0.0403	0.224329	0.2333	FALSE	FALSE	FALSE	finn-b-NAFLD	6	26159356	0.057	#N/A	0.4798	Nonalcoholic fatty liver disease || id:finn-b-NAFLD	Nonalcoholic fatty liver disease	Nonalcoholic fatty liver disease || ||	TRUE	igd	#N/A	#N/A	#N/A	#N/A	#N/A	#N/A	#N/A	0.00257399	9.09e-21	Waist circumference	TRUE	reported	ju9VE2	textfile	2	TRUE
84	rs2192527	G	A	G	A	0.0149708	0.1369	0.464952	0.3763	FALSE	FALSE	FALSE	finn-b-NAFLD	4	18329824	0.0494	#N/A	0.00556404	Nonalcoholic fatty liver disease || id:finn-b-NAFLD	Nonalcoholic fatty liver disease	Nonalcoholic fatty liver disease || ||	TRUE	igd	#N/A	#N/A	#N/A	#N/A	#N/A	#N/A	#N/A	0.00216127	4.31e-12	Waist circumference	TRUE	reported	ju9VE2	textfile	2	TRUE
85	rs2242259	C	T	C	T	-0.0142362	0.0156	0.555968	0.4866	FALSE	FALSE	FALSE	finn-b-NAFLD	12	122265106	0.048	#N/A	0.744699	Nonalcoholic fatty liver disease || id:finn-b-NAFLD	Nonalcoholic fatty liver disease	Nonalcoholic fatty liver disease || ||	TRUE	igd	#N/A	#N/A	#N/A	#N/A	#N/A	#N/A	#N/A	0.00216726	5.08e-11	Waist circumference	TRUE	reported	ju9VE2	textfile	2	TRUE
86	rs2253310	G	C	G	C	0.0191052	0.0131	0.628085	0.5791	FALSE	TRUE	TRUE	finn-b-NAFLD	6	108888593	0.0485	#N/A	0.7867	Nonalcoholic fatty liver disease || id:finn-b-NAFLD	Nonalcoholic fatty liver disease	Nonalcoholic fatty liver disease || ||	TRUE	igd	#N/A	#N/A	#N/A	#N/A	#N/A	#N/A	#N/A	0.00222456	8.86e-18	Waist circumference	TRUE	reported	ju9VE2	textfile	2	FALSE
87	rs2306593	T	C	T	C	-0.0169304	-0.0519	0.488522	0.5031	FALSE	FALSE	FALSE	finn-b-NAFLD	17	34866546	0.0479	#N/A	0.279	Nonalcoholic fatty liver disease || id:finn-b-NAFLD	Nonalcoholic fatty liver disease	Nonalcoholic fatty liver disease || ||	TRUE	igd	#N/A	#N/A	#N/A	#N/A	#N/A	#N/A	#N/A	0.00215553	4.03e-15	Waist circumference	TRUE	reported	ju9VE2	textfile	2	TRUE
88	rs2307111	C	T	C	T	-0.0245649	-0.0121	0.393183	0.4266	FALSE	FALSE	FALSE	finn-b-NAFLD	5	75003678	0.0484	#N/A	0.8026	Nonalcoholic fatty liver disease || id:finn-b-NAFLD	Nonalcoholic fatty liver disease	Nonalcoholic fatty liver disease || ||	TRUE	igd	#N/A	#N/A	#N/A	#N/A	#N/A	#N/A	#N/A	0.00220411	7.66e-29	Waist circumference	TRUE	reported	ju9VE2	textfile	2	TRUE
89	rs2370982	T	C	T	C	0.0205483	0.0727	0.215336	0.237	FALSE	FALSE	FALSE	finn-b-NAFLD	14	79890677	0.0562	#N/A	0.1959	Nonalcoholic fatty liver disease || id:finn-b-NAFLD	Nonalcoholic fatty liver disease	Nonalcoholic fatty liver disease || ||	TRUE	igd	#N/A	#N/A	#N/A	#N/A	#N/A	#N/A	#N/A	0.0026361	6.46e-15	Waist circumference	TRUE	reported	ju9VE2	textfile	2	TRUE
90	rs2404324	G	A	G	A	-0.0193061	-0.0569	0.154867	0.2184	FALSE	FALSE	FALSE	finn-b-NAFLD	7	99023461	0.0578	#N/A	0.325	Nonalcoholic fatty liver disease || id:finn-b-NAFLD	Nonalcoholic fatty liver disease	Nonalcoholic fatty liver disease || ||	TRUE	igd	#N/A	#N/A	#N/A	#N/A	#N/A	#N/A	#N/A	0.00297384	8.48e-11	Waist circumference	TRUE	reported	ju9VE2	textfile	2	TRUE
91	rs2417998	G	C	G	C	-0.0158889	0.0006	0.705619	0.6859	FALSE	TRUE	FALSE	finn-b-NAFLD	9	111958746	0.0517	#N/A	0.99	Nonalcoholic fatty liver disease || id:finn-b-NAFLD	Nonalcoholic fatty liver disease	Nonalcoholic fatty liver disease || ||	TRUE	igd	#N/A	#N/A	#N/A	#N/A	#N/A	#N/A	#N/A	0.00236952	2.01e-11	Waist circumference	TRUE	reported	ju9VE2	textfile	2	TRUE
92	rs2455821	A	C	A	C	0.0152548	0.1169	0.271103	0.2454	FALSE	FALSE	FALSE	finn-b-NAFLD	3	15681940	0.0555	#N/A	0.0352298	Nonalcoholic fatty liver disease || id:finn-b-NAFLD	Nonalcoholic fatty liver disease	Nonalcoholic fatty liver disease || ||	TRUE	igd	#N/A	#N/A	#N/A	#N/A	#N/A	#N/A	#N/A	0.00242133	2.98e-10	Waist circumference	TRUE	reported	ju9VE2	textfile	2	TRUE
93	rs245775	G	A	G	A	0.0161351	0.1194	0.728826	0.6753	FALSE	FALSE	FALSE	finn-b-NAFLD	5	170532105	0.0512	#N/A	0.0196499	Nonalcoholic fatty liver disease || id:finn-b-NAFLD	Nonalcoholic fatty liver disease	Nonalcoholic fatty liver disease || ||	TRUE	igd	#N/A	#N/A	#N/A	#N/A	#N/A	#N/A	#N/A	0.0024218	2.7e-11	Waist circumference	TRUE	reported	ju9VE2	textfile	2	TRUE
94	rs2470167	A	G	A	G	0.0148673	0.0643	0.203844	0.09905	FALSE	FALSE	FALSE	finn-b-NAFLD	15	51726258	0.08	#N/A	0.4214	Nonalcoholic fatty liver disease || id:finn-b-NAFLD	Nonalcoholic fatty liver disease	Nonalcoholic fatty liver disease || ||	TRUE	igd	#N/A	#N/A	#N/A	#N/A	#N/A	#N/A	#N/A	0.00267827	2.84e-08	Waist circumference	TRUE	reported	ju9VE2	textfile	2	TRUE
95	rs2482704	T	G	T	G	-0.0129521	-0.1337	0.423422	0.3776	FALSE	FALSE	FALSE	finn-b-NAFLD	9	94182363	0.0495	#N/A	0.00696899	Nonalcoholic fatty liver disease || id:finn-b-NAFLD	Nonalcoholic fatty liver disease	Nonalcoholic fatty liver disease || ||	TRUE	igd	#N/A	#N/A	#N/A	#N/A	#N/A	#N/A	#N/A	0.00217695	2.69e-09	Waist circumference	TRUE	reported	ju9VE2	textfile	2	TRUE
96	rs254024	T	G	T	G	0.0140302	0.0284	0.437492	0.3895	FALSE	FALSE	FALSE	finn-b-NAFLD	5	103944020	0.0492	#N/A	0.563101	Nonalcoholic fatty liver disease || id:finn-b-NAFLD	Nonalcoholic fatty liver disease	Nonalcoholic fatty liver disease || ||	TRUE	igd	#N/A	#N/A	#N/A	#N/A	#N/A	#N/A	#N/A	0.00216628	9.39e-11	Waist circumference	TRUE	reported	ju9VE2	textfile	2	TRUE
97	rs2678204	G	T	G	T	0.0194317	0.0271	0.341813	0.2962	FALSE	FALSE	FALSE	finn-b-NAFLD	1	201800511	0.0525	#N/A	0.6058	Nonalcoholic fatty liver disease || id:finn-b-NAFLD	Nonalcoholic fatty liver disease	Nonalcoholic fatty liver disease || ||	TRUE	igd	#N/A	#N/A	#N/A	#N/A	#N/A	#N/A	#N/A	0.00227049	1.15e-17	Waist circumference	TRUE	reported	ju9VE2	textfile	2	TRUE
98	rs2725371	G	A	G	A	-0.017926	0.0188	0.696308	0.7386	FALSE	FALSE	FALSE	finn-b-NAFLD	8	30854033	0.0546	#N/A	0.730601	Nonalcoholic fatty liver disease || id:finn-b-NAFLD	Nonalcoholic fatty liver disease	Nonalcoholic fatty liver disease || ||	TRUE	igd	#N/A	#N/A	#N/A	#N/A	#N/A	#N/A	#N/A	0.00234606	2.16e-14	Waist circumference	TRUE	reported	ju9VE2	textfile	2	TRUE
99	rs2814943	A	G	A	G	0.0343785	-0.088	0.139971	0.2027	FALSE	FALSE	FALSE	finn-b-NAFLD	6	34552736	0.0601	#N/A	0.1432	Nonalcoholic fatty liver disease || id:finn-b-NAFLD	Nonalcoholic fatty liver disease	Nonalcoholic fatty liver disease || ||	TRUE	igd	#N/A	#N/A	#N/A	#N/A	#N/A	#N/A	#N/A	0.00309386	1.11e-28	Waist circumference	TRUE	reported	ju9VE2	textfile	2	TRUE
100	rs28366156	C	T	C	T	-0.0212419	-0.0273	0.131356	0.07094	FALSE	FALSE	FALSE	finn-b-NAFLD	6	31671498	0.0939	#N/A	0.771699	Nonalcoholic fatty liver disease || id:finn-b-NAFLD	Nonalcoholic fatty liver disease	Nonalcoholic fatty liver disease || ||	TRUE	igd	#N/A	#N/A	#N/A	#N/A	#N/A	#N/A	#N/A	0.0031838	2.53e-11	Waist circumference	TRUE	reported	ju9VE2	textfile	2	TRUE
101	rs2861692	C	T	C	T	-0.0177333	-0.0322	0.27571	0.2886	FALSE	FALSE	FALSE	finn-b-NAFLD	2	67838719	0.0527	#N/A	0.542099	Nonalcoholic fatty liver disease || id:finn-b-NAFLD	Nonalcoholic fatty liver disease	Nonalcoholic fatty liver disease || ||	TRUE	igd	#N/A	#N/A	#N/A	#N/A	#N/A	#N/A	#N/A	0.00240824	1.79e-13	Waist circumference	TRUE	reported	ju9VE2	textfile	2	TRUE
102	rs286818	A	T	A	T	-0.0182155	-0.0199	0.170248	0.2095	FALSE	TRUE	FALSE	finn-b-NAFLD	5	107433446	0.0589	#N/A	0.7356	Nonalcoholic fatty liver disease || id:finn-b-NAFLD	Nonalcoholic fatty liver disease	Nonalcoholic fatty liver disease || ||	TRUE	igd	#N/A	#N/A	#N/A	#N/A	#N/A	#N/A	#N/A	0.00286927	2.18e-10	Waist circumference	TRUE	reported	ju9VE2	textfile	2	TRUE
103	rs2903738	T	A	T	A	-0.0154642	-0.0092	0.220475	0.2391	FALSE	TRUE	FALSE	finn-b-NAFLD	19	32946043	0.0562	#N/A	0.8696	Nonalcoholic fatty liver disease || id:finn-b-NAFLD	Nonalcoholic fatty liver disease	Nonalcoholic fatty liver disease || ||	TRUE	igd	#N/A	#N/A	#N/A	#N/A	#N/A	#N/A	#N/A	0.00259614	2.58e-09	Waist circumference	TRUE	reported	ju9VE2	textfile	2	TRUE
104	rs34045288	T	C	T	C	0.0224668	0.0304	0.335903	0.3767	FALSE	FALSE	FALSE	finn-b-NAFLD	6	40369081	0.0494	#N/A	0.5382	Nonalcoholic fatty liver disease || id:finn-b-NAFLD	Nonalcoholic fatty liver disease	Nonalcoholic fatty liver disease || ||	TRUE	igd	#N/A	#N/A	#N/A	#N/A	#N/A	#N/A	#N/A	0.00227876	6.3e-23	Waist circumference	TRUE	reported	ju9VE2	textfile	2	TRUE
105	rs34483452	A	C	A	C	0.0251173	-0.0323	0.135156	0.1211	FALSE	FALSE	FALSE	finn-b-NAFLD	5	87986314	0.0732	#N/A	0.6594	Nonalcoholic fatty liver disease || id:finn-b-NAFLD	Nonalcoholic fatty liver disease	Nonalcoholic fatty liver disease || ||	TRUE	igd	#N/A	#N/A	#N/A	#N/A	#N/A	#N/A	#N/A	0.0031711	2.37e-15	Waist circumference	TRUE	reported	ju9VE2	textfile	2	TRUE
106	rs350832	A	G	A	G	0.016099	0.0205	0.770714	0.8086	FALSE	FALSE	FALSE	finn-b-NAFLD	19	4069426	0.0611	#N/A	0.7366	Nonalcoholic fatty liver disease || id:finn-b-NAFLD	Nonalcoholic fatty liver disease	Nonalcoholic fatty liver disease || ||	TRUE	igd	#N/A	#N/A	#N/A	#N/A	#N/A	#N/A	#N/A	0.00257337	3.95e-10	Waist circumference	TRUE	reported	ju9VE2	textfile	2	TRUE
107	rs35343344	A	C	A	C	-0.0168531	-0.0713	0.267358	0.2379	FALSE	FALSE	FALSE	finn-b-NAFLD	19	18471610	0.0567	#N/A	0.2086	Nonalcoholic fatty liver disease || id:finn-b-NAFLD	Nonalcoholic fatty liver disease	Nonalcoholic fatty liver disease || ||	TRUE	igd	#N/A	#N/A	#N/A	#N/A	#N/A	#N/A	#N/A	0.00247495	9.81e-12	Waist circumference	TRUE	reported	ju9VE2	textfile	2	TRUE
108	rs35972789	A	C	A	C	-0.0312102	0.0784	0.0377655	0.02862	FALSE	FALSE	FALSE	finn-b-NAFLD	10	75519691	0.1472	#N/A	0.5945	Nonalcoholic fatty liver disease || id:finn-b-NAFLD	Nonalcoholic fatty liver disease	Nonalcoholic fatty liver disease || ||	TRUE	igd	#N/A	#N/A	#N/A	#N/A	#N/A	#N/A	#N/A	0.00563553	3.06e-08	Waist circumference	TRUE	reported	ju9VE2	textfile	2	TRUE
109	rs3803286	G	A	G	A	-0.0166452	-0.0048	0.666379	0.6625	FALSE	FALSE	FALSE	finn-b-NAFLD	14	103246470	0.0506	#N/A	0.9241	Nonalcoholic fatty liver disease || id:finn-b-NAFLD	Nonalcoholic fatty liver disease	Nonalcoholic fatty liver disease || ||	TRUE	igd	#N/A	#N/A	#N/A	#N/A	#N/A	#N/A	#N/A	0.00227816	2.75e-13	Waist circumference	TRUE	reported	ju9VE2	textfile	2	TRUE
110	rs3814883	T	C	T	C	0.027979	-0.0177	0.483348	0.4119	FALSE	FALSE	FALSE	finn-b-NAFLD	16	29994922	0.0485	#N/A	0.714399	Nonalcoholic fatty liver disease || id:finn-b-NAFLD	Nonalcoholic fatty liver disease	Nonalcoholic fatty liver disease || ||	TRUE	igd	#N/A	#N/A	#N/A	#N/A	#N/A	#N/A	#N/A	0.00215875	2.09e-38	Waist circumference	TRUE	reported	ju9VE2	textfile	2	TRUE
111	rs3826408	T	C	T	C	0.0124231	-0.0036	0.457214	0.5112	FALSE	FALSE	FALSE	finn-b-NAFLD	17	7101292	0.0479	#N/A	0.9393	Nonalcoholic fatty liver disease || id:finn-b-NAFLD	Nonalcoholic fatty liver disease	Nonalcoholic fatty liver disease || ||	TRUE	igd	#N/A	#N/A	#N/A	#N/A	#N/A	#N/A	#N/A	0.0021584	8.64e-09	Waist circumference	TRUE	reported	ju9VE2	textfile	2	TRUE
112	rs41279738	G	T	G	T	0.05059	-0.0148	0.0259224	0.05677	FALSE	FALSE	FALSE	finn-b-NAFLD	1	110082551	0.1031	#N/A	0.8862	Nonalcoholic fatty liver disease || id:finn-b-NAFLD	Nonalcoholic fatty liver disease	Nonalcoholic fatty liver disease || ||	TRUE	igd	#N/A	#N/A	#N/A	#N/A	#N/A	#N/A	#N/A	0.00679322	9.56e-14	Waist circumference	TRUE	reported	ju9VE2	textfile	2	TRUE
113	rs4322261	A	G	A	G	-0.0183121	0.0434	0.835845	0.7688	FALSE	FALSE	FALSE	finn-b-NAFLD	1	98405856	0.0566	#N/A	0.4431	Nonalcoholic fatty liver disease || id:finn-b-NAFLD	Nonalcoholic fatty liver disease	Nonalcoholic fatty liver disease || ||	TRUE	igd	#N/A	#N/A	#N/A	#N/A	#N/A	#N/A	#N/A	0.00290548	2.93e-10	Waist circumference	TRUE	reported	ju9VE2	textfile	2	TRUE
114	rs4467770	A	G	A	G	0.0140217	-0.0642	0.730668	0.7104	FALSE	FALSE	FALSE	finn-b-NAFLD	6	12086826	0.053	#N/A	0.2261	Nonalcoholic fatty liver disease || id:finn-b-NAFLD	Nonalcoholic fatty liver disease	Nonalcoholic fatty liver disease || ||	TRUE	igd	#N/A	#N/A	#N/A	#N/A	#N/A	#N/A	#N/A	0.00243256	8.21e-09	Waist circumference	TRUE	reported	ju9VE2	textfile	2	TRUE
115	rs4482463	A	C	A	C	-0.0288006	-0.2324	0.924181	0.9401	FALSE	FALSE	FALSE	finn-b-NAFLD	2	205375909	0.1013	#N/A	0.0217701	Nonalcoholic fatty liver disease || id:finn-b-NAFLD	Nonalcoholic fatty liver disease	Nonalcoholic fatty liver disease || ||	TRUE	igd	#N/A	#N/A	#N/A	#N/A	#N/A	#N/A	#N/A	0.00406987	1.48e-12	Waist circumference	TRUE	reported	ju9VE2	textfile	2	TRUE
116	rs4722398	T	C	T	C	0.0184664	0.0444	0.135663	0.07005	FALSE	FALSE	FALSE	finn-b-NAFLD	7	3125220	0.094	#N/A	0.636499	Nonalcoholic fatty liver disease || id:finn-b-NAFLD	Nonalcoholic fatty liver disease	Nonalcoholic fatty liver disease || ||	TRUE	igd	#N/A	#N/A	#N/A	#N/A	#N/A	#N/A	#N/A	0.00313148	3.7e-09	Waist circumference	TRUE	reported	ju9VE2	textfile	2	TRUE
117	rs4741546	T	C	T	C	-0.0154638	-0.0285	0.39735	0.4659	FALSE	FALSE	FALSE	finn-b-NAFLD	9	15846112	0.048	#N/A	0.5533	Nonalcoholic fatty liver disease || id:finn-b-NAFLD	Nonalcoholic fatty liver disease	Nonalcoholic fatty liver disease || ||	TRUE	igd	#N/A	#N/A	#N/A	#N/A	#N/A	#N/A	#N/A	0.0022059	2.38e-12	Waist circumference	TRUE	reported	ju9VE2	textfile	2	TRUE
118	rs4856407	T	C	T	C	0.0154749	-0.005	0.364174	0.2893	FALSE	FALSE	FALSE	finn-b-NAFLD	3	82691680	0.0527	#N/A	0.9245	Nonalcoholic fatty liver disease || id:finn-b-NAFLD	Nonalcoholic fatty liver disease	Nonalcoholic fatty liver disease || ||	TRUE	igd	#N/A	#N/A	#N/A	#N/A	#N/A	#N/A	#N/A	0.00223286	4.2e-12	Waist circumference	TRUE	reported	ju9VE2	textfile	2	TRUE
119	rs4856721	A	G	A	G	0.0126375	0.0439	0.538649	0.4785	FALSE	FALSE	FALSE	finn-b-NAFLD	3	161447374	0.0479	#N/A	0.3594	Nonalcoholic fatty liver disease || id:finn-b-NAFLD	Nonalcoholic fatty liver disease	Nonalcoholic fatty liver disease || ||	TRUE	igd	#N/A	#N/A	#N/A	#N/A	#N/A	#N/A	#N/A	0.00215646	4.62e-09	Waist circumference	TRUE	reported	ju9VE2	textfile	2	TRUE
120	rs4981693	A	G	A	G	0.0176133	0.1169	0.772734	0.6703	FALSE	FALSE	FALSE	finn-b-NAFLD	14	29680331	0.0509	#N/A	0.02174	Nonalcoholic fatty liver disease || id:finn-b-NAFLD	Nonalcoholic fatty liver disease	Nonalcoholic fatty liver disease || ||	TRUE	igd	#N/A	#N/A	#N/A	#N/A	#N/A	#N/A	#N/A	0.00256987	7.2e-12	Waist circumference	TRUE	reported	ju9VE2	textfile	2	TRUE
121	rs525101	C	T	C	T	0.0129213	-0.0027	0.371963	0.4443	FALSE	FALSE	FALSE	finn-b-NAFLD	13	111969728	0.0482	#N/A	0.9558	Nonalcoholic fatty liver disease || id:finn-b-NAFLD	Nonalcoholic fatty liver disease	Nonalcoholic fatty liver disease || ||	TRUE	igd	#N/A	#N/A	#N/A	#N/A	#N/A	#N/A	#N/A	0.00222956	6.82e-09	Waist circumference	TRUE	reported	ju9VE2	textfile	2	TRUE
122	rs539515	C	A	C	A	0.0353614	0.0166	0.207529	0.1778	FALSE	FALSE	FALSE	finn-b-NAFLD	1	177889025	0.0625	#N/A	0.7904	Nonalcoholic fatty liver disease || id:finn-b-NAFLD	Nonalcoholic fatty liver disease	Nonalcoholic fatty liver disease || ||	TRUE	igd	#N/A	#N/A	#N/A	#N/A	#N/A	#N/A	#N/A	0.00265034	1.35e-40	Waist circumference	TRUE	reported	ju9VE2	textfile	2	TRUE
123	rs541577	G	A	G	A	-0.0121652	-0.1159	0.621259	0.6759	FALSE	FALSE	FALSE	finn-b-NAFLD	7	32382895	0.0514	#N/A	0.0240099	Nonalcoholic fatty liver disease || id:finn-b-NAFLD	Nonalcoholic fatty liver disease	Nonalcoholic fatty liver disease || ||	TRUE	igd	#N/A	#N/A	#N/A	#N/A	#N/A	#N/A	#N/A	0.00222647	4.66e-08	Waist circumference	TRUE	reported	ju9VE2	textfile	2	TRUE
124	rs55726687	A	G	A	G	0.0179296	0.0867	0.211138	0.2143	FALSE	FALSE	FALSE	finn-b-NAFLD	12	991306	0.0584	#N/A	0.1374	Nonalcoholic fatty liver disease || id:finn-b-NAFLD	Nonalcoholic fatty liver disease	Nonalcoholic fatty liver disease || ||	TRUE	igd	#N/A	#N/A	#N/A	#N/A	#N/A	#N/A	#N/A	0.00263446	1.01e-11	Waist circumference	TRUE	reported	ju9VE2	textfile	2	TRUE
125	rs56203712	G	A	G	A	-0.0165005	-0.0151	0.238079	0.2525	FALSE	FALSE	FALSE	finn-b-NAFLD	4	25342606	0.0553	#N/A	0.784599	Nonalcoholic fatty liver disease || id:finn-b-NAFLD	Nonalcoholic fatty liver disease	Nonalcoholic fatty liver disease || ||	TRUE	igd	#N/A	#N/A	#N/A	#N/A	#N/A	#N/A	#N/A	0.0025869	1.79e-10	Waist circumference	TRUE	reported	ju9VE2	textfile	2	TRUE
126	rs56362718	C	T	C	T	0.0151009	0.0029	0.310066	0.2621	FALSE	FALSE	FALSE	finn-b-NAFLD	12	133399553	0.0545	#N/A	0.9582	Nonalcoholic fatty liver disease || id:finn-b-NAFLD	Nonalcoholic fatty liver disease	Nonalcoholic fatty liver disease || ||	TRUE	igd	#N/A	#N/A	#N/A	#N/A	#N/A	#N/A	#N/A	0.00232596	8.46e-11	Waist circumference	TRUE	reported	ju9VE2	textfile	2	TRUE
127	rs56803094	G	A	G	A	-0.0157525	-0.0305	0.227111	0.2784	FALSE	FALSE	FALSE	finn-b-NAFLD	15	99222509	0.0538	#N/A	0.5699	Nonalcoholic fatty liver disease || id:finn-b-NAFLD	Nonalcoholic fatty liver disease	Nonalcoholic fatty liver disease || ||	TRUE	igd	#N/A	#N/A	#N/A	#N/A	#N/A	#N/A	#N/A	0.0025732	9.26e-10	Waist circumference	TRUE	reported	ju9VE2	textfile	2	TRUE
128	rs57636386	C	T	C	T	-0.0327533	0.1827	0.0834151	0.05017	FALSE	FALSE	FALSE	finn-b-NAFLD	18	58048295	0.1097	#N/A	0.0959489	Nonalcoholic fatty liver disease || id:finn-b-NAFLD	Nonalcoholic fatty liver disease	Nonalcoholic fatty liver disease || ||	TRUE	igd	#N/A	#N/A	#N/A	#N/A	#N/A	#N/A	#N/A	0.00389755	4.35e-17	Waist circumference	TRUE	reported	ju9VE2	textfile	2	TRUE
129	rs58568715	G	A	G	A	0.0172649	0.0666	0.164345	0.1386	FALSE	FALSE	FALSE	finn-b-NAFLD	11	65662985	0.0696	#N/A	0.3388	Nonalcoholic fatty liver disease || id:finn-b-NAFLD	Nonalcoholic fatty liver disease	Nonalcoholic fatty liver disease || ||	TRUE	igd	#N/A	#N/A	#N/A	#N/A	#N/A	#N/A	#N/A	0.00291834	3.3e-09	Waist circumference	TRUE	reported	ju9VE2	textfile	2	TRUE
130	rs588660	A	G	A	G	0.0144747	0.0062	0.585856	0.6	FALSE	FALSE	FALSE	finn-b-NAFLD	1	96886604	0.0487	#N/A	0.8981	Nonalcoholic fatty liver disease || id:finn-b-NAFLD	Nonalcoholic fatty liver disease	Nonalcoholic fatty liver disease || ||	TRUE	igd	#N/A	#N/A	#N/A	#N/A	#N/A	#N/A	#N/A	0.00218549	3.52e-11	Waist circumference	TRUE	reported	ju9VE2	textfile	2	TRUE
131	rs59227842	G	A	G	A	0.0192801	-0.1173	0.312432	0.3104	FALSE	FALSE	FALSE	finn-b-NAFLD	11	43692423	0.0516	#N/A	0.0231398	Nonalcoholic fatty liver disease || id:finn-b-NAFLD	Nonalcoholic fatty liver disease	Nonalcoholic fatty liver disease || ||	TRUE	igd	#N/A	#N/A	#N/A	#N/A	#N/A	#N/A	#N/A	0.00234316	1.91e-16	Waist circumference	TRUE	reported	ju9VE2	textfile	2	TRUE
132	rs6096886	G	A	G	A	-0.0239161	-0.0821	0.190052	0.1687	FALSE	FALSE	FALSE	finn-b-NAFLD	20	50951298	0.064	#N/A	0.1993	Nonalcoholic fatty liver disease || id:finn-b-NAFLD	Nonalcoholic fatty liver disease	Nonalcoholic fatty liver disease || ||	TRUE	igd	#N/A	#N/A	#N/A	#N/A	#N/A	#N/A	#N/A	0.00274229	2.76e-18	Waist circumference	TRUE	reported	ju9VE2	textfile	2	TRUE
133	rs61826867	G	A	G	A	0.0189886	0.0013	0.109772	0.08247	FALSE	FALSE	FALSE	finn-b-NAFLD	1	174377435	0.0869	#N/A	0.9884	Nonalcoholic fatty liver disease || id:finn-b-NAFLD	Nonalcoholic fatty liver disease	Nonalcoholic fatty liver disease || ||	TRUE	igd	#N/A	#N/A	#N/A	#N/A	#N/A	#N/A	#N/A	0.00343971	3.38e-08	Waist circumference	TRUE	reported	ju9VE2	textfile	2	TRUE
134	rs61888762	G	C	G	C	0.0269155	0.0514	0.322009	0.3391	FALSE	TRUE	FALSE	finn-b-NAFLD	11	27709630	0.0505	#N/A	0.3092	Nonalcoholic fatty liver disease || id:finn-b-NAFLD	Nonalcoholic fatty liver disease	Nonalcoholic fatty liver disease || ||	TRUE	igd	#N/A	#N/A	#N/A	#N/A	#N/A	#N/A	#N/A	0.00230029	1.28e-31	Waist circumference	TRUE	reported	ju9VE2	textfile	2	TRUE
135	rs61992671	G	A	G	A	-0.0129318	-0.0292	0.495639	0.513	FALSE	FALSE	FALSE	finn-b-NAFLD	14	101531854	0.0487	#N/A	0.5486	Nonalcoholic fatty liver disease || id:finn-b-NAFLD	Nonalcoholic fatty liver disease	Nonalcoholic fatty liver disease || ||	TRUE	igd	#N/A	#N/A	#N/A	#N/A	#N/A	#N/A	#N/A	0.00224606	8.54e-09	Waist circumference	TRUE	reported	ju9VE2	textfile	2	TRUE
136	rs62071997	C	T	C	T	0.0164525	-0.041	0.218662	0.2151	FALSE	FALSE	FALSE	finn-b-NAFLD	17	52927255	0.0582	#N/A	0.481	Nonalcoholic fatty liver disease || id:finn-b-NAFLD	Nonalcoholic fatty liver disease	Nonalcoholic fatty liver disease || ||	TRUE	igd	#N/A	#N/A	#N/A	#N/A	#N/A	#N/A	#N/A	0.00261513	3.15e-10	Waist circumference	TRUE	reported	ju9VE2	textfile	2	TRUE
137	rs62120394	A	G	A	G	0.020784	0.0178	0.29052	0.2669	FALSE	FALSE	FALSE	finn-b-NAFLD	19	18338709	0.0541	#N/A	0.7417	Nonalcoholic fatty liver disease || id:finn-b-NAFLD	Nonalcoholic fatty liver disease	Nonalcoholic fatty liver disease || ||	TRUE	igd	#N/A	#N/A	#N/A	#N/A	#N/A	#N/A	#N/A	0.00237797	2.34e-18	Waist circumference	TRUE	reported	ju9VE2	textfile	2	TRUE
138	rs62246314	A	G	A	G	0.0216879	-0.0138	0.101276	0.06404	FALSE	FALSE	FALSE	finn-b-NAFLD	3	9504099	0.0975	#N/A	0.8875	Nonalcoholic fatty liver disease || id:finn-b-NAFLD	Nonalcoholic fatty liver disease	Nonalcoholic fatty liver disease || ||	TRUE	igd	#N/A	#N/A	#N/A	#N/A	#N/A	#N/A	#N/A	0.00356414	1.17e-09	Waist circumference	TRUE	reported	ju9VE2	textfile	2	TRUE
139	rs62261725	G	A	G	A	-0.0181763	0.01	0.327437	0.3628	FALSE	FALSE	FALSE	finn-b-NAFLD	3	85898626	0.0498	#N/A	0.8404	Nonalcoholic fatty liver disease || id:finn-b-NAFLD	Nonalcoholic fatty liver disease	Nonalcoholic fatty liver disease || ||	TRUE	igd	#N/A	#N/A	#N/A	#N/A	#N/A	#N/A	#N/A	0.00229544	2.41e-15	Waist circumference	TRUE	reported	ju9VE2	textfile	2	TRUE
140	rs6433243	C	T	C	T	-0.0143354	0.0392	0.647708	0.6843	FALSE	FALSE	FALSE	finn-b-NAFLD	2	171605495	0.0516	#N/A	0.4476	Nonalcoholic fatty liver disease || id:finn-b-NAFLD	Nonalcoholic fatty liver disease	Nonalcoholic fatty liver disease || ||	TRUE	igd	#N/A	#N/A	#N/A	#N/A	#N/A	#N/A	#N/A	0.00225296	1.98e-10	Waist circumference	TRUE	reported	ju9VE2	textfile	2	TRUE
141	rs6575340	A	G	A	G	0.0175066	0.041	0.637416	0.627	FALSE	FALSE	FALSE	finn-b-NAFLD	14	94023972	0.0495	#N/A	0.408	Nonalcoholic fatty liver disease || id:finn-b-NAFLD	Nonalcoholic fatty liver disease	Nonalcoholic fatty liver disease || ||	TRUE	igd	#N/A	#N/A	#N/A	#N/A	#N/A	#N/A	#N/A	0.00224179	5.77e-15	Waist circumference	TRUE	reported	ju9VE2	textfile	2	TRUE
142	rs6687953	G	A	G	A	0.0132664	0.0228	0.391351	0.465	FALSE	FALSE	FALSE	finn-b-NAFLD	1	112293512	0.048	#N/A	0.634699	Nonalcoholic fatty liver disease || id:finn-b-NAFLD	Nonalcoholic fatty liver disease	Nonalcoholic fatty liver disease || ||	TRUE	igd	#N/A	#N/A	#N/A	#N/A	#N/A	#N/A	#N/A	0.00220383	1.75e-09	Waist circumference	TRUE	reported	ju9VE2	textfile	2	TRUE
143	rs6699744	T	A	G	A	0.0177257	-0.4022	0.614022	0.005577	TRUE	TRUE	FALSE	finn-b-NAFLD	1	72825144	0.3988	#N/A	0.3132	Nonalcoholic fatty liver disease || id:finn-b-NAFLD	Nonalcoholic fatty liver disease	Nonalcoholic fatty liver disease || ||	TRUE	igd	#N/A	#N/A	#N/A	#N/A	#N/A	#N/A	#N/A	0.00221833	1.35e-15	Waist circumference	TRUE	reported	ju9VE2	textfile	2	FALSE
144	rs6699744	T	A	T	A	0.0177257	0.0633	0.614022	0.6449	FALSE	TRUE	FALSE	finn-b-NAFLD	1	72825144	0.05	#N/A	0.2057	Nonalcoholic fatty liver disease || id:finn-b-NAFLD	Nonalcoholic fatty liver disease	Nonalcoholic fatty liver disease || ||	TRUE	igd	#N/A	#N/A	#N/A	#N/A	#N/A	#N/A	#N/A	0.00221833	1.35e-15	Waist circumference	TRUE	reported	ju9VE2	textfile	2	TRUE
145	rs6739755	G	A	G	A	-0.016792	-0.074	0.602976	0.5965	FALSE	FALSE	FALSE	finn-b-NAFLD	2	59330227	0.0487	#N/A	0.1288	Nonalcoholic fatty liver disease || id:finn-b-NAFLD	Nonalcoholic fatty liver disease	Nonalcoholic fatty liver disease || ||	TRUE	igd	#N/A	#N/A	#N/A	#N/A	#N/A	#N/A	#N/A	0.0022029	2.49e-14	Waist circumference	TRUE	reported	ju9VE2	textfile	2	TRUE
146	rs67632512	A	C	A	C	0.0191952	-0.061	0.117233	0.1541	FALSE	FALSE	FALSE	finn-b-NAFLD	5	92251840	0.0675	#N/A	0.3659	Nonalcoholic fatty liver disease || id:finn-b-NAFLD	Nonalcoholic fatty liver disease	Nonalcoholic fatty liver disease || ||	TRUE	igd	#N/A	#N/A	#N/A	#N/A	#N/A	#N/A	#N/A	0.00338782	1.46e-08	Waist circumference	TRUE	reported	ju9VE2	textfile	2	TRUE
147	rs7154982	A	G	A	G	-0.0151095	0.0307	0.268954	0.3047	FALSE	FALSE	FALSE	finn-b-NAFLD	14	25935161	0.0521	#N/A	0.5556	Nonalcoholic fatty liver disease || id:finn-b-NAFLD	Nonalcoholic fatty liver disease	Nonalcoholic fatty liver disease || ||	TRUE	igd	#N/A	#N/A	#N/A	#N/A	#N/A	#N/A	#N/A	0.00242686	4.79e-10	Waist circumference	TRUE	reported	ju9VE2	textfile	2	TRUE
148	rs71658797	A	T	A	T	0.0294912	0.0248	0.123925	0.1287	FALSE	TRUE	FALSE	finn-b-NAFLD	1	77967507	0.0717	#N/A	0.7294	Nonalcoholic fatty liver disease || id:finn-b-NAFLD	Nonalcoholic fatty liver disease	Nonalcoholic fatty liver disease || ||	TRUE	igd	#N/A	#N/A	#N/A	#N/A	#N/A	#N/A	#N/A	0.00327841	2.36e-19	Waist circumference	TRUE	reported	ju9VE2	textfile	2	TRUE
149	rs7171864	A	G	A	G	0.0136184	-0.0197	0.660927	0.7031	FALSE	FALSE	FALSE	finn-b-NAFLD	15	73227249	0.0525	#N/A	0.707801	Nonalcoholic fatty liver disease || id:finn-b-NAFLD	Nonalcoholic fatty liver disease	Nonalcoholic fatty liver disease || ||	TRUE	igd	#N/A	#N/A	#N/A	#N/A	#N/A	#N/A	#N/A	0.00228283	2.44e-09	Waist circumference	TRUE	reported	ju9VE2	textfile	2	TRUE
150	rs7206608	G	C	G	C	0.0130663	0.0038	0.322603	0.3527	FALSE	TRUE	FALSE	finn-b-NAFLD	16	82872628	0.05	#N/A	0.9399	Nonalcoholic fatty liver disease || id:finn-b-NAFLD	Nonalcoholic fatty liver disease	Nonalcoholic fatty liver disease || ||	TRUE	igd	#N/A	#N/A	#N/A	#N/A	#N/A	#N/A	#N/A	0.00230276	1.39e-08	Waist circumference	TRUE	reported	ju9VE2	textfile	2	TRUE
151	rs7239114	A	G	A	G	0.0126298	0.0224	0.542958	0.5365	FALSE	FALSE	FALSE	finn-b-NAFLD	18	45921214	0.048	#N/A	0.640801	Nonalcoholic fatty liver disease || id:finn-b-NAFLD	Nonalcoholic fatty liver disease	Nonalcoholic fatty liver disease || ||	TRUE	igd	#N/A	#N/A	#N/A	#N/A	#N/A	#N/A	#N/A	0.00217368	6.24e-09	Waist circumference	TRUE	reported	ju9VE2	textfile	2	TRUE
152	rs7259070	C	T	C	T	0.017366	-0.0154	0.599006	0.5624	FALSE	FALSE	FALSE	finn-b-NAFLD	19	47562509	0.0483	#N/A	0.749799	Nonalcoholic fatty liver disease || id:finn-b-NAFLD	Nonalcoholic fatty liver disease	Nonalcoholic fatty liver disease || ||	TRUE	igd	#N/A	#N/A	#N/A	#N/A	#N/A	#N/A	#N/A	0.0022141	4.4e-15	Waist circumference	TRUE	reported	ju9VE2	textfile	2	TRUE
153	rs72793809	T	C	T	C	0.0265338	0.1519	0.404386	0.4131	FALSE	FALSE	FALSE	finn-b-NAFLD	16	28832382	0.0486	#N/A	0.00177599	Nonalcoholic fatty liver disease || id:finn-b-NAFLD	Nonalcoholic fatty liver disease	Nonalcoholic fatty liver disease || ||	TRUE	igd	#N/A	#N/A	#N/A	#N/A	#N/A	#N/A	#N/A	0.00219042	9.1e-34	Waist circumference	TRUE	reported	ju9VE2	textfile	2	TRUE
154	rs72892910	T	G	T	G	0.0318365	0.0546	0.170442	0.2028	FALSE	FALSE	FALSE	finn-b-NAFLD	6	50816887	0.0594	#N/A	0.3579	Nonalcoholic fatty liver disease || id:finn-b-NAFLD	Nonalcoholic fatty liver disease	Nonalcoholic fatty liver disease || ||	TRUE	igd	#N/A	#N/A	#N/A	#N/A	#N/A	#N/A	#N/A	0.00286885	1.31e-28	Waist circumference	TRUE	reported	ju9VE2	textfile	2	TRUE
155	rs72917544	A	G	A	G	-0.0168827	0.0321	0.185619	0.1412	FALSE	FALSE	FALSE	finn-b-NAFLD	2	175241566	0.0689	#N/A	0.641	Nonalcoholic fatty liver disease || id:finn-b-NAFLD	Nonalcoholic fatty liver disease	Nonalcoholic fatty liver disease || ||	TRUE	igd	#N/A	#N/A	#N/A	#N/A	#N/A	#N/A	#N/A	0.00278077	1.27e-09	Waist circumference	TRUE	reported	ju9VE2	textfile	2	TRUE
156	rs73140125	G	A	G	A	-0.0192219	-0.1924	0.129831	0.1187	FALSE	FALSE	FALSE	finn-b-NAFLD	3	88064401	0.074	#N/A	0.00934093	Nonalcoholic fatty liver disease || id:finn-b-NAFLD	Nonalcoholic fatty liver disease	Nonalcoholic fatty liver disease || ||	TRUE	igd	#N/A	#N/A	#N/A	#N/A	#N/A	#N/A	#N/A	0.0032274	2.59e-09	Waist circumference	TRUE	reported	ju9VE2	textfile	2	TRUE
157	rs73213484	T	A	T	A	-0.0190998	-0.051	0.139056	0.1474	FALSE	TRUE	FALSE	finn-b-NAFLD	4	28489339	0.0679	#N/A	0.452701	Nonalcoholic fatty liver disease || id:finn-b-NAFLD	Nonalcoholic fatty liver disease	Nonalcoholic fatty liver disease || ||	TRUE	igd	#N/A	#N/A	#N/A	#N/A	#N/A	#N/A	#N/A	0.00311019	8.21e-10	Waist circumference	TRUE	reported	ju9VE2	textfile	2	TRUE
158	rs7377083	A	C	A	C	0.0144262	0.0345	0.431316	0.4671	FALSE	FALSE	FALSE	finn-b-NAFLD	4	102708997	0.0481	#N/A	0.4739	Nonalcoholic fatty liver disease || id:finn-b-NAFLD	Nonalcoholic fatty liver disease	Nonalcoholic fatty liver disease || ||	TRUE	igd	#N/A	#N/A	#N/A	#N/A	#N/A	#N/A	#N/A	0.00218612	4.15e-11	Waist circumference	TRUE	reported	ju9VE2	textfile	2	TRUE
159	rs73985439	C	A	C	A	0.014277	0.0187	0.30768	0.3026	FALSE	FALSE	FALSE	finn-b-NAFLD	2	212299249	0.0522	#N/A	0.7199	Nonalcoholic fatty liver disease || id:finn-b-NAFLD	Nonalcoholic fatty liver disease	Nonalcoholic fatty liver disease || ||	TRUE	igd	#N/A	#N/A	#N/A	#N/A	#N/A	#N/A	#N/A	0.00233516	9.73e-10	Waist circumference	TRUE	reported	ju9VE2	textfile	2	TRUE
160	rs7442885	G	C	G	C	-0.0221708	-0.0831	0.210104	0.1864	FALSE	TRUE	FALSE	finn-b-NAFLD	5	87682877	0.0617	#N/A	0.1777	Nonalcoholic fatty liver disease || id:finn-b-NAFLD	Nonalcoholic fatty liver disease	Nonalcoholic fatty liver disease || ||	TRUE	igd	#N/A	#N/A	#N/A	#N/A	#N/A	#N/A	#N/A	0.00264733	5.55e-17	Waist circumference	TRUE	reported	ju9VE2	textfile	2	TRUE
161	rs750090	C	T	C	T	-0.0125527	0.017	0.356153	0.4137	FALSE	FALSE	FALSE	finn-b-NAFLD	4	152931436	0.0487	#N/A	0.7263	Nonalcoholic fatty liver disease || id:finn-b-NAFLD	Nonalcoholic fatty liver disease	Nonalcoholic fatty liver disease || ||	TRUE	igd	#N/A	#N/A	#N/A	#N/A	#N/A	#N/A	#N/A	0.00226957	3.19e-08	Waist circumference	TRUE	reported	ju9VE2	textfile	2	TRUE
162	rs76040172	A	G	A	G	-0.0337348	-0.2107	0.0544397	0.08163	FALSE	FALSE	FALSE	finn-b-NAFLD	21	46488959	0.0884	#N/A	0.0171002	Nonalcoholic fatty liver disease || id:finn-b-NAFLD	Nonalcoholic fatty liver disease	Nonalcoholic fatty liver disease || ||	TRUE	igd	#N/A	#N/A	#N/A	#N/A	#N/A	#N/A	#N/A	0.00475228	1.26e-12	Waist circumference	TRUE	reported	ju9VE2	textfile	2	TRUE
163	rs7635592	T	C	T	C	0.0213705	0.0412	0.204534	0.214	FALSE	FALSE	FALSE	finn-b-NAFLD	3	131750466	0.0585	#N/A	0.4811	Nonalcoholic fatty liver disease || id:finn-b-NAFLD	Nonalcoholic fatty liver disease	Nonalcoholic fatty liver disease || ||	TRUE	igd	TRUE	rs7635592	rs1406778	T	C	C	T	0.00267244	1.28e-15	Waist circumference	TRUE	reported	ju9VE2	textfile	2	TRUE
164	rs76895963	G	T	G	T	0.0548145	-0.3605	0.0192794	0.03114	FALSE	FALSE	FALSE	finn-b-NAFLD	12	4384844	0.1443	#N/A	0.0124701	Nonalcoholic fatty liver disease || id:finn-b-NAFLD	Nonalcoholic fatty liver disease	Nonalcoholic fatty liver disease || ||	TRUE	igd	#N/A	#N/A	#N/A	#N/A	#N/A	#N/A	#N/A	0.00833756	4.89e-11	Waist circumference	TRUE	reported	ju9VE2	textfile	2	TRUE
165	rs7707394	A	G	A	G	-0.0162906	-0.0382	0.354316	0.3729	FALSE	FALSE	FALSE	finn-b-NAFLD	5	74472939	0.0495	#N/A	0.4407	Nonalcoholic fatty liver disease || id:finn-b-NAFLD	Nonalcoholic fatty liver disease	Nonalcoholic fatty liver disease || ||	TRUE	igd	#N/A	#N/A	#N/A	#N/A	#N/A	#N/A	#N/A	0.00224447	3.93e-13	Waist circumference	TRUE	reported	ju9VE2	textfile	2	TRUE
166	rs7728095	G	A	G	A	0.0143	-0.0044	0.388016	0.3623	FALSE	FALSE	FALSE	finn-b-NAFLD	5	139084092	0.05	#N/A	0.9294	Nonalcoholic fatty liver disease || id:finn-b-NAFLD	Nonalcoholic fatty liver disease	Nonalcoholic fatty liver disease || ||	TRUE	igd	#N/A	#N/A	#N/A	#N/A	#N/A	#N/A	#N/A	0.00222461	1.29e-10	Waist circumference	TRUE	reported	ju9VE2	textfile	2	TRUE
167	rs7752202	T	C	T	C	0.0205575	0.0791	0.142936	0.1054	FALSE	FALSE	FALSE	finn-b-NAFLD	6	33389603	0.0781	#N/A	0.3115	Nonalcoholic fatty liver disease || id:finn-b-NAFLD	Nonalcoholic fatty liver disease	Nonalcoholic fatty liver disease || ||	TRUE	igd	#N/A	#N/A	#N/A	#N/A	#N/A	#N/A	#N/A	0.00306988	2.14e-11	Waist circumference	TRUE	reported	ju9VE2	textfile	2	TRUE
168	rs7925100	A	G	A	G	0.0137291	-0.0035	0.396337	0.2952	FALSE	FALSE	FALSE	finn-b-NAFLD	11	118941596	0.0527	#N/A	0.9476	Nonalcoholic fatty liver disease || id:finn-b-NAFLD	Nonalcoholic fatty liver disease	Nonalcoholic fatty liver disease || ||	TRUE	igd	#N/A	#N/A	#N/A	#N/A	#N/A	#N/A	#N/A	0.00219878	4.27e-10	Waist circumference	TRUE	reported	ju9VE2	textfile	2	TRUE
169	rs7930006	T	C	T	C	-0.0133751	-0.092	0.454217	0.4629	FALSE	FALSE	FALSE	finn-b-NAFLD	11	133183856	0.0481	#N/A	0.0557096	Nonalcoholic fatty liver disease || id:finn-b-NAFLD	Nonalcoholic fatty liver disease	Nonalcoholic fatty liver disease || ||	TRUE	igd	#N/A	#N/A	#N/A	#N/A	#N/A	#N/A	#N/A	0.002166	6.62e-10	Waist circumference	TRUE	reported	ju9VE2	textfile	2	TRUE
170	rs7948120	T	C	T	C	-0.0141338	0.0397	0.25928	0.1987	FALSE	FALSE	FALSE	finn-b-NAFLD	11	28763321	0.0604	#N/A	0.5108	Nonalcoholic fatty liver disease || id:finn-b-NAFLD	Nonalcoholic fatty liver disease	Nonalcoholic fatty liver disease || ||	TRUE	igd	#N/A	#N/A	#N/A	#N/A	#N/A	#N/A	#N/A	0.00246739	1.02e-08	Waist circumference	TRUE	reported	ju9VE2	textfile	2	TRUE
171	rs7952436	T	C	T	C	-0.0260472	-0.1709	0.0832031	0.05217	FALSE	FALSE	FALSE	finn-b-NAFLD	11	67024534	0.108	#N/A	0.1134	Nonalcoholic fatty liver disease || id:finn-b-NAFLD	Nonalcoholic fatty liver disease	Nonalcoholic fatty liver disease || ||	TRUE	igd	#N/A	#N/A	#N/A	#N/A	#N/A	#N/A	#N/A	0.00389664	2.32e-11	Waist circumference	TRUE	reported	ju9VE2	textfile	2	TRUE
172	rs80135947	C	A	C	A	0.0251166	0.0464	0.195339	0.2384	FALSE	FALSE	FALSE	finn-b-NAFLD	17	65836001	0.0563	#N/A	0.4092	Nonalcoholic fatty liver disease || id:finn-b-NAFLD	Nonalcoholic fatty liver disease	Nonalcoholic fatty liver disease || ||	TRUE	igd	#N/A	#N/A	#N/A	#N/A	#N/A	#N/A	#N/A	0.00271445	2.2e-20	Waist circumference	TRUE	reported	ju9VE2	textfile	2	TRUE
173	rs80330591	A	G	A	G	-0.0166223	0.0224	0.146844	0.1795	FALSE	FALSE	FALSE	finn-b-NAFLD	2	159368720	0.0623	#N/A	0.719701	Nonalcoholic fatty liver disease || id:finn-b-NAFLD	Nonalcoholic fatty liver disease	Nonalcoholic fatty liver disease || ||	TRUE	igd	#N/A	#N/A	#N/A	#N/A	#N/A	#N/A	#N/A	0.00303827	4.48e-08	Waist circumference	TRUE	reported	ju9VE2	textfile	2	TRUE
174	rs8097672	T	A	T	A	0.0181817	-0.0558	0.145172	0.1731	FALSE	TRUE	FALSE	finn-b-NAFLD	18	1839601	0.0631	#N/A	0.3764	Nonalcoholic fatty liver disease || id:finn-b-NAFLD	Nonalcoholic fatty liver disease	Nonalcoholic fatty liver disease || ||	TRUE	igd	#N/A	#N/A	#N/A	#N/A	#N/A	#N/A	#N/A	0.00306494	2.99e-09	Waist circumference	TRUE	reported	ju9VE2	textfile	2	TRUE
175	rs809955	A	G	A	G	-0.0123432	-0.0086	0.366632	0.357	FALSE	FALSE	FALSE	finn-b-NAFLD	4	140874760	0.05	#N/A	0.8636	Nonalcoholic fatty liver disease || id:finn-b-NAFLD	Nonalcoholic fatty liver disease	Nonalcoholic fatty liver disease || ||	TRUE	igd	#N/A	#N/A	#N/A	#N/A	#N/A	#N/A	#N/A	0.00223476	3.33e-08	Waist circumference	TRUE	reported	ju9VE2	textfile	2	TRUE
176	rs815163	C	T	C	T	-0.0135052	0.0212	0.561603	0.472	FALSE	FALSE	FALSE	finn-b-NAFLD	1	190294726	0.048	#N/A	0.6586	Nonalcoholic fatty liver disease || id:finn-b-NAFLD	Nonalcoholic fatty liver disease	Nonalcoholic fatty liver disease || ||	TRUE	igd	#N/A	#N/A	#N/A	#N/A	#N/A	#N/A	#N/A	0.00216641	4.55e-10	Waist circumference	TRUE	reported	ju9VE2	textfile	2	TRUE
177	rs8192675	C	T	C	T	0.0153014	0.0933	0.287375	0.2636	FALSE	FALSE	FALSE	finn-b-NAFLD	3	170724883	0.0542	#N/A	0.0847598	Nonalcoholic fatty liver disease || id:finn-b-NAFLD	Nonalcoholic fatty liver disease	Nonalcoholic fatty liver disease || ||	TRUE	igd	#N/A	#N/A	#N/A	#N/A	#N/A	#N/A	#N/A	0.00237273	1.13e-10	Waist circumference	TRUE	reported	ju9VE2	textfile	2	TRUE
178	rs868784	A	G	A	G	-0.0122956	-0.0303	0.38024	0.3934	FALSE	FALSE	FALSE	finn-b-NAFLD	11	43944388	0.049	#N/A	0.536801	Nonalcoholic fatty liver disease || id:finn-b-NAFLD	Nonalcoholic fatty liver disease	Nonalcoholic fatty liver disease || ||	TRUE	igd	#N/A	#N/A	#N/A	#N/A	#N/A	#N/A	#N/A	0.00222281	3.18e-08	Waist circumference	TRUE	reported	ju9VE2	textfile	2	TRUE
179	rs879620	T	C	T	C	0.0209893	-0.0881	0.615276	0.5788	FALSE	FALSE	FALSE	finn-b-NAFLD	16	4015729	0.0485	#N/A	0.0695601	Nonalcoholic fatty liver disease || id:finn-b-NAFLD	Nonalcoholic fatty liver disease	Nonalcoholic fatty liver disease || ||	TRUE	igd	#N/A	#N/A	#N/A	#N/A	#N/A	#N/A	#N/A	0.00221895	3.13e-21	Waist circumference	TRUE	reported	ju9VE2	textfile	2	TRUE
180	rs9370243	T	G	T	G	0.0220827	-0.0707	0.0810545	0.1018	FALSE	FALSE	FALSE	finn-b-NAFLD	6	53789830	0.0793	#N/A	0.3724	Nonalcoholic fatty liver disease || id:finn-b-NAFLD	Nonalcoholic fatty liver disease	Nonalcoholic fatty liver disease || ||	TRUE	igd	#N/A	#N/A	#N/A	#N/A	#N/A	#N/A	#N/A	0.00394402	2.16e-08	Waist circumference	TRUE	reported	ju9VE2	textfile	2	TRUE
Waist-to-hip ratio
	SNP	effect_allele.exposure	other_allele.exposure	effect_allele.outcome	other_allele.outcome	beta.exposure	beta.outcome	eaf.exposure	eaf.outcome	remove	palindromic	ambiguous	id.outcome	chr	pos	se.outcome	samplesize.outcome	pval.outcome	outcome	originalname.outcome	outcome.deprecated	mr_keep.outcome	data_source.outcome	pval.exposure	se.exposure	exposure	mr_keep.exposure	pval_origin.exposure	id.exposure	data_source.exposure	action	mr_keep
1	rs10245353	A	C	A	C	0.035	0.0264	0.1833	0.2641	FALSE	FALSE	FALSE	finn-b-NAFLD	7	25858614	0.0544	#N/A	0.6278	Nonalcoholic fatty liver disease || id:finn-b-NAFLD	Nonalcoholic fatty liver disease	Nonalcoholic fatty liver disease || ||	TRUE	igd	8.4004e-16	0.0043	Waist-to-hip ratio	TRUE	reported	fBxye3	textfile	2	TRUE
2	rs10804591	A	C	A	C	0.024	-0.0001	0.85	0.8003	FALSE	FALSE	FALSE	finn-b-NAFLD	3	129334233	0.0599	#N/A	0.9985	Nonalcoholic fatty liver disease || id:finn-b-NAFLD	Nonalcoholic fatty liver disease	Nonalcoholic fatty liver disease || ||	TRUE	igd	6.59994e-09	0.0042	Waist-to-hip ratio	TRUE	reported	fBxye3	textfile	2	TRUE
3	rs10842707	T	C	T	C	0.032	0.0097	0.1667	0.2707	FALSE	FALSE	FALSE	finn-b-NAFLD	12	26471364	0.0538	#N/A	0.8566	Nonalcoholic fatty liver disease || id:finn-b-NAFLD	Nonalcoholic fatty liver disease	Nonalcoholic fatty liver disease || ||	TRUE	igd	4.40048e-16	0.004	Waist-to-hip ratio	TRUE	reported	fBxye3	textfile	2	TRUE
4	rs10991437	A	C	A	C	0.031	0.1649	0.1	0.07943	FALSE	FALSE	FALSE	finn-b-NAFLD	9	107735920	0.0884	#N/A	0.0621899	Nonalcoholic fatty liver disease || id:finn-b-NAFLD	Nonalcoholic fatty liver disease	Nonalcoholic fatty liver disease || ||	TRUE	igd	1e-08	0.0054	Waist-to-hip ratio	TRUE	reported	fBxye3	textfile	2	TRUE
5	rs11231693	A	G	A	G	0.041	-0.0054	0.0417	0.0751	FALSE	FALSE	FALSE	finn-b-NAFLD	11	63862612	0.0911	#N/A	0.9524	Nonalcoholic fatty liver disease || id:finn-b-NAFLD	Nonalcoholic fatty liver disease	Nonalcoholic fatty liver disease || ||	TRUE	igd	4.49997e-08	0.0075	Waist-to-hip ratio	TRUE	reported	fBxye3	textfile	2	TRUE
6	rs1128249	T	G	T	G	-0.028	-0.0721	0.4417	0.3479	FALSE	FALSE	FALSE	finn-b-NAFLD	2	165528624	0.0503	#N/A	0.1515	Nonalcoholic fatty liver disease || id:finn-b-NAFLD	Nonalcoholic fatty liver disease	Nonalcoholic fatty liver disease || ||	TRUE	igd	1.99986e-15	0.0035	Waist-to-hip ratio	TRUE	reported	fBxye3	textfile	2	TRUE
7	rs12679556	G	T	G	T	0.027	-0.043	0.2083	0.2428	FALSE	FALSE	FALSE	finn-b-NAFLD	8	72514228	0.0561	#N/A	0.4432	Nonalcoholic fatty liver disease || id:finn-b-NAFLD	Nonalcoholic fatty liver disease	Nonalcoholic fatty liver disease || ||	TRUE	igd	2.09991e-11	0.004	Waist-to-hip ratio	TRUE	reported	fBxye3	textfile	2	TRUE
8	rs1294410	C	T	C	T	0.031	-0.0648	0.625	0.6393	FALSE	FALSE	FALSE	finn-b-NAFLD	6	6738752	0.0498	#N/A	0.1933	Nonalcoholic fatty liver disease || id:finn-b-NAFLD	Nonalcoholic fatty liver disease	Nonalcoholic fatty liver disease || ||	TRUE	igd	1.99986e-18	0.0035	Waist-to-hip ratio	TRUE	reported	fBxye3	textfile	2	TRUE
9	rs1385167	G	A	G	A	0.029	0.0402	0.1417	0.1996	FALSE	FALSE	FALSE	finn-b-NAFLD	2	66200648	0.0598	#N/A	0.5018	Nonalcoholic fatty liver disease || id:finn-b-NAFLD	Nonalcoholic fatty liver disease	Nonalcoholic fatty liver disease || ||	TRUE	igd	1.79999e-09	0.0049	Waist-to-hip ratio	TRUE	reported	fBxye3	textfile	2	TRUE
10	rs1440372	C	T	C	T	0.024	0.0381	0.7417	0.7469	FALSE	FALSE	FALSE	finn-b-NAFLD	15	67033151	0.0551	#N/A	0.4889	Nonalcoholic fatty liver disease || id:finn-b-NAFLD	Nonalcoholic fatty liver disease	Nonalcoholic fatty liver disease || ||	TRUE	igd	1.09999e-10	0.0038	Waist-to-hip ratio	TRUE	reported	fBxye3	textfile	2	TRUE
11	rs1569135	G	A	G	A	-0.021	0.0357	0.4667	0.4276	FALSE	FALSE	FALSE	finn-b-NAFLD	2	188115398	0.0483	#N/A	0.4602	Nonalcoholic fatty liver disease || id:finn-b-NAFLD	Nonalcoholic fatty liver disease	Nonalcoholic fatty liver disease || ||	TRUE	igd	5.60003e-10	0.0034	Waist-to-hip ratio	TRUE	reported	fBxye3	textfile	2	TRUE
12	rs17451107	C	T	C	T	-0.026	0.0329	0.375	0.3131	FALSE	FALSE	FALSE	finn-b-NAFLD	3	156797609	0.0515	#N/A	0.522801	Nonalcoholic fatty liver disease || id:finn-b-NAFLD	Nonalcoholic fatty liver disease	Nonalcoholic fatty liver disease || ||	TRUE	igd	1.10002e-12	0.0036	Waist-to-hip ratio	TRUE	reported	fBxye3	textfile	2	TRUE
13	rs17819328	G	T	G	T	0.021	0.0418	0.45	0.466	FALSE	FALSE	FALSE	finn-b-NAFLD	3	12489342	0.0482	#N/A	0.3853	Nonalcoholic fatty liver disease || id:finn-b-NAFLD	Nonalcoholic fatty liver disease	Nonalcoholic fatty liver disease || ||	TRUE	igd	2.39999e-09	0.0035	Waist-to-hip ratio	TRUE	reported	fBxye3	textfile	2	TRUE
14	rs2276824	G	C	G	C	-0.024	-0.063	0.5167	0.5407	FALSE	TRUE	TRUE	finn-b-NAFLD	3	52637486	0.0482	#N/A	0.1919	Nonalcoholic fatty liver disease || id:finn-b-NAFLD	Nonalcoholic fatty liver disease	Nonalcoholic fatty liver disease || ||	TRUE	igd	3.19963e-11	0.0036	Waist-to-hip ratio	TRUE	reported	fBxye3	textfile	2	FALSE
15	rs2294239	G	A	G	A	-0.025	-0.0105	0.45	0.3976	FALSE	FALSE	FALSE	finn-b-NAFLD	22	29449477	0.0492	#N/A	0.8306	Nonalcoholic fatty liver disease || id:finn-b-NAFLD	Nonalcoholic fatty liver disease	Nonalcoholic fatty liver disease || ||	TRUE	igd	7.19946e-13	0.0035	Waist-to-hip ratio	TRUE	reported	fBxye3	textfile	2	TRUE
16	rs2645294	T	C	T	C	0.031	0.0605	0.5345	0.6812	FALSE	FALSE	FALSE	finn-b-NAFLD	1	119574587	0.0514	#N/A	0.2395	Nonalcoholic fatty liver disease || id:finn-b-NAFLD	Nonalcoholic fatty liver disease	Nonalcoholic fatty liver disease || ||	TRUE	igd	1.69981e-19	0.0035	Waist-to-hip ratio	TRUE	reported	fBxye3	textfile	2	TRUE
17	rs303084	A	G	A	G	0.023	0.0416	0.7833	0.8444	FALSE	FALSE	FALSE	finn-b-NAFLD	4	124066948	0.0662	#N/A	0.5299	Nonalcoholic fatty liver disease || id:finn-b-NAFLD	Nonalcoholic fatty liver disease	Nonalcoholic fatty liver disease || ||	TRUE	igd	3.89996e-08	0.0042	Waist-to-hip ratio	TRUE	reported	fBxye3	textfile	2	TRUE
18	rs4081724	A	G	A	G	-0.035	-0.022	0.15	0.07006	FALSE	FALSE	FALSE	finn-b-NAFLD	19	33824946	0.0937	#N/A	0.8144	Nonalcoholic fatty liver disease || id:finn-b-NAFLD	Nonalcoholic fatty liver disease	Nonalcoholic fatty liver disease || ||	TRUE	igd	7.39946e-12	0.0051	Waist-to-hip ratio	TRUE	reported	fBxye3	textfile	2	TRUE
19	rs459193	G	A	G	A	-0.026	0.029	0.7833	0.683	FALSE	FALSE	FALSE	finn-b-NAFLD	5	55806751	0.0514	#N/A	0.5727	Nonalcoholic fatty liver disease || id:finn-b-NAFLD	Nonalcoholic fatty liver disease	Nonalcoholic fatty liver disease || ||	TRUE	igd	1.59993e-11	0.0038	Waist-to-hip ratio	TRUE	reported	fBxye3	textfile	2	TRUE
20	rs6090583	G	A	G	A	-0.022	-0.0732	0.5667	0.502	FALSE	FALSE	FALSE	finn-b-NAFLD	20	45558831	0.0482	#N/A	0.1286	Nonalcoholic fatty liver disease || id:finn-b-NAFLD	Nonalcoholic fatty liver disease	Nonalcoholic fatty liver disease || ||	TRUE	igd	6.20012e-11	0.0034	Waist-to-hip ratio	TRUE	reported	fBxye3	textfile	2	TRUE
21	rs6772129	G	A	G	A	-0.035	-0.0518	0.2417	0.2989	FALSE	FALSE	FALSE	finn-b-NAFLD	3	64700425	0.0523	#N/A	0.3223	Nonalcoholic fatty liver disease || id:finn-b-NAFLD	Nonalcoholic fatty liver disease	Nonalcoholic fatty liver disease || ||	TRUE	igd	3.40017e-21	0.0037	Waist-to-hip ratio	TRUE	reported	fBxye3	textfile	2	TRUE
22	rs714515	A	G	A	G	-0.027	-0.072	0.5417	0.5586	FALSE	FALSE	FALSE	finn-b-NAFLD	1	172352990	0.0482	#N/A	0.1352	Nonalcoholic fatty liver disease || id:finn-b-NAFLD	Nonalcoholic fatty liver disease	Nonalcoholic fatty liver disease || ||	TRUE	igd	4.40048e-15	0.0034	Waist-to-hip ratio	TRUE	reported	fBxye3	textfile	2	TRUE
23	rs7705502	A	G	A	G	0.027	0.0327	0.2917	0.4142	FALSE	FALSE	FALSE	finn-b-NAFLD	5	173320815	0.0486	#N/A	0.502	Nonalcoholic fatty liver disease || id:finn-b-NAFLD	Nonalcoholic fatty liver disease	Nonalcoholic fatty liver disease || ||	TRUE	igd	4.70002e-14	0.0036	Waist-to-hip ratio	TRUE	reported	fBxye3	textfile	2	TRUE
24	rs8030605	A	G	A	G	0.03	0.166	0.1583	0.08273	FALSE	FALSE	FALSE	finn-b-NAFLD	15	56504598	0.0865	#N/A	0.0549895	Nonalcoholic fatty liver disease || id:finn-b-NAFLD	Nonalcoholic fatty liver disease	Nonalcoholic fatty liver disease || ||	TRUE	igd	8.79995e-09	0.0053	Waist-to-hip ratio	TRUE	reported	fBxye3	textfile	2	TRUE
25	rs8042543	T	C	T	C	-0.026	-0.0011	0.15	0.2597	FALSE	FALSE	FALSE	finn-b-NAFLD	15	31708263	0.0548	#N/A	0.984	Nonalcoholic fatty liver disease || id:finn-b-NAFLD	Nonalcoholic fatty liver disease	Nonalcoholic fatty liver disease || ||	TRUE	igd	1.2e-09	0.0043	Waist-to-hip ratio	TRUE	reported	fBxye3	textfile	2	TRUE
26	rs878639	G	A	G	A	-0.021	-0.0063	0.3583	0.4456	FALSE	FALSE	FALSE	finn-b-NAFLD	20	33894463	0.0482	#N/A	0.8961	Nonalcoholic fatty liver disease || id:finn-b-NAFLD	Nonalcoholic fatty liver disease	Nonalcoholic fatty liver disease || ||	TRUE	igd	5.1e-09	0.0035	Waist-to-hip ratio	TRUE	reported	fBxye3	textfile	2	TRUE
27	rs905938	C	T	C	T	-0.025	0.0289	0.325	0.233	FALSE	FALSE	FALSE	finn-b-NAFLD	1	154991389	0.0566	#N/A	0.6102	Nonalcoholic fatty liver disease || id:finn-b-NAFLD	Nonalcoholic fatty liver disease	Nonalcoholic fatty liver disease || ||	TRUE	igd	7.29995e-10	0.004	Waist-to-hip ratio	TRUE	reported	fBxye3	textfile	2	TRUE
28	rs979012	C	T	C	T	-0.027	-0.0415	0.6417	0.703	FALSE	FALSE	FALSE	finn-b-NAFLD	20	6623374	0.0524	#N/A	0.4285	Nonalcoholic fatty liver disease || id:finn-b-NAFLD	Nonalcoholic fatty liver disease	Nonalcoholic fatty liver disease || ||	TRUE	igd	3.29989e-14	0.0036	Waist-to-hip ratio	TRUE	reported	fBxye3	textfile	2	TRUE
29	rs998584	A	C	A	C	0.043	0.0266	0.475	0.4824	FALSE	FALSE	FALSE	finn-b-NAFLD	6	43757896	0.0482	#N/A	0.581	Nonalcoholic fatty liver disease || id:finn-b-NAFLD	Nonalcoholic fatty liver disease	Nonalcoholic fatty liver disease || ||	TRUE	igd	1.10002e-29	0.0038	Waist-to-hip ratio	TRUE	reported	fBxye3	textfile	2	TRUE
Testosterone level
	SNP	effect_allele.exposure	other_allele.exposure	effect_allele.outcome	other_allele.outcome	beta.exposure	beta.outcome	eaf.exposure	eaf.outcome	remove	palindromic	ambiguous	id.outcome	chr	pos	se.outcome	samplesize.outcome	pval.outcome	outcome	originalname.outcome	outcome.deprecated	mr_keep.outcome	data_source.outcome	proxy.outcome	target_snp.outcome	proxy_snp.outcome	target_a1.outcome	target_a2.outcome	proxy_a1.outcome	proxy_a2.outcome	se.exposure	pval.exposure	exposure	mr_keep.exposure	pval_origin.exposure	id.exposure	data_source.exposure	action	mr_keep
1	rs10048173	G	A	G	A	-0.0242187	0.0121	0.51252	0.5334	FALSE	FALSE	FALSE	finn-b-NAFLD	17	45592266	0.0479	#N/A	0.8009	Nonalcoholic fatty liver disease || id:finn-b-NAFLD	Nonalcoholic fatty liver disease	Nonalcoholic fatty liver disease || ||	TRUE	igd	#N/A	#N/A	#N/A	#N/A	#N/A	#N/A	#N/A	0.00252788	1.69981e-22	Testosterone levels	TRUE	reported	h2pHMv	textfile	2	TRUE
2	rs10136290	G	A	G	A	0.0162591	0.1105	0.413658	0.4104	FALSE	FALSE	FALSE	finn-b-NAFLD	14	98539697	0.0487	#N/A	0.0231798	Nonalcoholic fatty liver disease || id:finn-b-NAFLD	Nonalcoholic fatty liver disease	Nonalcoholic fatty liver disease || ||	TRUE	igd	#N/A	#N/A	#N/A	#N/A	#N/A	#N/A	#N/A	0.00257663	7.39946e-11	Testosterone levels	TRUE	reported	h2pHMv	textfile	2	TRUE
3	rs10504255	A	G	A	G	-0.0173977	-0.0532	0.663147	0.6229	FALSE	FALSE	FALSE	finn-b-NAFLD	8	59398461	0.0494	#N/A	0.2813	Nonalcoholic fatty liver disease || id:finn-b-NAFLD	Nonalcoholic fatty liver disease	Nonalcoholic fatty liver disease || ||	TRUE	igd	#N/A	#N/A	#N/A	#N/A	#N/A	#N/A	#N/A	0.00268685	6.1e-10	Testosterone levels	TRUE	reported	h2pHMv	textfile	2	TRUE
4	rs1050541	G	T	G	T	-0.0486949	0.0212	0.55699	0.5426	FALSE	FALSE	FALSE	finn-b-NAFLD	17	7560835	0.0484	#N/A	0.6615	Nonalcoholic fatty liver disease || id:finn-b-NAFLD	Nonalcoholic fatty liver disease	Nonalcoholic fatty liver disease || ||	TRUE	igd	#N/A	#N/A	#N/A	#N/A	#N/A	#N/A	#N/A	0.00261308	1e-79	Testosterone levels	TRUE	reported	h2pHMv	textfile	2	TRUE
5	rs10743398	A	G	A	G	0.0163223	-0.0413	0.704902	0.7289	FALSE	FALSE	FALSE	finn-b-NAFLD	12	20989164	0.0538	#N/A	0.4433	Nonalcoholic fatty liver disease || id:finn-b-NAFLD	Nonalcoholic fatty liver disease	Nonalcoholic fatty liver disease || ||	TRUE	igd	#N/A	#N/A	#N/A	#N/A	#N/A	#N/A	#N/A	0.00281544	9.20005e-10	Testosterone levels	TRUE	reported	h2pHMv	textfile	2	TRUE
6	rs10757893	G	A	G	A	-0.0137428	-0.0149	0.424776	0.4028	FALSE	FALSE	FALSE	finn-b-NAFLD	9	29599001	0.0491	#N/A	0.7619	Nonalcoholic fatty liver disease || id:finn-b-NAFLD	Nonalcoholic fatty liver disease	Nonalcoholic fatty liver disease || ||	TRUE	igd	#N/A	#N/A	#N/A	#N/A	#N/A	#N/A	#N/A	0.00260112	9.29994e-09	Testosterone levels	TRUE	reported	h2pHMv	textfile	2	TRUE
7	rs10962395	C	T	C	T	0.0141017	0.0003	0.41742	0.414	FALSE	FALSE	FALSE	finn-b-NAFLD	9	16363553	0.049	#N/A	0.9952	Nonalcoholic fatty liver disease || id:finn-b-NAFLD	Nonalcoholic fatty liver disease	Nonalcoholic fatty liver disease || ||	TRUE	igd	#N/A	#N/A	#N/A	#N/A	#N/A	#N/A	#N/A	0.00261789	2.39999e-08	Testosterone levels	TRUE	reported	h2pHMv	textfile	2	TRUE
8	rs11031005	C	T	C	T	0.0229697	-0.0081	0.143658	0.1663	FALSE	FALSE	FALSE	finn-b-NAFLD	11	30226356	0.0641	#N/A	0.8993	Nonalcoholic fatty liver disease || id:finn-b-NAFLD	Nonalcoholic fatty liver disease	Nonalcoholic fatty liver disease || ||	TRUE	igd	#N/A	#N/A	#N/A	#N/A	#N/A	#N/A	#N/A	0.00362517	1.5e-10	Testosterone levels	TRUE	reported	h2pHMv	textfile	2	TRUE
9	rs1119208	T	C	T	C	-0.0174527	0.0478	0.351378	0.433	FALSE	FALSE	FALSE	finn-b-NAFLD	5	76488613	0.0484	#N/A	0.3227	Nonalcoholic fatty liver disease || id:finn-b-NAFLD	Nonalcoholic fatty liver disease	Nonalcoholic fatty liver disease || ||	TRUE	igd	#N/A	#N/A	#N/A	#N/A	#N/A	#N/A	#N/A	0.00265984	1.20005e-11	Testosterone levels	TRUE	reported	h2pHMv	textfile	2	TRUE
10	rs11235688	A	G	A	G	-0.0164676	0.0524	0.416937	0.4189	FALSE	FALSE	FALSE	finn-b-NAFLD	11	72947934	0.0487	#N/A	0.2818	Nonalcoholic fatty liver disease || id:finn-b-NAFLD	Nonalcoholic fatty liver disease	Nonalcoholic fatty liver disease || ||	TRUE	igd	#N/A	#N/A	#N/A	#N/A	#N/A	#N/A	#N/A	0.00257775	7.00003e-12	Testosterone levels	TRUE	reported	h2pHMv	textfile	2	TRUE
11	rs112635299	T	G	T	G	-0.102348	0.2111	0.020967	0.02	FALSE	FALSE	FALSE	finn-b-NAFLD	14	94838142	0.1707	#N/A	0.2161	Nonalcoholic fatty liver disease || id:finn-b-NAFLD	Nonalcoholic fatty liver disease	Nonalcoholic fatty liver disease || ||	TRUE	igd	#N/A	#N/A	#N/A	#N/A	#N/A	#N/A	#N/A	0.0088592	1.10002e-31	Testosterone levels	TRUE	reported	h2pHMv	textfile	2	TRUE
12	rs113172275	C	T	C	T	0.0491508	0.0124	0.066134	0.03145	FALSE	FALSE	FALSE	finn-b-NAFLD	11	62905115	0.1375	#N/A	0.9282	Nonalcoholic fatty liver disease || id:finn-b-NAFLD	Nonalcoholic fatty liver disease	Nonalcoholic fatty liver disease || ||	TRUE	igd	#N/A	#N/A	#N/A	#N/A	#N/A	#N/A	#N/A	0.00511463	1.39991e-22	Testosterone levels	TRUE	reported	h2pHMv	textfile	2	TRUE
13	rs113347955	A	G	A	G	-0.0445837	-0.0544	0.023995	0.01559	FALSE	FALSE	FALSE	finn-b-NAFLD	8	97144471	0.1928	#N/A	0.7776	Nonalcoholic fatty liver disease || id:finn-b-NAFLD	Nonalcoholic fatty liver disease	Nonalcoholic fatty liver disease || ||	TRUE	igd	TRUE	rs113347955	rs79545674	A	G	A	C	0.00835395	1.2e-08	Testosterone levels	TRUE	reported	h2pHMv	textfile	2	TRUE
14	rs114165349	C	G	C	G	0.0930986	0.0474	0.023696	0.03745	FALSE	TRUE	FALSE	finn-b-NAFLD	1	27021913	0.127	#N/A	0.7089	Nonalcoholic fatty liver disease || id:finn-b-NAFLD	Nonalcoholic fatty liver disease	Nonalcoholic fatty liver disease || ||	TRUE	igd	#N/A	#N/A	#N/A	#N/A	#N/A	#N/A	#N/A	0.008356	3.80014e-28	Testosterone levels	TRUE	reported	h2pHMv	textfile	2	TRUE
15	rs11606014	T	C	T	C	-0.0180249	-0.0112	0.166368	0.1612	FALSE	FALSE	FALSE	finn-b-NAFLD	11	64041817	0.0649	#N/A	0.8635	Nonalcoholic fatty liver disease || id:finn-b-NAFLD	Nonalcoholic fatty liver disease	Nonalcoholic fatty liver disease || ||	TRUE	igd	#N/A	#N/A	#N/A	#N/A	#N/A	#N/A	#N/A	0.00340084	2.5e-08	Testosterone levels	TRUE	reported	h2pHMv	textfile	2	TRUE
16	rs11621792	T	C	T	C	0.0245363	0.0599	0.452392	0.3685	FALSE	FALSE	FALSE	finn-b-NAFLD	14	24871926	0.0496	#N/A	0.2273	Nonalcoholic fatty liver disease || id:finn-b-NAFLD	Nonalcoholic fatty liver disease	Nonalcoholic fatty liver disease || ||	TRUE	igd	#N/A	#N/A	#N/A	#N/A	#N/A	#N/A	#N/A	0.00256772	1.39991e-22	Testosterone levels	TRUE	reported	h2pHMv	textfile	2	TRUE
17	rs11653686	T	C	T	C	-0.0656834	-0.1112	0.086795	0.03629	FALSE	FALSE	FALSE	finn-b-NAFLD	17	47362991	0.128	#N/A	0.385	Nonalcoholic fatty liver disease || id:finn-b-NAFLD	Nonalcoholic fatty liver disease	Nonalcoholic fatty liver disease || ||	TRUE	igd	#N/A	#N/A	#N/A	#N/A	#N/A	#N/A	#N/A	0.0044863	8.30042e-48	Testosterone levels	TRUE	reported	h2pHMv	textfile	2	TRUE
18	rs11683361	G	C	G	C	0.0222847	0.0651	0.806537	0.7751	FALSE	TRUE	FALSE	finn-b-NAFLD	2	112380559	0.0574	#N/A	0.2564	Nonalcoholic fatty liver disease || id:finn-b-NAFLD	Nonalcoholic fatty liver disease	Nonalcoholic fatty liver disease || ||	TRUE	igd	#N/A	#N/A	#N/A	#N/A	#N/A	#N/A	#N/A	0.00320442	2.09991e-12	Testosterone levels	TRUE	reported	h2pHMv	textfile	2	TRUE
19	rs117005276	A	G	A	G	0.031136	0.102	0.060396	0.03536	FALSE	FALSE	FALSE	finn-b-NAFLD	10	5259361	0.1296	#N/A	0.431	Nonalcoholic fatty liver disease || id:finn-b-NAFLD	Nonalcoholic fatty liver disease	Nonalcoholic fatty liver disease || ||	TRUE	igd	#N/A	#N/A	#N/A	#N/A	#N/A	#N/A	#N/A	0.00534264	5.80003e-09	Testosterone levels	TRUE	reported	h2pHMv	textfile	2	TRUE
20	rs117327231	A	C	A	C	0.0971595	0.0353	0.022901	0.002758	FALSE	FALSE	FALSE	finn-b-NAFLD	18	71916636	0.4602	#N/A	0.9388	Nonalcoholic fatty liver disease || id:finn-b-NAFLD	Nonalcoholic fatty liver disease	Nonalcoholic fatty liver disease || ||	TRUE	igd	#N/A	#N/A	#N/A	#N/A	#N/A	#N/A	#N/A	0.00847888	2.80027e-31	Testosterone levels	TRUE	reported	h2pHMv	textfile	2	TRUE
21	rs11784903	C	T	C	T	0.0135555	-0.0929	0.52578	0.4908	FALSE	FALSE	FALSE	finn-b-NAFLD	8	116979531	0.048	#N/A	0.0530005	Nonalcoholic fatty liver disease || id:finn-b-NAFLD	Nonalcoholic fatty liver disease	Nonalcoholic fatty liver disease || ||	TRUE	igd	#N/A	#N/A	#N/A	#N/A	#N/A	#N/A	#N/A	0.00254887	3.59998e-08	Testosterone levels	TRUE	reported	h2pHMv	textfile	2	TRUE
22	rs11879227	G	A	G	A	-0.0200588	-0.1363	0.183083	0.2286	FALSE	FALSE	FALSE	finn-b-NAFLD	19	46193351	0.0572	#N/A	0.01711	Nonalcoholic fatty liver disease || id:finn-b-NAFLD	Nonalcoholic fatty liver disease	Nonalcoholic fatty liver disease || ||	TRUE	igd	#N/A	#N/A	#N/A	#N/A	#N/A	#N/A	#N/A	0.00327867	1e-09	Testosterone levels	TRUE	reported	h2pHMv	textfile	2	TRUE
23	rs12078363	C	T	C	T	-0.0153477	0.0152	0.318817	0.3324	FALSE	FALSE	FALSE	finn-b-NAFLD	1	218537310	0.0509	#N/A	0.7652	Nonalcoholic fatty liver disease || id:finn-b-NAFLD	Nonalcoholic fatty liver disease	Nonalcoholic fatty liver disease || ||	TRUE	igd	#N/A	#N/A	#N/A	#N/A	#N/A	#N/A	#N/A	0.00271563	4.49997e-09	Testosterone levels	TRUE	reported	h2pHMv	textfile	2	TRUE
24	rs12135478	G	A	G	A	0.0150944	-0.0703	0.331026	0.3529	FALSE	FALSE	FALSE	finn-b-NAFLD	1	39539043	0.0503	#N/A	0.1629	Nonalcoholic fatty liver disease || id:finn-b-NAFLD	Nonalcoholic fatty liver disease	Nonalcoholic fatty liver disease || ||	TRUE	igd	#N/A	#N/A	#N/A	#N/A	#N/A	#N/A	#N/A	0.00270716	8.79995e-09	Testosterone levels	TRUE	reported	h2pHMv	textfile	2	TRUE
25	rs1214759	G	A	G	A	0.018082	0.0751	0.678718	0.6952	FALSE	FALSE	FALSE	finn-b-NAFLD	6	43352980	0.0519	#N/A	0.148	Nonalcoholic fatty liver disease || id:finn-b-NAFLD	Nonalcoholic fatty liver disease	Nonalcoholic fatty liver disease || ||	TRUE	igd	#N/A	#N/A	#N/A	#N/A	#N/A	#N/A	#N/A	0.00271377	2.80027e-12	Testosterone levels	TRUE	reported	h2pHMv	textfile	2	TRUE
26	rs12189146	A	G	A	G	-0.0320071	-0.0581	0.050112	0.09165	FALSE	FALSE	FALSE	finn-b-NAFLD	5	35239886	0.0836	#N/A	0.4872	Nonalcoholic fatty liver disease || id:finn-b-NAFLD	Nonalcoholic fatty liver disease	Nonalcoholic fatty liver disease || ||	TRUE	igd	#N/A	#N/A	#N/A	#N/A	#N/A	#N/A	#N/A	0.00579861	1.79999e-08	Testosterone levels	TRUE	reported	h2pHMv	textfile	2	TRUE
27	rs12543598	G	T	G	T	-0.0199058	-0.0196	0.554213	0.6176	FALSE	FALSE	FALSE	finn-b-NAFLD	8	143955318	0.0492	#N/A	0.6903	Nonalcoholic fatty liver disease || id:finn-b-NAFLD	Nonalcoholic fatty liver disease	Nonalcoholic fatty liver disease || ||	TRUE	igd	#N/A	#N/A	#N/A	#N/A	#N/A	#N/A	#N/A	0.0025457	6.59933e-15	Testosterone levels	TRUE	reported	h2pHMv	textfile	2	TRUE
28	rs12564492	A	G	A	G	0.0153482	0.0253	0.703211	0.6668	FALSE	FALSE	FALSE	finn-b-NAFLD	1	168234645	0.0507	#N/A	0.617999	Nonalcoholic fatty liver disease || id:finn-b-NAFLD	Nonalcoholic fatty liver disease	Nonalcoholic fatty liver disease || ||	TRUE	igd	#N/A	#N/A	#N/A	#N/A	#N/A	#N/A	#N/A	0.00276579	5e-09	Testosterone levels	TRUE	reported	h2pHMv	textfile	2	TRUE
29	rs12645584	T	C	T	C	0.0169337	0.0907	0.731368	0.6662	FALSE	FALSE	FALSE	finn-b-NAFLD	4	17919066	0.0509	#N/A	0.0748893	Nonalcoholic fatty liver disease || id:finn-b-NAFLD	Nonalcoholic fatty liver disease	Nonalcoholic fatty liver disease || ||	TRUE	igd	#N/A	#N/A	#N/A	#N/A	#N/A	#N/A	#N/A	0.00285943	3.89996e-09	Testosterone levels	TRUE	reported	h2pHMv	textfile	2	TRUE
30	rs12658172	C	G	C	G	-0.0303213	0.0767	0.15819	0.154	FALSE	TRUE	FALSE	finn-b-NAFLD	5	124205385	0.0666	#N/A	0.2492	Nonalcoholic fatty liver disease || id:finn-b-NAFLD	Nonalcoholic fatty liver disease	Nonalcoholic fatty liver disease || ||	TRUE	igd	#N/A	#N/A	#N/A	#N/A	#N/A	#N/A	#N/A	0.00351809	1.80011e-18	Testosterone levels	TRUE	reported	h2pHMv	textfile	2	TRUE
31	rs12683780	C	A	C	A	-0.0179481	-0.0132	0.331384	0.3793	FALSE	FALSE	FALSE	finn-b-NAFLD	9	16252807	0.0498	#N/A	0.790901	Nonalcoholic fatty liver disease || id:finn-b-NAFLD	Nonalcoholic fatty liver disease	Nonalcoholic fatty liver disease || ||	TRUE	igd	#N/A	#N/A	#N/A	#N/A	#N/A	#N/A	#N/A	0.00276798	4.70002e-12	Testosterone levels	TRUE	reported	h2pHMv	textfile	2	TRUE
32	rs12797706	A	G	A	G	-0.0196809	-0.0297	0.234509	0.2146	FALSE	FALSE	FALSE	finn-b-NAFLD	11	65561369	0.0583	#N/A	0.6096	Nonalcoholic fatty liver disease || id:finn-b-NAFLD	Nonalcoholic fatty liver disease	Nonalcoholic fatty liver disease || ||	TRUE	igd	#N/A	#N/A	#N/A	#N/A	#N/A	#N/A	#N/A	0.00301192	6.4998e-11	Testosterone levels	TRUE	reported	h2pHMv	textfile	2	TRUE
33	rs12999558	A	G	A	G	0.0334476	-0.0576	0.051298	0.1162	FALSE	FALSE	FALSE	finn-b-NAFLD	2	12553355	0.0755	#N/A	0.4458	Nonalcoholic fatty liver disease || id:finn-b-NAFLD	Nonalcoholic fatty liver disease	Nonalcoholic fatty liver disease || ||	TRUE	igd	#N/A	#N/A	#N/A	#N/A	#N/A	#N/A	#N/A	0.00573539	3.09999e-10	Testosterone levels	TRUE	reported	h2pHMv	textfile	2	TRUE
34	rs13030651	A	G	A	G	-0.0165893	-0.0727	0.551168	0.5847	FALSE	FALSE	FALSE	finn-b-NAFLD	2	43508205	0.0488	#N/A	0.1361	Nonalcoholic fatty liver disease || id:finn-b-NAFLD	Nonalcoholic fatty liver disease	Nonalcoholic fatty liver disease || ||	TRUE	igd	#N/A	#N/A	#N/A	#N/A	#N/A	#N/A	#N/A	0.00254677	7.00003e-12	Testosterone levels	TRUE	reported	h2pHMv	textfile	2	TRUE
35	rs13153019	C	T	C	T	0.0177496	0.023	0.249291	0.2709	FALSE	FALSE	FALSE	finn-b-NAFLD	5	176782218	0.0538	#N/A	0.6693	Nonalcoholic fatty liver disease || id:finn-b-NAFLD	Nonalcoholic fatty liver disease	Nonalcoholic fatty liver disease || ||	TRUE	igd	#N/A	#N/A	#N/A	#N/A	#N/A	#N/A	#N/A	0.00294469	2.30001e-09	Testosterone levels	TRUE	reported	h2pHMv	textfile	2	TRUE
36	rs1432679	T	C	T	C	-0.0133517	0.0391	0.553533	0.5973	FALSE	FALSE	FALSE	finn-b-NAFLD	5	158244083	0.0487	#N/A	0.4222	Nonalcoholic fatty liver disease || id:finn-b-NAFLD	Nonalcoholic fatty liver disease	Nonalcoholic fatty liver disease || ||	TRUE	igd	#N/A	#N/A	#N/A	#N/A	#N/A	#N/A	#N/A	0.00254992	4.70002e-08	Testosterone levels	TRUE	reported	h2pHMv	textfile	2	TRUE
37	rs149619820	C	T	C	T	-0.0163221	0.008	0.239359	0.2526	FALSE	FALSE	FALSE	finn-b-NAFLD	16	88073841	0.055	#N/A	0.8843	Nonalcoholic fatty liver disease || id:finn-b-NAFLD	Nonalcoholic fatty liver disease	Nonalcoholic fatty liver disease || ||	TRUE	igd	TRUE	rs149619820	rs72818533	C	T	A	G	0.0029939	4.39997e-08	Testosterone levels	TRUE	reported	h2pHMv	textfile	2	TRUE
38	rs1498707	A	G	A	G	0.0161201	-0.0231	0.264966	0.2775	FALSE	FALSE	FALSE	finn-b-NAFLD	12	93997128	0.0534	#N/A	0.6651	Nonalcoholic fatty liver disease || id:finn-b-NAFLD	Nonalcoholic fatty liver disease	Nonalcoholic fatty liver disease || ||	TRUE	igd	#N/A	#N/A	#N/A	#N/A	#N/A	#N/A	#N/A	0.0028671	1.29999e-08	Testosterone levels	TRUE	reported	h2pHMv	textfile	2	TRUE
39	rs1640272	T	A	T	A	-0.0211934	-0.0102	0.287154	0.3067	FALSE	TRUE	FALSE	finn-b-NAFLD	19	2800192	0.0518	#N/A	0.8438	Nonalcoholic fatty liver disease || id:finn-b-NAFLD	Nonalcoholic fatty liver disease	Nonalcoholic fatty liver disease || ||	TRUE	igd	#N/A	#N/A	#N/A	#N/A	#N/A	#N/A	#N/A	0.00280641	3.69999e-14	Testosterone levels	TRUE	reported	h2pHMv	textfile	2	TRUE
40	rs168189	T	C	T	C	0.0202832	0.0448	0.279591	0.2827	FALSE	FALSE	FALSE	finn-b-NAFLD	5	77974427	0.0535	#N/A	0.4028	Nonalcoholic fatty liver disease || id:finn-b-NAFLD	Nonalcoholic fatty liver disease	Nonalcoholic fatty liver disease || ||	TRUE	igd	#N/A	#N/A	#N/A	#N/A	#N/A	#N/A	#N/A	0.00283846	5.40008e-13	Testosterone levels	TRUE	reported	h2pHMv	textfile	2	TRUE
41	rs1688043	T	C	T	C	-0.0406564	-0.0614	0.933737	0.9374	FALSE	FALSE	FALSE	finn-b-NAFLD	19	35553341	0.0984	#N/A	0.5327	Nonalcoholic fatty liver disease || id:finn-b-NAFLD	Nonalcoholic fatty liver disease	Nonalcoholic fatty liver disease || ||	TRUE	igd	#N/A	#N/A	#N/A	#N/A	#N/A	#N/A	#N/A	0.0050991	1.9002e-16	Testosterone levels	TRUE	reported	h2pHMv	textfile	2	TRUE
42	rs17245822	C	A	C	A	0.013936	0.0043	0.373082	0.3933	FALSE	FALSE	FALSE	finn-b-NAFLD	13	73131694	0.0489	#N/A	0.9293	Nonalcoholic fatty liver disease || id:finn-b-NAFLD	Nonalcoholic fatty liver disease	Nonalcoholic fatty liver disease || ||	TRUE	igd	#N/A	#N/A	#N/A	#N/A	#N/A	#N/A	#N/A	0.00264789	3.59998e-08	Testosterone levels	TRUE	reported	h2pHMv	textfile	2	TRUE
43	rs17287714	C	T	C	T	-0.0220873	0.075	0.118115	0.1105	FALSE	FALSE	FALSE	finn-b-NAFLD	4	159871166	0.0764	#N/A	0.3267	Nonalcoholic fatty liver disease || id:finn-b-NAFLD	Nonalcoholic fatty liver disease	Nonalcoholic fatty liver disease || ||	TRUE	igd	#N/A	#N/A	#N/A	#N/A	#N/A	#N/A	#N/A	0.00395912	3.69999e-08	Testosterone levels	TRUE	reported	h2pHMv	textfile	2	TRUE
44	rs17580	A	T	A	T	-0.0401832	0.3386	0.047972	0.009198	FALSE	TRUE	FALSE	finn-b-NAFLD	14	94847262	0.2484	#N/A	0.1729	Nonalcoholic fatty liver disease || id:finn-b-NAFLD	Nonalcoholic fatty liver disease	Nonalcoholic fatty liver disease || ||	TRUE	igd	#N/A	#N/A	#N/A	#N/A	#N/A	#N/A	#N/A	0.00593725	6.89922e-12	Testosterone levels	TRUE	reported	h2pHMv	textfile	2	TRUE
45	rs17677724	T	C	T	C	-0.0198927	0.0402	0.165682	0.1214	FALSE	FALSE	FALSE	finn-b-NAFLD	5	128015370	0.0734	#N/A	0.5841	Nonalcoholic fatty liver disease || id:finn-b-NAFLD	Nonalcoholic fatty liver disease	Nonalcoholic fatty liver disease || ||	TRUE	igd	#N/A	#N/A	#N/A	#N/A	#N/A	#N/A	#N/A	0.00342663	7.19996e-09	Testosterone levels	TRUE	reported	h2pHMv	textfile	2	TRUE
46	rs17842959	T	A	T	A	0.0151536	0.097	0.234538	0.1266	FALSE	TRUE	FALSE	finn-b-NAFLD	12	103368889	0.0722	#N/A	0.179	Nonalcoholic fatty liver disease || id:finn-b-NAFLD	Nonalcoholic fatty liver disease	Nonalcoholic fatty liver disease || ||	TRUE	igd	#N/A	#N/A	#N/A	#N/A	#N/A	#N/A	#N/A	0.00300428	3.09999e-08	Testosterone levels	TRUE	reported	h2pHMv	textfile	2	TRUE
47	rs1934923	C	T	C	T	0.0394584	0.0098	0.779323	0.8348	FALSE	FALSE	FALSE	finn-b-NAFLD	6	119171412	0.0645	#N/A	0.879	Nonalcoholic fatty liver disease || id:finn-b-NAFLD	Nonalcoholic fatty liver disease	Nonalcoholic fatty liver disease || ||	TRUE	igd	#N/A	#N/A	#N/A	#N/A	#N/A	#N/A	#N/A	0.00305768	1.9002e-39	Testosterone levels	TRUE	reported	h2pHMv	textfile	2	TRUE
48	rs1989147	T	C	T	C	-0.0235512	-0.1428	0.193209	0.2341	FALSE	FALSE	FALSE	finn-b-NAFLD	1	7909373	0.0567	#N/A	0.01181	Nonalcoholic fatty liver disease || id:finn-b-NAFLD	Nonalcoholic fatty liver disease	Nonalcoholic fatty liver disease || ||	TRUE	igd	#N/A	#N/A	#N/A	#N/A	#N/A	#N/A	#N/A	0.00322554	7.00003e-14	Testosterone levels	TRUE	reported	h2pHMv	textfile	2	TRUE
49	rs201643157	T	C	T	C	0.0169862	-0.0189	0.250805	0.266	FALSE	FALSE	FALSE	finn-b-NAFLD	8	23400143	0.0542	#N/A	0.727601	Nonalcoholic fatty liver disease || id:finn-b-NAFLD	Nonalcoholic fatty liver disease	Nonalcoholic fatty liver disease || ||	TRUE	igd	TRUE	rs201643157	rs4872147	T	C	T	C	0.0029338	8.30004e-10	Testosterone levels	TRUE	reported	h2pHMv	textfile	2	TRUE
50	rs202200760	C	G	C	G	-0.0627387	0.0289	0.039046	0.05589	FALSE	TRUE	FALSE	finn-b-NAFLD	19	17346854	0.1039	#N/A	0.781	Nonalcoholic fatty liver disease || id:finn-b-NAFLD	Nonalcoholic fatty liver disease	Nonalcoholic fatty liver disease || ||	TRUE	igd	#N/A	#N/A	#N/A	#N/A	#N/A	#N/A	#N/A	0.00714312	2.29985e-19	Testosterone levels	TRUE	reported	h2pHMv	textfile	2	TRUE
51	rs2152318	T	C	T	C	0.0317947	0.0138	0.244706	0.266	FALSE	FALSE	FALSE	finn-b-NAFLD	1	179293511	0.054	#N/A	0.7981	Nonalcoholic fatty liver disease || id:finn-b-NAFLD	Nonalcoholic fatty liver disease	Nonalcoholic fatty liver disease || ||	TRUE	igd	#N/A	#N/A	#N/A	#N/A	#N/A	#N/A	#N/A	0.00293732	1.80011e-27	Testosterone levels	TRUE	reported	h2pHMv	textfile	2	TRUE
52	rs2266782	A	G	A	G	0.0161462	-0.0645	0.41682	0.4508	FALSE	FALSE	FALSE	finn-b-NAFLD	1	171076966	0.048	#N/A	0.1787	Nonalcoholic fatty liver disease || id:finn-b-NAFLD	Nonalcoholic fatty liver disease	Nonalcoholic fatty liver disease || ||	TRUE	igd	#N/A	#N/A	#N/A	#N/A	#N/A	#N/A	#N/A	0.00255834	2.60016e-11	Testosterone levels	TRUE	reported	h2pHMv	textfile	2	TRUE
53	rs232089	G	A	G	A	-0.014596	0.0764	0.563497	0.4769	FALSE	FALSE	FALSE	finn-b-NAFLD	17	63733729	0.0478	#N/A	0.1101	Nonalcoholic fatty liver disease || id:finn-b-NAFLD	Nonalcoholic fatty liver disease	Nonalcoholic fatty liver disease || ||	TRUE	igd	#N/A	#N/A	#N/A	#N/A	#N/A	#N/A	#N/A	0.00255147	1.79999e-08	Testosterone levels	TRUE	reported	h2pHMv	textfile	2	TRUE
54	rs2397112	G	A	G	A	-0.0161299	0.0039	0.426209	0.4364	FALSE	FALSE	FALSE	finn-b-NAFLD	6	52684333	0.0482	#N/A	0.9356	Nonalcoholic fatty liver disease || id:finn-b-NAFLD	Nonalcoholic fatty liver disease	Nonalcoholic fatty liver disease || ||	TRUE	igd	#N/A	#N/A	#N/A	#N/A	#N/A	#N/A	#N/A	0.00256406	4e-10	Testosterone levels	TRUE	reported	h2pHMv	textfile	2	TRUE
55	rs2587507	C	T	C	T	0.0144984	-0.0449	0.506658	0.5125	FALSE	FALSE	FALSE	finn-b-NAFLD	17	77790135	0.0479	#N/A	0.3484	Nonalcoholic fatty liver disease || id:finn-b-NAFLD	Nonalcoholic fatty liver disease	Nonalcoholic fatty liver disease || ||	TRUE	igd	#N/A	#N/A	#N/A	#N/A	#N/A	#N/A	#N/A	0.00250708	9.59997e-09	Testosterone levels	TRUE	reported	h2pHMv	textfile	2	TRUE
56	rs2602533	A	C	A	C	-0.0144259	0.0118	0.583183	0.6153	FALSE	FALSE	FALSE	finn-b-NAFLD	2	178167965	0.0495	#N/A	0.8108	Nonalcoholic fatty liver disease || id:finn-b-NAFLD	Nonalcoholic fatty liver disease	Nonalcoholic fatty liver disease || ||	TRUE	igd	#N/A	#N/A	#N/A	#N/A	#N/A	#N/A	#N/A	0.00256654	1.29999e-09	Testosterone levels	TRUE	reported	h2pHMv	textfile	2	TRUE
57	rs272607	G	T	G	T	-0.0218401	0.0699	0.288392	0.248	FALSE	FALSE	FALSE	finn-b-NAFLD	8	81424801	0.0555	#N/A	0.2081	Nonalcoholic fatty liver disease || id:finn-b-NAFLD	Nonalcoholic fatty liver disease	Nonalcoholic fatty liver disease || ||	TRUE	igd	#N/A	#N/A	#N/A	#N/A	#N/A	#N/A	#N/A	0.00279723	3.80014e-16	Testosterone levels	TRUE	reported	h2pHMv	textfile	2	TRUE
58	rs2727099	T	C	T	C	-0.0145707	0.0127	0.427066	0.4505	FALSE	FALSE	FALSE	finn-b-NAFLD	15	66063428	0.048	#N/A	0.7913	Nonalcoholic fatty liver disease || id:finn-b-NAFLD	Nonalcoholic fatty liver disease	Nonalcoholic fatty liver disease || ||	TRUE	igd	#N/A	#N/A	#N/A	#N/A	#N/A	#N/A	#N/A	0.00255862	8.10009e-09	Testosterone levels	TRUE	reported	h2pHMv	textfile	2	TRUE
59	rs28641793	A	C	A	C	0.0840715	0.3066	0.011961	0.002068	FALSE	FALSE	FALSE	finn-b-NAFLD	6	31974355	0.5148	#N/A	0.551501	Nonalcoholic fatty liver disease || id:finn-b-NAFLD	Nonalcoholic fatty liver disease	Nonalcoholic fatty liver disease || ||	TRUE	igd	#N/A	#N/A	#N/A	#N/A	#N/A	#N/A	#N/A	0.0118238	6.20012e-14	Testosterone levels	TRUE	reported	h2pHMv	textfile	2	TRUE
60	rs295289	A	T	A	T	-0.0286651	-0.0744	0.256477	0.255	FALSE	TRUE	FALSE	finn-b-NAFLD	9	86559104	0.0549	#N/A	0.1749	Nonalcoholic fatty liver disease || id:finn-b-NAFLD	Nonalcoholic fatty liver disease	Nonalcoholic fatty liver disease || ||	TRUE	igd	TRUE	rs295289	rs4147133	A	T	T	C	0.00291008	1.20005e-23	Testosterone levels	TRUE	reported	h2pHMv	textfile	2	TRUE
61	rs2954111	C	T	C	T	0.0166682	0.0444	0.36145	0.3365	FALSE	FALSE	FALSE	finn-b-NAFLD	12	122134415	0.0511	#N/A	0.385	Nonalcoholic fatty liver disease || id:finn-b-NAFLD	Nonalcoholic fatty liver disease	Nonalcoholic fatty liver disease || ||	TRUE	igd	#N/A	#N/A	#N/A	#N/A	#N/A	#N/A	#N/A	0.00263676	3.09999e-10	Testosterone levels	TRUE	reported	h2pHMv	textfile	2	TRUE
62	rs34156023	TC	T	TC	T	0.0134076	0.0431	0.432121	0.544	FALSE	FALSE	FALSE	finn-b-NAFLD	9	114646556	0.0482	#N/A	0.3716	Nonalcoholic fatty liver disease || id:finn-b-NAFLD	Nonalcoholic fatty liver disease	Nonalcoholic fatty liver disease || ||	TRUE	igd	#N/A	#N/A	#N/A	#N/A	#N/A	#N/A	#N/A	0.00257155	1.29999e-08	Testosterone levels	TRUE	reported	h2pHMv	textfile	2	TRUE
63	rs34544502	A	G	A	G	0.0350866	0.1102	0.041477	0.01604	FALSE	FALSE	FALSE	finn-b-NAFLD	12	24246016	0.1896	#N/A	0.561	Nonalcoholic fatty liver disease || id:finn-b-NAFLD	Nonalcoholic fatty liver disease	Nonalcoholic fatty liver disease || ||	TRUE	igd	TRUE	rs34544502	rs75342935	A	G	T	C	0.00636329	2.19999e-08	Testosterone levels	TRUE	reported	h2pHMv	textfile	2	TRUE
64	rs34872892	G	A	G	A	-0.0219895	-0.056	0.208489	0.2298	FALSE	FALSE	FALSE	finn-b-NAFLD	4	69339257	0.0569	#N/A	0.3247	Nonalcoholic fatty liver disease || id:finn-b-NAFLD	Nonalcoholic fatty liver disease	Nonalcoholic fatty liver disease || ||	TRUE	igd	#N/A	#N/A	#N/A	#N/A	#N/A	#N/A	#N/A	0.00314374	1.50003e-12	Testosterone levels	TRUE	reported	h2pHMv	textfile	2	TRUE
65	rs34880700	A	G	A	G	0.0212685	-0.0244	0.137269	0.1486	FALSE	FALSE	FALSE	finn-b-NAFLD	6	41681036	0.0673	#N/A	0.7175	Nonalcoholic fatty liver disease || id:finn-b-NAFLD	Nonalcoholic fatty liver disease	Nonalcoholic fatty liver disease || ||	TRUE	igd	#N/A	#N/A	#N/A	#N/A	#N/A	#N/A	#N/A	0.00368018	6.1e-09	Testosterone levels	TRUE	reported	h2pHMv	textfile	2	TRUE
66	rs34931250	T	C	T	C	-0.0399468	-0.0393	0.060756	0.06623	FALSE	FALSE	FALSE	finn-b-NAFLD	17	66879927	0.0973	#N/A	0.6866	Nonalcoholic fatty liver disease || id:finn-b-NAFLD	Nonalcoholic fatty liver disease	Nonalcoholic fatty liver disease || ||	TRUE	igd	#N/A	#N/A	#N/A	#N/A	#N/A	#N/A	#N/A	0.00528569	3.10027e-15	Testosterone levels	TRUE	reported	h2pHMv	textfile	2	TRUE
67	rs351370	T	C	T	C	0.0162176	0.0253	0.586551	0.6043	FALSE	FALSE	FALSE	finn-b-NAFLD	1	113054659	0.049	#N/A	0.6052	Nonalcoholic fatty liver disease || id:finn-b-NAFLD	Nonalcoholic fatty liver disease	Nonalcoholic fatty liver disease || ||	TRUE	igd	#N/A	#N/A	#N/A	#N/A	#N/A	#N/A	#N/A	0.00256394	1.5e-10	Testosterone levels	TRUE	reported	h2pHMv	textfile	2	TRUE
68	rs35783704	A	G	A	G	0.0326591	-0.1515	0.101475	0.1562	FALSE	FALSE	FALSE	finn-b-NAFLD	8	105966258	0.0663	#N/A	0.02238	Nonalcoholic fatty liver disease || id:finn-b-NAFLD	Nonalcoholic fatty liver disease	Nonalcoholic fatty liver disease || ||	TRUE	igd	#N/A	#N/A	#N/A	#N/A	#N/A	#N/A	#N/A	0.00424371	4.70002e-16	Testosterone levels	TRUE	reported	h2pHMv	textfile	2	TRUE
69	rs36019311	GTA	G	GTA	G	0.028839	0.0302	0.129566	0.1286	FALSE	FALSE	FALSE	finn-b-NAFLD	7	73051990	0.0714	#N/A	0.6724	Nonalcoholic fatty liver disease || id:finn-b-NAFLD	Nonalcoholic fatty liver disease	Nonalcoholic fatty liver disease || ||	TRUE	igd	#N/A	#N/A	#N/A	#N/A	#N/A	#N/A	#N/A	0.00378589	3.10027e-14	Testosterone levels	TRUE	reported	h2pHMv	textfile	2	TRUE
70	rs3732218	A	G	A	G	-0.0252069	-0.0537	0.081646	0.06895	FALSE	FALSE	FALSE	finn-b-NAFLD	2	234627304	0.0939	#N/A	0.5672	Nonalcoholic fatty liver disease || id:finn-b-NAFLD	Nonalcoholic fatty liver disease	Nonalcoholic fatty liver disease || ||	TRUE	igd	#N/A	#N/A	#N/A	#N/A	#N/A	#N/A	#N/A	0.00461852	3.09999e-08	Testosterone levels	TRUE	reported	h2pHMv	textfile	2	TRUE
71	rs3766922	G	T	G	T	-0.014617	-0.0244	0.476517	0.4608	FALSE	FALSE	FALSE	finn-b-NAFLD	1	154577055	0.048	#N/A	0.611299	Nonalcoholic fatty liver disease || id:finn-b-NAFLD	Nonalcoholic fatty liver disease	Nonalcoholic fatty liver disease || ||	TRUE	igd	#N/A	#N/A	#N/A	#N/A	#N/A	#N/A	#N/A	0.00252592	2.80001e-08	Testosterone levels	TRUE	reported	h2pHMv	textfile	2	TRUE
72	rs3836123	GC	G	GC	G	0.0219001	0.0002	0.377694	0.2693	FALSE	FALSE	FALSE	finn-b-NAFLD	2	20411862	0.0539	#N/A	0.9967	Nonalcoholic fatty liver disease || id:finn-b-NAFLD	Nonalcoholic fatty liver disease	Nonalcoholic fatty liver disease || ||	TRUE	igd	#N/A	#N/A	#N/A	#N/A	#N/A	#N/A	#N/A	0.00261716	1.9002e-18	Testosterone levels	TRUE	reported	h2pHMv	textfile	2	TRUE
73	rs388430	T	C	T	C	-0.0167293	-0.017	0.316807	0.3448	FALSE	FALSE	FALSE	finn-b-NAFLD	16	4135562	0.0504	#N/A	0.7357	Nonalcoholic fatty liver disease || id:finn-b-NAFLD	Nonalcoholic fatty liver disease	Nonalcoholic fatty liver disease || ||	TRUE	igd	#N/A	#N/A	#N/A	#N/A	#N/A	#N/A	#N/A	0.00271149	2.59998e-10	Testosterone levels	TRUE	reported	h2pHMv	textfile	2	TRUE
74	rs40270	C	A	C	A	0.0189592	0.0333	0.773334	0.7065	FALSE	FALSE	FALSE	finn-b-NAFLD	5	55804552	0.0525	#N/A	0.5264	Nonalcoholic fatty liver disease || id:finn-b-NAFLD	Nonalcoholic fatty liver disease	Nonalcoholic fatty liver disease || ||	TRUE	igd	#N/A	#N/A	#N/A	#N/A	#N/A	#N/A	#N/A	0.00301788	4e-10	Testosterone levels	TRUE	reported	h2pHMv	textfile	2	TRUE
75	rs41301394	T	C	T	C	0.0182629	0.0692	0.2821	0.3873	FALSE	FALSE	FALSE	finn-b-NAFLD	7	75612803	0.0491	#N/A	0.1585	Nonalcoholic fatty liver disease || id:finn-b-NAFLD	Nonalcoholic fatty liver disease	Nonalcoholic fatty liver disease || ||	TRUE	igd	#N/A	#N/A	#N/A	#N/A	#N/A	#N/A	#N/A	0.00281468	4.00037e-11	Testosterone levels	TRUE	reported	h2pHMv	textfile	2	TRUE
76	rs4149056	C	T	C	T	0.0425623	0.0983	0.151223	0.2022	FALSE	FALSE	FALSE	finn-b-NAFLD	12	21331549	0.0597	#N/A	0.0996598	Nonalcoholic fatty liver disease || id:finn-b-NAFLD	Nonalcoholic fatty liver disease	Nonalcoholic fatty liver disease || ||	TRUE	igd	#N/A	#N/A	#N/A	#N/A	#N/A	#N/A	#N/A	0.00353694	2.99985e-35	Testosterone levels	TRUE	reported	h2pHMv	textfile	2	TRUE
77	rs4368453	T	C	T	C	0.0170734	0.0478	0.301677	0.2361	FALSE	FALSE	FALSE	finn-b-NAFLD	3	156852141	0.0564	#N/A	0.3967	Nonalcoholic fatty liver disease || id:finn-b-NAFLD	Nonalcoholic fatty liver disease	Nonalcoholic fatty liver disease || ||	TRUE	igd	#N/A	#N/A	#N/A	#N/A	#N/A	#N/A	#N/A	0.00278196	3.59998e-09	Testosterone levels	TRUE	reported	h2pHMv	textfile	2	TRUE
78	rs4506131	C	G	C	G	-0.0314239	0.0517	0.737286	0.7746	FALSE	TRUE	FALSE	finn-b-NAFLD	7	97913196	0.0574	#N/A	0.3672	Nonalcoholic fatty liver disease || id:finn-b-NAFLD	Nonalcoholic fatty liver disease	Nonalcoholic fatty liver disease || ||	TRUE	igd	#N/A	#N/A	#N/A	#N/A	#N/A	#N/A	#N/A	0.00287593	5.40008e-28	Testosterone levels	TRUE	reported	h2pHMv	textfile	2	TRUE
79	rs45446698	G	T	G	T	-0.161091	-0.0104	0.041922	0.05227	FALSE	FALSE	FALSE	finn-b-NAFLD	7	99332948	0.1078	#N/A	0.923	Nonalcoholic fatty liver disease || id:finn-b-NAFLD	Nonalcoholic fatty liver disease	Nonalcoholic fatty liver disease || ||	TRUE	igd	#N/A	#N/A	#N/A	#N/A	#N/A	#N/A	#N/A	0.00634011	5.1051e-148	Testosterone levels	TRUE	reported	h2pHMv	textfile	2	TRUE
80	rs4690098	T	C	T	C	0.0266003	-0.0148	0.235337	0.2628	FALSE	FALSE	FALSE	finn-b-NAFLD	4	3447156	0.0546	#N/A	0.786401	Nonalcoholic fatty liver disease || id:finn-b-NAFLD	Nonalcoholic fatty liver disease	Nonalcoholic fatty liver disease || ||	TRUE	igd	#N/A	#N/A	#N/A	#N/A	#N/A	#N/A	#N/A	0.00303968	4.00037e-18	Testosterone levels	TRUE	reported	h2pHMv	textfile	2	TRUE
81	rs4712976	T	C	T	C	-0.0186329	-0.0507	0.267558	0.3568	FALSE	FALSE	FALSE	finn-b-NAFLD	6	25842203	0.0503	#N/A	0.313	Nonalcoholic fatty liver disease || id:finn-b-NAFLD	Nonalcoholic fatty liver disease	Nonalcoholic fatty liver disease || ||	TRUE	igd	#N/A	#N/A	#N/A	#N/A	#N/A	#N/A	#N/A	0.00285866	3.29989e-11	Testosterone levels	TRUE	reported	h2pHMv	textfile	2	TRUE
82	rs4869893	C	A	C	A	0.0155066	-0.0095	0.281972	0.2702	FALSE	FALSE	FALSE	finn-b-NAFLD	6	157117322	0.0542	#N/A	0.8617	Nonalcoholic fatty liver disease || id:finn-b-NAFLD	Nonalcoholic fatty liver disease	Nonalcoholic fatty liver disease || ||	TRUE	igd	#N/A	#N/A	#N/A	#N/A	#N/A	#N/A	#N/A	0.00281531	1.09999e-08	Testosterone levels	TRUE	reported	h2pHMv	textfile	2	TRUE
83	rs55781920	C	T	C	T	0.0290889	-0.0808	0.111639	0.06055	FALSE	FALSE	FALSE	finn-b-NAFLD	15	53094677	0.1006	#N/A	0.4218	Nonalcoholic fatty liver disease || id:finn-b-NAFLD	Nonalcoholic fatty liver disease	Nonalcoholic fatty liver disease || ||	TRUE	igd	#N/A	#N/A	#N/A	#N/A	#N/A	#N/A	#N/A	0.00404125	2.39994e-13	Testosterone levels	TRUE	reported	h2pHMv	textfile	2	TRUE
84	rs56196860	A	C	A	C	-0.047541	0.4054	0.031447	0.01289	FALSE	FALSE	FALSE	finn-b-NAFLD	12	2908330	0.2184	#N/A	0.0634293	Nonalcoholic fatty liver disease || id:finn-b-NAFLD	Nonalcoholic fatty liver disease	Nonalcoholic fatty liver disease || ||	TRUE	igd	#N/A	#N/A	#N/A	#N/A	#N/A	#N/A	#N/A	0.00724504	1.40001e-10	Testosterone levels	TRUE	reported	h2pHMv	textfile	2	TRUE
85	rs56205943	A	G	A	G	-0.0209185	-0.0445	0.240996	0.2343	FALSE	FALSE	FALSE	finn-b-NAFLD	12	57679414	0.0564	#N/A	0.4303	Nonalcoholic fatty liver disease || id:finn-b-NAFLD	Nonalcoholic fatty liver disease	Nonalcoholic fatty liver disease || ||	TRUE	igd	#N/A	#N/A	#N/A	#N/A	#N/A	#N/A	#N/A	0.00295562	3.90032e-13	Testosterone levels	TRUE	reported	h2pHMv	textfile	2	TRUE
86	rs56332871	A	C	A	C	-0.0298823	0.0501	0.272157	0.2915	FALSE	FALSE	FALSE	finn-b-NAFLD	15	96714816	0.0529	#N/A	0.3441	Nonalcoholic fatty liver disease || id:finn-b-NAFLD	Nonalcoholic fatty liver disease	Nonalcoholic fatty liver disease || ||	TRUE	igd	#N/A	#N/A	#N/A	#N/A	#N/A	#N/A	#N/A	0.00285837	9.70063e-27	Testosterone levels	TRUE	reported	h2pHMv	textfile	2	TRUE
87	rs573833	C	T	C	T	-0.0148264	-0.0495	0.536938	0.5951	FALSE	FALSE	FALSE	finn-b-NAFLD	3	10534247	0.0488	#N/A	0.31	Nonalcoholic fatty liver disease || id:finn-b-NAFLD	Nonalcoholic fatty liver disease	Nonalcoholic fatty liver disease || ||	TRUE	igd	#N/A	#N/A	#N/A	#N/A	#N/A	#N/A	#N/A	0.0025392	4.79999e-09	Testosterone levels	TRUE	reported	h2pHMv	textfile	2	TRUE
88	rs58072681	C	T	C	T	0.0610878	-0.0651	0.070023	0.04368	FALSE	FALSE	FALSE	finn-b-NAFLD	16	81590541	0.1169	#N/A	0.577801	Nonalcoholic fatty liver disease || id:finn-b-NAFLD	Nonalcoholic fatty liver disease	Nonalcoholic fatty liver disease || ||	TRUE	igd	#N/A	#N/A	#N/A	#N/A	#N/A	#N/A	#N/A	0.00499767	8.30042e-36	Testosterone levels	TRUE	reported	h2pHMv	textfile	2	TRUE
89	rs590097	G	T	G	T	0.0339639	0.0152	0.646468	0.6155	FALSE	FALSE	FALSE	finn-b-NAFLD	2	111934107	0.0494	#N/A	0.757801	Nonalcoholic fatty liver disease || id:finn-b-NAFLD	Nonalcoholic fatty liver disease	Nonalcoholic fatty liver disease || ||	TRUE	igd	#N/A	#N/A	#N/A	#N/A	#N/A	#N/A	#N/A	0.00264883	4.90004e-38	Testosterone levels	TRUE	reported	h2pHMv	textfile	2	TRUE
90	rs6008259	A	G	A	G	-0.0208006	0.1168	0.179133	0.1374	FALSE	FALSE	FALSE	finn-b-NAFLD	22	46633782	0.0691	#N/A	0.0911003	Nonalcoholic fatty liver disease || id:finn-b-NAFLD	Nonalcoholic fatty liver disease	Nonalcoholic fatty liver disease || ||	TRUE	igd	#N/A	#N/A	#N/A	#N/A	#N/A	#N/A	#N/A	0.00330997	5.30029e-11	Testosterone levels	TRUE	reported	h2pHMv	textfile	2	TRUE
91	rs6020423	T	C	T	C	-0.0250085	0.0279	0.240347	0.3116	FALSE	FALSE	FALSE	finn-b-NAFLD	20	48909667	0.052	#N/A	0.5919	Nonalcoholic fatty liver disease || id:finn-b-NAFLD	Nonalcoholic fatty liver disease	Nonalcoholic fatty liver disease || ||	TRUE	igd	#N/A	#N/A	#N/A	#N/A	#N/A	#N/A	#N/A	0.0029666	2.29985e-18	Testosterone levels	TRUE	reported	h2pHMv	textfile	2	TRUE
92	rs61237993	A	G	A	G	0.0294017	0.1475	0.127902	0.1332	FALSE	FALSE	FALSE	finn-b-NAFLD	9	34130435	0.0705	#N/A	0.0364401	Nonalcoholic fatty liver disease || id:finn-b-NAFLD	Nonalcoholic fatty liver disease	Nonalcoholic fatty liver disease || ||	TRUE	igd	#N/A	#N/A	#N/A	#N/A	#N/A	#N/A	#N/A	0.0037985	1.59993e-15	Testosterone levels	TRUE	reported	h2pHMv	textfile	2	TRUE
93	rs6151124	AAAAATTATAACTGAG	A	AAAAATTATAACTGAG	A	-0.0213344	-0.0342	0.195604	0.3021	FALSE	FALSE	FALSE	finn-b-NAFLD	9	114805221	0.0524	#N/A	0.5139	Nonalcoholic fatty liver disease || id:finn-b-NAFLD	Nonalcoholic fatty liver disease	Nonalcoholic fatty liver disease || ||	TRUE	igd	#N/A	#N/A	#N/A	#N/A	#N/A	#N/A	#N/A	0.00322935	1.50003e-12	Testosterone levels	TRUE	reported	h2pHMv	textfile	2	TRUE
94	rs61856128	A	C	A	C	-0.0346	-0.0381	0.296439	0.2937	FALSE	FALSE	FALSE	finn-b-NAFLD	10	5063382	0.0527	#N/A	0.4703	Nonalcoholic fatty liver disease || id:finn-b-NAFLD	Nonalcoholic fatty liver disease	Nonalcoholic fatty liver disease || ||	TRUE	igd	#N/A	#N/A	#N/A	#N/A	#N/A	#N/A	#N/A	0.00279843	1.39991e-36	Testosterone levels	TRUE	reported	h2pHMv	textfile	2	TRUE
95	rs62025141	G	A	G	A	-0.0263429	0.0065	0.144585	0.08678	FALSE	FALSE	FALSE	finn-b-NAFLD	15	79850183	0.0851	#N/A	0.9388	Nonalcoholic fatty liver disease || id:finn-b-NAFLD	Nonalcoholic fatty liver disease	Nonalcoholic fatty liver disease || ||	TRUE	igd	#N/A	#N/A	#N/A	#N/A	#N/A	#N/A	#N/A	0.00367234	1.20005e-13	Testosterone levels	TRUE	reported	h2pHMv	textfile	2	TRUE
96	rs62144584	C	T	C	T	-0.0188548	-0.0434	0.271794	0.3246	FALSE	FALSE	FALSE	finn-b-NAFLD	2	25004937	0.0511	#N/A	0.3962	Nonalcoholic fatty liver disease || id:finn-b-NAFLD	Nonalcoholic fatty liver disease	Nonalcoholic fatty liver disease || ||	TRUE	igd	#N/A	#N/A	#N/A	#N/A	#N/A	#N/A	#N/A	0.00284327	1.6e-10	Testosterone levels	TRUE	reported	h2pHMv	textfile	2	TRUE
97	rs62223042	G	A	G	A	0.0153338	0.1069	0.37473	0.5188	FALSE	FALSE	FALSE	finn-b-NAFLD	21	40683740	0.048	#N/A	0.0258899	Nonalcoholic fatty liver disease || id:finn-b-NAFLD	Nonalcoholic fatty liver disease	Nonalcoholic fatty liver disease || ||	TRUE	igd	#N/A	#N/A	#N/A	#N/A	#N/A	#N/A	#N/A	0.0026268	1.09999e-09	Testosterone levels	TRUE	reported	h2pHMv	textfile	2	TRUE
98	rs62231822	T	C	T	C	-0.0288713	-0.0523	0.098688	0.05677	FALSE	FALSE	FALSE	finn-b-NAFLD	3	14423060	0.1033	#N/A	0.6126	Nonalcoholic fatty liver disease || id:finn-b-NAFLD	Nonalcoholic fatty liver disease	Nonalcoholic fatty liver disease || ||	TRUE	igd	#N/A	#N/A	#N/A	#N/A	#N/A	#N/A	#N/A	0.00426074	8.30042e-12	Testosterone levels	TRUE	reported	h2pHMv	textfile	2	TRUE
99	rs62263023	A	T	A	T	0.0281185	0.0794	0.091487	0.09524	FALSE	TRUE	FALSE	finn-b-NAFLD	3	48260304	0.0816	#N/A	0.3306	Nonalcoholic fatty liver disease || id:finn-b-NAFLD	Nonalcoholic fatty liver disease	Nonalcoholic fatty liver disease || ||	TRUE	igd	#N/A	#N/A	#N/A	#N/A	#N/A	#N/A	#N/A	0.00439876	7.00003e-11	Testosterone levels	TRUE	reported	h2pHMv	textfile	2	TRUE
100	rs6486122	T	C	T	C	0.0167011	0.0082	0.689797	0.5384	FALSE	FALSE	FALSE	finn-b-NAFLD	11	13361524	0.0481	#N/A	0.864	Nonalcoholic fatty liver disease || id:finn-b-NAFLD	Nonalcoholic fatty liver disease	Nonalcoholic fatty liver disease || ||	TRUE	igd	#N/A	#N/A	#N/A	#N/A	#N/A	#N/A	#N/A	0.00274032	1.7e-09	Testosterone levels	TRUE	reported	h2pHMv	textfile	2	TRUE
101	rs6603979	G	A	G	A	-0.0238916	-0.0376	0.793486	0.7781	FALSE	FALSE	FALSE	finn-b-NAFLD	1	92979354	0.0575	#N/A	0.5128	Nonalcoholic fatty liver disease || id:finn-b-NAFLD	Nonalcoholic fatty liver disease	Nonalcoholic fatty liver disease || ||	TRUE	igd	#N/A	#N/A	#N/A	#N/A	#N/A	#N/A	#N/A	0.00310952	3.40017e-15	Testosterone levels	TRUE	reported	h2pHMv	textfile	2	TRUE
102	rs6684361	C	T	C	T	0.0395286	0.0606	0.30697	0.3833	FALSE	FALSE	FALSE	finn-b-NAFLD	1	101737743	0.0492	#N/A	0.2187	Nonalcoholic fatty liver disease || id:finn-b-NAFLD	Nonalcoholic fatty liver disease	Nonalcoholic fatty liver disease || ||	TRUE	igd	#N/A	#N/A	#N/A	#N/A	#N/A	#N/A	#N/A	0.00275514	5.40008e-48	Testosterone levels	TRUE	reported	h2pHMv	textfile	2	TRUE
103	rs6788984	G	A	G	A	-0.0200685	0.0108	0.143532	0.07545	FALSE	FALSE	FALSE	finn-b-NAFLD	3	41107173	0.0907	#N/A	0.9049	Nonalcoholic fatty liver disease || id:finn-b-NAFLD	Nonalcoholic fatty liver disease	Nonalcoholic fatty liver disease || ||	TRUE	igd	#N/A	#N/A	#N/A	#N/A	#N/A	#N/A	#N/A	0.00364066	2.39999e-08	Testosterone levels	TRUE	reported	h2pHMv	textfile	2	TRUE
104	rs6792725	G	A	G	A	-0.0172911	0.0214	0.691927	0.5425	FALSE	FALSE	FALSE	finn-b-NAFLD	3	24520283	0.0488	#N/A	0.6617	Nonalcoholic fatty liver disease || id:finn-b-NAFLD	Nonalcoholic fatty liver disease	Nonalcoholic fatty liver disease || ||	TRUE	igd	#N/A	#N/A	#N/A	#N/A	#N/A	#N/A	#N/A	0.00282453	5e-10	Testosterone levels	TRUE	reported	h2pHMv	textfile	2	TRUE
105	rs687339	T	C	T	C	0.0395716	0.1856	0.772974	0.8486	FALSE	FALSE	FALSE	finn-b-NAFLD	3	135932359	0.0667	#N/A	0.005423	Nonalcoholic fatty liver disease || id:finn-b-NAFLD	Nonalcoholic fatty liver disease	Nonalcoholic fatty liver disease || ||	TRUE	igd	#N/A	#N/A	#N/A	#N/A	#N/A	#N/A	#N/A	0.00302296	4.10015e-39	Testosterone levels	TRUE	reported	h2pHMv	textfile	2	TRUE
106	rs6920820	G	C	G	C	0.0676911	-0.2105	0.011671	0.00202	FALSE	TRUE	FALSE	finn-b-NAFLD	6	30969938	0.5163	#N/A	0.683501	Nonalcoholic fatty liver disease || id:finn-b-NAFLD	Nonalcoholic fatty liver disease	Nonalcoholic fatty liver disease || ||	TRUE	igd	#N/A	#N/A	#N/A	#N/A	#N/A	#N/A	#N/A	0.0117933	2.1e-09	Testosterone levels	TRUE	reported	h2pHMv	textfile	2	TRUE
107	rs6920820	G	C	A	C	0.0676911	-0.0583	0.011671	0.0227	TRUE	TRUE	FALSE	finn-b-NAFLD	6	30969938	0.1618	#N/A	0.7186	Nonalcoholic fatty liver disease || id:finn-b-NAFLD	Nonalcoholic fatty liver disease	Nonalcoholic fatty liver disease || ||	TRUE	igd	#N/A	#N/A	#N/A	#N/A	#N/A	#N/A	#N/A	0.0117933	2.1e-09	Testosterone levels	TRUE	reported	h2pHMv	textfile	2	FALSE
108	rs6923071	T	C	T	C	-0.0178044	-0.0662	0.432019	0.493	FALSE	FALSE	FALSE	finn-b-NAFLD	6	127188502	0.0478	#N/A	0.1664	Nonalcoholic fatty liver disease || id:finn-b-NAFLD	Nonalcoholic fatty liver disease	Nonalcoholic fatty liver disease || ||	TRUE	igd	#N/A	#N/A	#N/A	#N/A	#N/A	#N/A	#N/A	0.00256872	2.90001e-12	Testosterone levels	TRUE	reported	h2pHMv	textfile	2	TRUE
109	rs6957987	G	A	G	A	-0.0266965	-0.0422	0.099774	0.1633	FALSE	FALSE	FALSE	finn-b-NAFLD	7	98898149	0.0644	#N/A	0.512201	Nonalcoholic fatty liver disease || id:finn-b-NAFLD	Nonalcoholic fatty liver disease	Nonalcoholic fatty liver disease || ||	TRUE	igd	#N/A	#N/A	#N/A	#N/A	#N/A	#N/A	#N/A	0.00422137	2.30001e-10	Testosterone levels	TRUE	reported	h2pHMv	textfile	2	TRUE
110	rs6995299	C	T	C	T	-0.0225433	-0.0316	0.861927	0.8508	FALSE	FALSE	FALSE	finn-b-NAFLD	8	81520237	0.0679	#N/A	0.642	Nonalcoholic fatty liver disease || id:finn-b-NAFLD	Nonalcoholic fatty liver disease	Nonalcoholic fatty liver disease || ||	TRUE	igd	#N/A	#N/A	#N/A	#N/A	#N/A	#N/A	#N/A	0.00377568	1.79999e-09	Testosterone levels	TRUE	reported	h2pHMv	textfile	2	TRUE
111	rs7078330	T	C	T	C	0.0312818	0.0342	0.087856	0.1401	FALSE	FALSE	FALSE	finn-b-NAFLD	10	122834163	0.0691	#N/A	0.6204	Nonalcoholic fatty liver disease || id:finn-b-NAFLD	Nonalcoholic fatty liver disease	Nonalcoholic fatty liver disease || ||	TRUE	igd	#N/A	#N/A	#N/A	#N/A	#N/A	#N/A	#N/A	0.00447431	5.70033e-13	Testosterone levels	TRUE	reported	h2pHMv	textfile	2	TRUE
112	rs7089122	C	T	C	T	-0.024365	0.0041	0.822282	0.8386	FALSE	FALSE	FALSE	finn-b-NAFLD	10	93647412	0.0651	#N/A	0.9501	Nonalcoholic fatty liver disease || id:finn-b-NAFLD	Nonalcoholic fatty liver disease	Nonalcoholic fatty liver disease || ||	TRUE	igd	#N/A	#N/A	#N/A	#N/A	#N/A	#N/A	#N/A	0.00332118	1.69981e-14	Testosterone levels	TRUE	reported	h2pHMv	textfile	2	TRUE
113	rs7139079	A	G	A	G	-0.0220891	0.0228	0.592713	0.5506	FALSE	FALSE	FALSE	finn-b-NAFLD	12	121415293	0.0483	#N/A	0.637101	Nonalcoholic fatty liver disease || id:finn-b-NAFLD	Nonalcoholic fatty liver disease	Nonalcoholic fatty liver disease || ||	TRUE	igd	#N/A	#N/A	#N/A	#N/A	#N/A	#N/A	#N/A	0.00258299	1.10002e-16	Testosterone levels	TRUE	reported	h2pHMv	textfile	2	TRUE
114	rs7183977	C	T	C	T	0.0285915	-0.035	0.34771	0.3655	FALSE	FALSE	FALSE	finn-b-NAFLD	15	40377092	0.0499	#N/A	0.4822	Nonalcoholic fatty liver disease || id:finn-b-NAFLD	Nonalcoholic fatty liver disease	Nonalcoholic fatty liver disease || ||	TRUE	igd	#N/A	#N/A	#N/A	#N/A	#N/A	#N/A	#N/A	0.0026794	7.8001e-27	Testosterone levels	TRUE	reported	h2pHMv	textfile	2	TRUE
115	rs7248104	A	G	A	G	-0.0156963	-0.0778	0.41564	0.4348	FALSE	FALSE	FALSE	finn-b-NAFLD	19	7224431	0.0484	#N/A	0.1075	Nonalcoholic fatty liver disease || id:finn-b-NAFLD	Nonalcoholic fatty liver disease	Nonalcoholic fatty liver disease || ||	TRUE	igd	#N/A	#N/A	#N/A	#N/A	#N/A	#N/A	#N/A	0.00257654	4.49997e-10	Testosterone levels	TRUE	reported	h2pHMv	textfile	2	TRUE
116	rs727428	C	T	C	T	-0.0947823	-0.0564	0.555746	0.6127	FALSE	FALSE	FALSE	finn-b-NAFLD	17	7537792	0.0492	#N/A	0.2513	Nonalcoholic fatty liver disease || id:finn-b-NAFLD	Nonalcoholic fatty liver disease	Nonalcoholic fatty liver disease || ||	TRUE	igd	#N/A	#N/A	#N/A	#N/A	#N/A	#N/A	#N/A	0.00254019	1e-200	Testosterone levels	TRUE	reported	h2pHMv	textfile	2	TRUE
117	rs73136477	T	C	T	C	-0.0191151	-0.0389	0.18974	0.1297	FALSE	FALSE	FALSE	finn-b-NAFLD	12	98903420	0.0714	#N/A	0.5862	Nonalcoholic fatty liver disease || id:finn-b-NAFLD	Nonalcoholic fatty liver disease	Nonalcoholic fatty liver disease || ||	TRUE	igd	#N/A	#N/A	#N/A	#N/A	#N/A	#N/A	#N/A	0.00321903	2.80001e-09	Testosterone levels	TRUE	reported	h2pHMv	textfile	2	TRUE
118	rs73161762	T	C	T	C	0.018128	-0.0148	0.191147	0.2267	FALSE	FALSE	FALSE	finn-b-NAFLD	7	100014846	0.0572	#N/A	0.7953	Nonalcoholic fatty liver disease || id:finn-b-NAFLD	Nonalcoholic fatty liver disease	Nonalcoholic fatty liver disease || ||	TRUE	igd	#N/A	#N/A	#N/A	#N/A	#N/A	#N/A	#N/A	0.00321596	6.90001e-09	Testosterone levels	TRUE	reported	h2pHMv	textfile	2	TRUE
119	rs7515597	T	C	T	C	-0.018071	0.0318	0.405162	0.2455	FALSE	FALSE	FALSE	finn-b-NAFLD	1	51159347	0.0556	#N/A	0.5668	Nonalcoholic fatty liver disease || id:finn-b-NAFLD	Nonalcoholic fatty liver disease	Nonalcoholic fatty liver disease || ||	TRUE	igd	#N/A	#N/A	#N/A	#N/A	#N/A	#N/A	#N/A	0.0025765	3.50026e-12	Testosterone levels	TRUE	reported	h2pHMv	textfile	2	TRUE
120	rs7633673	A	G	A	G	-0.018352	0.0645	0.40578	0.2541	FALSE	FALSE	FALSE	finn-b-NAFLD	3	152084243	0.0551	#N/A	0.2418	Nonalcoholic fatty liver disease || id:finn-b-NAFLD	Nonalcoholic fatty liver disease	Nonalcoholic fatty liver disease || ||	TRUE	igd	#N/A	#N/A	#N/A	#N/A	#N/A	#N/A	#N/A	0.00257261	2.60016e-13	Testosterone levels	TRUE	reported	h2pHMv	textfile	2	TRUE
121	rs76895963	G	T	G	T	-0.0875478	-0.3605	0.020965	0.03114	FALSE	FALSE	FALSE	finn-b-NAFLD	12	4384844	0.1443	#N/A	0.0124701	Nonalcoholic fatty liver disease || id:finn-b-NAFLD	Nonalcoholic fatty liver disease	Nonalcoholic fatty liver disease || ||	TRUE	igd	#N/A	#N/A	#N/A	#N/A	#N/A	#N/A	#N/A	0.00973875	5.50047e-21	Testosterone levels	TRUE	reported	h2pHMv	textfile	2	TRUE
122	rs7780066	A	G	A	G	0.0227824	-0.0098	0.793042	0.8131	FALSE	FALSE	FALSE	finn-b-NAFLD	7	137801915	0.0616	#N/A	0.873	Nonalcoholic fatty liver disease || id:finn-b-NAFLD	Nonalcoholic fatty liver disease	Nonalcoholic fatty liver disease || ||	TRUE	igd	#N/A	#N/A	#N/A	#N/A	#N/A	#N/A	#N/A	0.00312283	3.10027e-13	Testosterone levels	TRUE	reported	h2pHMv	textfile	2	TRUE
123	rs78058190	A	G	A	G	0.0408659	0.0921	0.050582	0.0823	FALSE	FALSE	FALSE	finn-b-NAFLD	2	219699999	0.0879	#N/A	0.2944	Nonalcoholic fatty liver disease || id:finn-b-NAFLD	Nonalcoholic fatty liver disease	Nonalcoholic fatty liver disease || ||	TRUE	igd	#N/A	#N/A	#N/A	#N/A	#N/A	#N/A	#N/A	0.00649989	2e-10	Testosterone levels	TRUE	reported	h2pHMv	textfile	2	TRUE
124	rs78081080	T	C	T	C	0.0370356	0.0315	0.079968	0.1047	FALSE	FALSE	FALSE	finn-b-NAFLD	17	7320581	0.0786	#N/A	0.689	Nonalcoholic fatty liver disease || id:finn-b-NAFLD	Nonalcoholic fatty liver disease	Nonalcoholic fatty liver disease || ||	TRUE	igd	#N/A	#N/A	#N/A	#N/A	#N/A	#N/A	#N/A	0.00472974	5.70033e-15	Testosterone levels	TRUE	reported	h2pHMv	textfile	2	TRUE
125	rs78357146	G	A	G	A	0.0573604	0.3121	0.029649	0.009401	FALSE	FALSE	FALSE	finn-b-NAFLD	17	64305051	0.2483	#N/A	0.2088	Nonalcoholic fatty liver disease || id:finn-b-NAFLD	Nonalcoholic fatty liver disease	Nonalcoholic fatty liver disease || ||	TRUE	igd	#N/A	#N/A	#N/A	#N/A	#N/A	#N/A	#N/A	0.00744007	8.10028e-15	Testosterone levels	TRUE	reported	h2pHMv	textfile	2	TRUE
126	rs8046391	C	G	C	G	0.0170855	-0.0747	0.272182	0.3356	FALSE	TRUE	FALSE	finn-b-NAFLD	16	30836648	0.0507	#N/A	0.1406	Nonalcoholic fatty liver disease || id:finn-b-NAFLD	Nonalcoholic fatty liver disease	Nonalcoholic fatty liver disease || ||	TRUE	igd	#N/A	#N/A	#N/A	#N/A	#N/A	#N/A	#N/A	0.00284538	8.79995e-10	Testosterone levels	TRUE	reported	h2pHMv	textfile	2	TRUE
127	rs8089112	T	A	T	A	0.0186131	-0.0399	0.722691	0.6758	FALSE	TRUE	FALSE	finn-b-NAFLD	18	3816053	0.051	#N/A	0.434	Nonalcoholic fatty liver disease || id:finn-b-NAFLD	Nonalcoholic fatty liver disease	Nonalcoholic fatty liver disease || ||	TRUE	igd	#N/A	#N/A	#N/A	#N/A	#N/A	#N/A	#N/A	0.0028444	5.60015e-11	Testosterone levels	TRUE	reported	h2pHMv	textfile	2	TRUE
128	rs8093038	C	T	C	T	-0.0261529	-0.1241	0.102006	0.09138	FALSE	FALSE	FALSE	finn-b-NAFLD	18	72036182	0.0834	#N/A	0.1366	Nonalcoholic fatty liver disease || id:finn-b-NAFLD	Nonalcoholic fatty liver disease	Nonalcoholic fatty liver disease || ||	TRUE	igd	#N/A	#N/A	#N/A	#N/A	#N/A	#N/A	#N/A	0.00421347	1e-10	Testosterone levels	TRUE	reported	h2pHMv	textfile	2	TRUE
129	rs8112559	G	C	G	C	-0.0216173	-0.0155	0.125122	0.08787	FALSE	TRUE	FALSE	finn-b-NAFLD	19	46390455	0.0844	#N/A	0.854	Nonalcoholic fatty liver disease || id:finn-b-NAFLD	Nonalcoholic fatty liver disease	Nonalcoholic fatty liver disease || ||	TRUE	igd	#N/A	#N/A	#N/A	#N/A	#N/A	#N/A	#N/A	0.00383728	5e-09	Testosterone levels	TRUE	reported	h2pHMv	textfile	2	TRUE
130	rs850294	T	C	T	C	0.0337033	-0.0077	0.113609	0.07294	FALSE	FALSE	FALSE	finn-b-NAFLD	11	123437669	0.0922	#N/A	0.9338	Nonalcoholic fatty liver disease || id:finn-b-NAFLD	Nonalcoholic fatty liver disease	Nonalcoholic fatty liver disease || ||	TRUE	igd	#N/A	#N/A	#N/A	#N/A	#N/A	#N/A	#N/A	0.00401465	5.19996e-18	Testosterone levels	TRUE	reported	h2pHMv	textfile	2	TRUE
131	rs9379084	A	G	A	G	0.0224985	0.1956	0.115835	0.1139	FALSE	FALSE	FALSE	finn-b-NAFLD	6	7231843	0.0764	#N/A	0.0103999	Nonalcoholic fatty liver disease || id:finn-b-NAFLD	Nonalcoholic fatty liver disease	Nonalcoholic fatty liver disease || ||	TRUE	igd	#N/A	#N/A	#N/A	#N/A	#N/A	#N/A	#N/A	0.00408423	2.90001e-08	Testosterone levels	TRUE	reported	h2pHMv	textfile	2	TRUE
132	rs9388769	A	G	A	G	0.0163953	0.1809	0.673529	0.6745	FALSE	FALSE	FALSE	finn-b-NAFLD	6	130379954	0.0509	#N/A	0.000384202	Nonalcoholic fatty liver disease || id:finn-b-NAFLD	Nonalcoholic fatty liver disease	Nonalcoholic fatty liver disease || ||	TRUE	igd	#N/A	#N/A	#N/A	#N/A	#N/A	#N/A	#N/A	0.00269783	3.59998e-09	Testosterone levels	TRUE	reported	h2pHMv	textfile	2	TRUE
133	rs9527	T	C	T	C	-0.0230347	-0.012	0.241537	0.2145	FALSE	FALSE	FALSE	finn-b-NAFLD	10	104623578	0.0583	#N/A	0.8371	Nonalcoholic fatty liver disease || id:finn-b-NAFLD	Nonalcoholic fatty liver disease	Nonalcoholic fatty liver disease || ||	TRUE	igd	#N/A	#N/A	#N/A	#N/A	#N/A	#N/A	#N/A	0.00295955	5.90065e-15	Testosterone levels	TRUE	reported	h2pHMv	textfile	2	TRUE
134	rs9636441	C	T	C	T	0.0167895	0.0064	0.289842	0.2354	FALSE	FALSE	FALSE	finn-b-NAFLD	2	62437709	0.0569	#N/A	0.9106	Nonalcoholic fatty liver disease || id:finn-b-NAFLD	Nonalcoholic fatty liver disease	Nonalcoholic fatty liver disease || ||	TRUE	igd	#N/A	#N/A	#N/A	#N/A	#N/A	#N/A	#N/A	0.00279578	6.69993e-10	Testosterone levels	TRUE	reported	h2pHMv	textfile	2	TRUE
135	rs9895413	T	C	T	C	0.0389976	0.0444	0.090724	0.1364	FALSE	FALSE	FALSE	finn-b-NAFLD	17	7888100	0.0702	#N/A	0.5273	Nonalcoholic fatty liver disease || id:finn-b-NAFLD	Nonalcoholic fatty liver disease	Nonalcoholic fatty liver disease || ||	TRUE	igd	#N/A	#N/A	#N/A	#N/A	#N/A	#N/A	#N/A	0.00442539	3.10027e-18	Testosterone levels	TRUE	reported	h2pHMv	textfile	2	TRUE
